# Supplementary material for: A bioinspired route to indanes and cyclopentannulated hetarenes via (3+2)-cyclodimerization of donor–acceptor cyclopropanes
Source: Royal Society of Chemistry journal article supplement (doi:10.1039/c3cc44475a), 2013-01-01

Supporting Information

**Bioinspired Route to Indanes and Cyclopentannulated Hetarenes *via* (3+2)-  
Cyclodimerization of Donor-Acceptor Cyclopropanes**

Olga A. Ivanova,<sup>a</sup> Ekaterina M. Budynina,<sup>a,b,\*</sup> Dmitriy A. Skvortsov,<sup>a</sup> Michelle Limoge,<sup>c</sup> Andrei V. Bakin,<sup>c</sup> Alexey O. Chagarovskiy,<sup>a,b</sup> Igor V. Trushkov<sup>a,b</sup> and Mikhail Ya. Melnikov<sup>a</sup>

<sup>a</sup> Department of Chemistry, M. V. Lomonosov Moscow State University, Leninskie gory 1-3,  
Moscow 119991 Russia, e-mail: [ekatbud@kinet.chem.msu.ru](mailto:ekatbud@kinet.chem.msu.ru)

<sup>b</sup> Federal Research Center of Pediatric Hematology, Oncology and Immunology named after  
Dmitrii Rogachev, Samory Mashela 1, Moscow 117997 Russia

<sup>c</sup> Department of Cancer Genetics, Roswell Park Cancer Institute, Elm and Carlton Sts. Buffalo,  
NY 14263

## Table of Content

|                                                                                                     |     |
|-----------------------------------------------------------------------------------------------------|-----|
| General Information                                                                                 | S2  |
| Analytical data for dimethyl 2-(2,3,4-trimethoxyphenyl)cyclopropane-1,1-dicarboxylate ( <b>1d</b> ) | S3  |
| Optimization of the reaction conditions for (3+2)-cyclodimerization                                 | S3  |
| General procedure for the Sn(OTf) <sub>2</sub> -catalyzed cyclodimerization (method <b>A</b> )      | S4  |
| General procedure for the Sn(OTf) <sub>2</sub> -catalyzed cross-dimerization (method <b>B</b> )     | S4  |
| Analytical data for cyclodimers <b>1a-c</b> and cross-dimers <b>1d-i</b>                            | S5  |
| Analytical data for dimethyl ( <i>E</i> )-(3,4-dimethoxystyryl)malonate ( <b>3c</b> )               | S12 |
| Cell assays                                                                                         | S13 |
| Results of geometry optimization for two diastereomers of <b>2c</b> at B3LYP/6-311G** level         | S15 |
| References                                                                                          | S19 |
| <sup>1</sup> H and <sup>13</sup> C NMR spectra                                                      | S20 |

### General Information

NMR spectra were acquired on Bruker Avance 600 spectrometer at room temperature; the chemical shifts  $\delta$  were measured in ppm with respect to solvent (<sup>1</sup>H: CDCl<sub>3</sub>,  $\delta$  = 7.27 ppm; <sup>13</sup>C: CDCl<sub>3</sub>,  $\delta$  = 77.00 ppm). Splitting patterns are designated as s, singlet; d, doublet; t, triplet; q, quartet; m, multiplet; dd, double doublet. Coupling constants (*J*) are in Hertz. The structures of all compounds were elucidated with the aid of 1D NMR (<sup>1</sup>H, <sup>13</sup>C) and 2D NMR (COSY <sup>1</sup>H–<sup>1</sup>H, NOESY) spectroscopy. Infrared spectra were recorded on Thermo Nicolet IR200 FT-IR spectrometer. MALDI-TOF (Matrix Assisted Laser Desorption Ionization / Time of Flight) mass spectra were recorded on BrukerDaltonicsUltraflex II spectrometer in positive mode; anthracene or 1,8,9-trihydroxyanthracene were used as a matrix. LCMS spectra were acquired on Shimadzu HPLC chromatograph with Waters XBridge C18 3,5  $\mu$ m (4.6 x 150 mm) column, PE SCIEX API-150EX mass detector (electrospray ionization) and Shimadzu (lmax 220 and 254 nm) UV-detector. High resolution and accurate mass measurements were carried out using a Bruker micrOTOF-Q<sup>TM</sup> ESI-TOF (Electro Spray Ionization / Time of Flight) and Thermo Scientific\* LTQ Orbitrap mass spectrometers. Elemental analyses were performed with Fisons EA-1108 CHNS elemental analyser instrument. Melting points (mp) are uncorrected and were measured on Electrothermal 9100 capillary melting point apparatus. X-Ray analysis was performed on STOE STADI VARI PILATUS-100K diffractometer. Analytical thin layer chromatography (TLC) was carried out with silica gel plates (silica gel 60, F<sub>254</sub>, supported on aluminium); the revelation was done by UV lamp (365 nm) and chemical staining (iodine vapor and potassium permanganate solution in water). Column chromatography was performed on

silica gel 60 (230–400 mesh, Merck). Lewis acids ( $\text{Sn}(\text{OTf})_2$ ,  $\text{FeCl}_3$ ,  $\text{ZnCl}_2$ ) were commercially available. All the reactions were carried out using freshly distilled and dry solvents. Parent arylmethylenemalonates and 2-aryl-1,1-cyclopropane diesters **1** were prepared by published procedures.<sup>[S1]</sup> Dimethyl [(*E*)-2-(2,3-dihydro-1,4-benzodioxin-6-yl)vinyl]malonate (**3a**) and dimethyl (*E*)-2-(4-methoxystyryl)malonate (**3b**) were synthesized according to procedure described earlier.<sup>[S2,S3]</sup> Quantum chemical calculations were performed using Gaussian 98 package.<sup>[S4]</sup>

### Dimethyl 2-(2,3,4-trimethoxyphenyl)cyclopropane-1,1-dicarboxylate (**1d**)

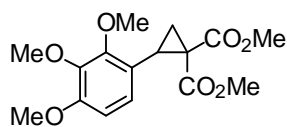

Cyclopropane **1d** was obtained according to reported procedure<sup>[S1]</sup> from dimethyl 2-(2,3,4-trimethoxybenzylidene)malonate (3.10 g, 10 mmol), NaH (0.48 g, 12 mmol) and trimethylsulfoxonium iodide (2.64 g, 12 mmol), reaction time 2 h. Yield 2.53 g (78%); yellow oil;  $R_f$  0.5 (diethyl ether).

$^1\text{H}$  NMR ( $\text{CDCl}_3$ , 600 MHz)  $\delta$  = 1.68 (dd,  $^2J = 5.3$ ,  $^3J = 9.4$  Hz, 1H,  $\text{CH}_2$ ), 2.13 (dd,  $^2J = 5.3$ ,  $^3J = 8.9$  Hz, 1H,  $\text{CH}_2$ ), 3.27 (dd,  $^3J = 8.9$ ,  $^3J = 9.4$  Hz, 1H, CH), 3.37 (s, 3H,  $\text{OCH}_3$ ), 3.76 (s, 3H,  $\text{OCH}_3$ ), 3.79 (s, 3H,  $\text{OCH}_3$ ), 3.81 (s, 3H,  $\text{OCH}_3$ ), 3.87 (s, 3H,  $\text{OCH}_3$ ), 6.52 (d,  $^3J = 8.6$  Hz, 1H, Ar), 6.60 (d,  $^3J = 8.6$  Hz, 1H, Ar);  $^{13}\text{C}$  NMR ( $\text{CDCl}_3$ , 150 MHz)  $\delta$  = 18.34 ( $\text{CH}_2$ ), 28.23 (CH), 36.91 (C), 52.21 ( $\text{OCH}_3$ ), 52.73 ( $\text{OCH}_3$ ), 55.87 ( $\text{OCH}_3$ ), 60.79 ( $\text{OCH}_3$ ), 60.84 ( $\text{OCH}_3$ ), 106.28 (CH), 120.52 (C), 121.79 (CH), 141.95 (C), 153.22 (C), 153.74 (C), 167.23 ( $\text{CO}_2\text{Me}$ ), 170.20 ( $\text{CO}_2\text{Me}$ );

IR (film) 2970, 2855, 1740, 1600, 1510, 1470, 1450, 1420, 1380, 1340, 1290, 1220, 1140, 1110, 1070, 1030, 820  $\text{cm}^{-1}$ ;

MALDI-TOF MS:  $m/z = 347$  [ $\text{M}+\text{Na}$ ] $^+$  (calcd. 347 for  $\text{C}_{16}\text{H}_{20}\text{NaO}_7$ );

Anal. Calcd. for  $\text{C}_{16}\text{H}_{20}\text{O}_7$ : C, 59.25; H, 6.22. Found: C, 59.40; H, 6.17.

### Optimization of the reaction conditions for (3+2)-cyclodimerization

Optimization of the reaction conditions was carried out for 3,4-dialkoxyphenyl-substituted cyclopropane **1a** as a model compound under variation of Lewis acids, solvent polarity and reaction temperature (see Table). The best yield of dimeric product **2a** was achieved when 0.2 M solution of **1a** in nitromethane was treated with 30 mol % of  $\text{Sn}(\text{OTf})_2$  followed by reflux (Entry 9).

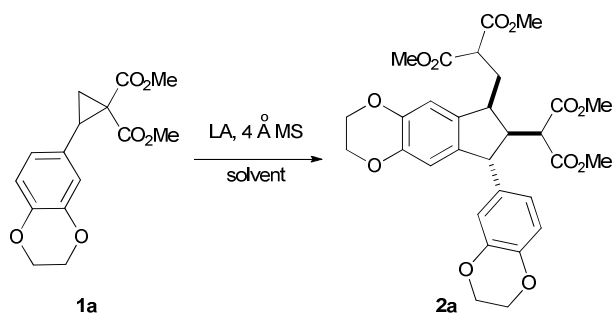

| Entry    | LA (mol %)                      | Solvent (c (mol/L))           | Time (h)   | T (°C)        | Isolated yield (%) |
|----------|---------------------------------|-------------------------------|------------|---------------|--------------------|
| 1        | FeCl <sub>3</sub> (100)         | DCE (0.1)                     | 2          | reflux        | - <sup>a</sup>     |
| 2        | SnCl <sub>4</sub> (200)         | MeNO <sub>2</sub> (0.2)       | 2          | reflux        | - <sup>a</sup>     |
| 3        | Sn(OTf) <sub>2</sub> (10)       | PhCl (0.2)                    | 2          | reflux        | - <sup>b</sup>     |
| 4        | Sn(OTf) <sub>2</sub> (10)       | DCE (0.2)                     | 2          | reflux        | 15 <sup>c</sup>    |
| 5        | Sn(OTf) <sub>2</sub> (10)       | MeNO <sub>2</sub> (0.1)       | 4          | 60            | 27                 |
| 6        | Sn(OTf) <sub>2</sub> (15)       | MeNO <sub>2</sub> (0.1)       | 3          | 60            | 35                 |
| 7        | Sn(OTf) <sub>2</sub> (10)       | MeNO <sub>2</sub> (0.2)       | 2          | 70            | 56                 |
| 8        | Sn(OTf) <sub>2</sub> (30)       | MeNO <sub>2</sub> (0.2)       | 0.75       | 70            | 71                 |
| <b>9</b> | <b>Sn(OTf)<sub>2</sub> (30)</b> | <b>MeNO<sub>2</sub> (0.2)</b> | <b>0.5</b> | <b>reflux</b> | <b>80</b>          |

<sup>a</sup> Oligomeric and polymeric products were only formed. <sup>b</sup> Mixture of products containing no **2a** was formed. <sup>c</sup> Isomeric alkene **3a** was the main product.

#### General procedure for the Sn(OTf)<sub>2</sub>-catalyzed cyclodimerization (method A)

Sn(OTf)<sub>2</sub> (125 mg, 30 mol %) was added under argon atmosphere to a preheated up to 60 °C and vigorously stirred solution of cyclopropane **1** (1.0 mmol) in CH<sub>3</sub>NO<sub>2</sub> (5 mL) containing 4 Å molecular sieves. The resulting mixture was refluxed for specified time and then poured into 5 mL of saturated aqueous NaHCO<sub>3</sub>. After extraction with CH<sub>2</sub>Cl<sub>2</sub> (3×2 mL), the combined organic fractions were washed with aqueous NaHCO<sub>3</sub> (3×2 mL) and aqueous Trilon B (2×2 mL). The organic layer was then dried with Na<sub>2</sub>SO<sub>4</sub>. The solvent was evaporated under vacuum, and the residue was purified by column chromatography (SiO<sub>2</sub>, eluent – diethyl ether : petroleum ether, 3:1).

#### General procedure for the Sn(OTf)<sub>2</sub>-catalyzed cross-dimerization (method B)

Sn(OTf)<sub>2</sub> (125 mg, 60 mol%) was added under argon atmosphere to a preheated up to 100 °C and vigorously stirred solution of cyclopropane **1** (0.5 mmol) and alkene **3** (0.5 mmol) in CH<sub>3</sub>NO<sub>2</sub> (5 mL) containing 4 Å molecular sieves. The resulting mixture was refluxed for 0.5 h and then poured into 5 mL of saturated aqueous NaHCO<sub>3</sub>. After extraction with CH<sub>2</sub>Cl<sub>2</sub> (3×2

mL), the combined organic fractions were washed with aqueous NaHCO<sub>3</sub> (3×2 mL) and aqueous Trilon B (2×2 mL). The organic layer was then dried with Na<sub>2</sub>SO<sub>4</sub>. The solvent was evaporated under vacuum, and the residue was purified by column chromatography (SiO<sub>2</sub>, eluent – diethyl ether : petroleum ether, 3:1).

**Dimethyl**                    **{[(6*RS*,7*SR*,8*SR*)-8-(2,3-dihydro-1,4-benzodioxin-6-yl)-7-[2-methoxy-1-(methoxycarbonyl)-2-oxoethyl]-2,3,7,8-tetrahydro-6H-indeno[5,6-b][1,4]dioxin-6-yl]-methyl}malonate (**2a**)<sup>[S2]</sup>**

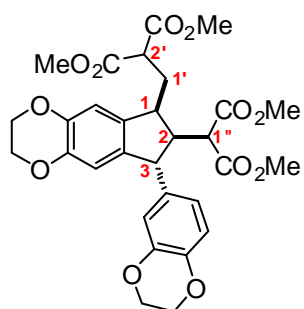

Cyclodimer **2a** was obtained according to method **A** from dimethyl 2-(2,3-dihydro-1,4-benzodioxin-6-yl)cyclopropane-1,1-dicarboxylate (**1a**) (292 mg, 1 mmol) under catalysis by Sn(OTf)<sub>2</sub> (125 mg, 0.3 mmol), reaction time 0.5 h. Yield 234 mg (80%); white foam; *R<sub>f</sub>* 0.5 (diethyl ether); mp 170–171 °C.

<sup>1</sup>H NMR (CDCl<sub>3</sub>, 600 MHz)\*  $\delta$  = 1.70 (ddd, <sup>2</sup>*J* = 12.8, <sup>3</sup>*J*<sub>1',2'</sub> = 3.6, <sup>3</sup>*J*<sub>1',1</sub> = 12.5 Hz, 1H, C(1')H<sub>2</sub>), 2.04 (ddd, <sup>2</sup>*J* = 12.8, <sup>3</sup>*J*<sub>1',1</sub> = 3.3, <sup>3</sup>*J*<sub>1',2'</sub> = 11.8 Hz, 1H, C(1')H<sub>2</sub>), 3.09 (s, 3H, OCH<sub>3</sub>), 3.21 (ddd, <sup>3</sup>*J*<sub>1',1</sub> = 3.3, <sup>3</sup>*J*<sub>1,2</sub> = 6.9, <sup>2</sup>*J*<sub>1',1</sub> = 12.5 Hz, 1H, C(1)H), 3.29 (ddd, <sup>3</sup>*J*<sub>2,1</sub> = 6.9, <sup>3</sup>*J*<sub>2,3</sub> = 10.7, <sup>3</sup>*J*<sub>2,1''</sub> = 11.3 Hz, 1H, C(2)H), 3.57 (dd, <sup>3</sup>*J*<sub>2',1'</sub> = 3.6, <sup>3</sup>*J*<sub>2',1'</sub> = 11.8 Hz, 1H, C(2')H), 3.68 (s, 3H, OCH<sub>3</sub>), 3.74 (d, <sup>3</sup>*J*<sub>1'',2</sub> = 11.3 Hz, 1H, C(2)H), 3.77 (s, 3H, OCH<sub>3</sub>), 3.84 (s, 3H, OCH<sub>3</sub>), 4.00 (d, <sup>3</sup>*J*<sub>3,2</sub> = 10.7 Hz, 1H, C(3)H), 4.18–4.27 (m, 8H, OCH<sub>2</sub>), 6.18 (s, 1H, Ar), 6.60 (br. d, <sup>3</sup>*J* = 8.2 Hz, 1H, Ar), 6.62 (br. s, 1H, Ar), 6.76 (br. d, <sup>3</sup>*J* = 8.2 Hz, 1H, Ar), 6.78 (br. s, 1H, Ar); <sup>13</sup>C NMR (CDCl<sub>3</sub>, 150 MHz)  $\delta$  = 28.96 (<sup>1</sup>*J*<sub>CH</sub> = 130 Hz, CH<sub>2</sub>), 42.69 (<sup>1</sup>*J*<sub>CH</sub> = 135 Hz, CH), 49.09 (<sup>1</sup>*J*<sub>CH</sub> = 134 Hz, CH), 51.32 (<sup>1</sup>*J*<sub>CH</sub> = 135 Hz, CH), 51.99 (<sup>1</sup>*J*<sub>CH</sub> = 135 Hz, CH), 52.71 (<sup>1</sup>*J*<sub>CH</sub> = 135 Hz, CH), 52.61 (<sup>1</sup>*J*<sub>CH</sub> = 148 Hz, OCH<sub>3</sub>), 52.74 (<sup>1</sup>*J*<sub>CH</sub> = 148 Hz, 2×OCH<sub>3</sub>), 52.78 (<sup>1</sup>*J*<sub>CH</sub> = 148 Hz, OCH<sub>3</sub>), 64.22 (<sup>1</sup>*J*<sub>CH</sub> = 148 Hz, OCH<sub>2</sub>), 64.26 (<sup>1</sup>*J*<sub>CH</sub> = 148 Hz, OCH<sub>2</sub>), 64.33 (<sup>1</sup>*J*<sub>CH</sub> = 148 Hz, OCH<sub>2</sub>), 64.37 (<sup>1</sup>*J*<sub>CH</sub> = 148 Hz, OCH<sub>2</sub>), 113.25 (CH, Ar), 114.15 (CH, Ar), 116.82 (CH, Ar), 117.94 (CH, Ar), 122.21 (CH, Ar), 134.76 (C, Ar), 136.23 (C, Ar), 139.70 (C, Ar), 142.25 (C, Ar), 142.31 (C, Ar), 143.09 (C, Ar), 143.12 (C, Ar), 168.09 (CO<sub>2</sub>Me, Ar), 168.43 (CO<sub>2</sub>Me), 169.49 (CO<sub>2</sub>Me, Ar), 169.61 (CO<sub>2</sub>Me);  
IR (Nujol) 2960, 2870, 1730, 1510, 1470, 1380, 1290, 1160, 1080 cm<sup>-1</sup>.

\* Hereinafter atom numerations in NMR assignments and in structures were made identically and might not correspond to IUPAC name. It was made to simplify the comparison between spectral data for compounds **2a-i**.

**Dimethyl ((5*RS*,6*SR*,7*SR*)-7-(1,3-benzodioxol-5-yl)-6-[2-methoxy-1-(methoxycarbonyl)-2-oxoethyl]-6,7-dihydro-5*H*-indeno[5,6-*d*][1,3]dioxol-5-yl)methyl)malonate (**2b**)**

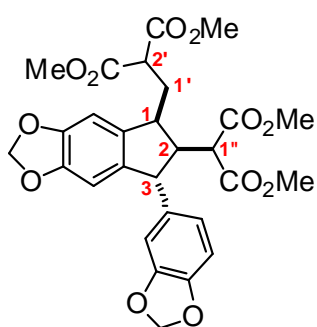

Cyclodimer **2b** was obtained according to method **A** from dimethyl 2-(1,3-benzodioxol-5-yl)cyclopropane-1,1-dicarboxylate (**1b**) (278 mg, 1 mmol) under catalysis by Sn(OTf)<sub>2</sub> (125 mg, 0.3 mmol), reaction time 0.5 h. Yield 186 mg (67%); white foam; *R*<sub>f</sub> 0.68 (diethyl ether); mp 187–189 °C.

<sup>1</sup>H NMR (CDCl<sub>3</sub>, 600 MHz)  $\delta$  = 1.74 (ddd, <sup>2</sup>*J* = 13.1, <sup>3</sup>*J*<sub>1',2'</sub> = 3.7, <sup>3</sup>*J*<sub>1',1</sub> = 12.5 Hz, 1H, C(1')H<sub>2</sub>), 2.08 (ddd, <sup>2</sup>*J* = 13.1, <sup>3</sup>*J*<sub>1',1</sub> = 3.5, <sup>3</sup>*J*<sub>1',2'</sub> = 11.9 Hz, 1H, C(1')H<sub>2</sub>), 3.13 (s, 3H, OCH<sub>3</sub>), 3.25 (ddd, <sup>3</sup>*J*<sub>1,1'</sub> = 3.5, <sup>3</sup>*J*<sub>1,2</sub> = 6.9, <sup>3</sup>*J*<sub>1,1'</sub> = 12.5 Hz, 1H, C(1)H), 3.32 (ddd, <sup>3</sup>*J*<sub>2,1</sub> = 6.9, <sup>3</sup>*J*<sub>2,3</sub> = 10.6, <sup>3</sup>*J*<sub>2,1''</sub> = 11.0 Hz, 1H, C(2)H), 3.54 (dd, <sup>3</sup>*J*<sub>2',1'</sub> = 3.7, <sup>3</sup>*J*<sub>2',1'</sub> = 11.9 Hz, 1H, C(2')H), 3.69 (s, 3H, OCH<sub>3</sub>), 3.76 (d, <sup>3</sup>*J*<sub>1'',2</sub> = 11.0 Hz, 1H, C(1'')H), 3.77 (s, 3H, OCH<sub>3</sub>), 3.84 (s, 3H, OCH<sub>3</sub>), 4.06 (d, <sup>3</sup>*J*<sub>3,2</sub> = 10.6 Hz, 1H, C(3)H), 5.87–5.94 (m, 4H, OCH<sub>2</sub>O), 6.14 (br. s, 1H, Ar), 6.57 (d, <sup>4</sup>*J* = 1.7 Hz, 1H, Ar), 6.63 (dd, <sup>3</sup>*J* = 7.9, <sup>4</sup>*J* = 1.7 Hz, 1H, Ar), 6.72 (d, <sup>3</sup>*J* = 7.9 Hz, 1H, Ar), 6.78 (br. s, 1H, Ar); <sup>13</sup>C NMR (CDCl<sub>3</sub>, 150 MHz)  $\delta$  = 29.17 (<sup>1</sup>*J*<sub>CH</sub> = 131 Hz, CH<sub>2</sub>), 42.99 (<sup>1</sup>*J*<sub>CH</sub> = 136 Hz, CH), 49.21 (<sup>1</sup>*J*<sub>CH</sub> = 134 Hz, CH), 51.71 (<sup>1</sup>*J*<sub>CH</sub> = 129 Hz, CH), 51.99 (<sup>1</sup>*J*<sub>CH</sub> = 147 Hz, OCH<sub>3</sub>), 52.15 (<sup>1</sup>*J*<sub>CH</sub> = 129 Hz, CH), 52.53 (<sup>1</sup>*J*<sub>CH</sub> = 134 Hz, CH), 52.63 (<sup>1</sup>*J*<sub>CH</sub> = 148 Hz, OCH<sub>3</sub>), 52.65 (<sup>1</sup>*J*<sub>CH</sub> = 148 Hz, OCH<sub>3</sub>), 52.69 (<sup>1</sup>*J*<sub>CH</sub> = 148 Hz, OCH<sub>3</sub>), 100.92 (OCH<sub>2</sub>O), 101.07 (OCH<sub>2</sub>O), 105.24 (CH, Ar), 106.06 (CH, Ar), 107.72 (CH, Ar), 109.06 (CH, Ar), 122.83 (CH, Ar), 135.38 (C, Ar), 136.50 (C, Ar), 139.59 (C, Ar), 146.51 (C, Ar), 146.61 (C, Ar), 147.50 (C, Ar), 147.70 (C, Ar), 168.00 (CO<sub>2</sub>Me, Ar), 168.35 (CO<sub>2</sub>Me), 168.36 (CO<sub>2</sub>Me, Ar), 169.46 (CO<sub>2</sub>Me);

IR (Nujol) 2940, 2870, 1730, 1470, 1380, 1110, 1060, 950 cm<sup>-1</sup>;

ESI-HRMS: *m/z* = 579.1473 [M+K]<sup>+</sup> (calcd. 579.1462 for C<sub>28</sub>H<sub>28</sub>KO<sub>12</sub>).

**Dimethyl ((1*RS*,2*SR*,3*SR*)-3-(3,4-dimethoxyphenyl)-5,6-dimethoxy-2-[2-methoxy-1-(methoxycarbonyl)-2-oxoethyl]-2,3-dihydro-1*H*-inden-1-yl)methyl)malonate (**2c**)**

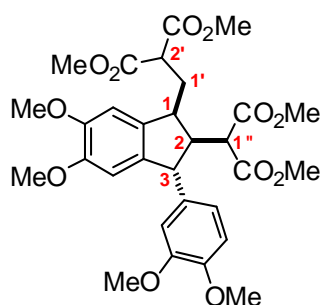

Cyclodimer **2c** was obtained *via* two alternative ways:

according to method **A** from dimethyl 2-(3,4-dimethoxyphenyl)cyclopropane-1,1-dicarboxylate (**1c**) (294 mg, 1 mmol) under catalysis by Sn(OTf)<sub>2</sub> (125 mg, 0.3 mmol), reaction time 2 h. Yield 200 mg (68%).

according to method **B** from dimethyl 2-(3,4-dimethoxyphenyl)cyclopropane-1,1-dicarboxylate (**1c**) (147 mg, 0.5 mmol) and dimethyl (*E*)-

(3,4-dimethoxystyryl)malonate (**3c**) (147 mg, 0.5 mmol) under catalysis by Sn(OTf)<sub>2</sub> (125 mg, 0.3 mmol). Yield 256 mg (87%).

White foam; *R*<sub>f</sub> 0.30 (diethyl ether); mp 78–80 °C.

<sup>1</sup>H NMR (CDCl<sub>3</sub>, 600 MHz) δ = 1.77–1.83 (m, 1H, C(1')H<sub>2</sub>), 2.04–2.12 (m, 1H, C(1')H<sub>2</sub>), 3.03 (s, 3H, OCH<sub>3</sub>), 3.30–3.38 (m, 2H, 2CH), 3.57 (dd, <sup>3</sup>*J*<sub>2',1'</sub> = 3.9, <sup>3</sup>*J*<sub>2',1'</sub> = 11.7 Hz, 1H, C(2')H), 3.68 (s, 3H, OCH<sub>3</sub>), 3.69 (s, 3H, OCH<sub>3</sub>), 3.78 (s, 3H, OCH<sub>3</sub>), 3.82 (s, 3H, OCH<sub>3</sub>), 3.86 (d, <sup>3</sup>*J*<sub>1'',2</sub> = 8.6 Hz, 1H, C(1'')H), 3.86 (s, 3H, OCH<sub>3</sub>), 3.88 (s, 3H, OCH<sub>3</sub>), 3.93 (s, 3H, OCH<sub>3</sub>), 4.00 (d, <sup>3</sup>*J*<sub>3,2</sub> = 10.2 Hz, 1H, C(3)H), 6.17 (s, 1H, Ar), 6.61 (br. s, 1H, Ar), 6.73 (dd, <sup>3</sup>*J* = 8.4, <sup>4</sup>*J* = 2.0 Hz, 1H, Ar), 6.81 (d, <sup>3</sup>*J* = 8.4 Hz, 1H, Ar), 6.89 (br. s, 1H, Ar); <sup>13</sup>C NMR (CDCl<sub>3</sub>, 150 MHz) δ = 28.71 (CH<sub>2</sub>), 42.67 (CH), 49.11 (CH), 51.28 (CH), 51.64 (CH), 51.93 (CH), 52.24 (4×OCH<sub>3</sub>), 55.43 (OCH<sub>3</sub>), 55.47 (OCH<sub>3</sub>), 55.58 (2×OCH<sub>3</sub>), 107.41 (CH, Ar), 107.87 (CH, Ar), 110.18 (CH, Ar), 111.47 (CH, Ar), 121.46 (CH, Ar), 133.56 (C, Ar), 134.81 (C, Ar), 137.85 (C, Ar), 147.43 (C, Ar), 147.58 (C, Ar), 148.30 (C, Ar), 148.43 (C, Ar), 167.61 (CO<sub>2</sub>Me, Ar), 168.07 (CO<sub>2</sub>Me), 169.01 (CO<sub>2</sub>Me, Ar), 169.09 (CO<sub>2</sub>Me);

IR (Nujol) 3000, 2950, 2840, 1730, 1490, 1410, 1220, 1200, 1110, 990 cm<sup>-1</sup>;

ESI-HRMS: *m/z* = 589.2280 [M+H]<sup>+</sup> (calcd. 589.2274 for C<sub>30</sub>H<sub>37</sub>O<sub>12</sub>).

Anal. Calcd. for C<sub>30</sub>H<sub>36</sub>O<sub>12</sub>: C, 61.22; H, 6.16. Found: C, 61.37; H, 6.09.

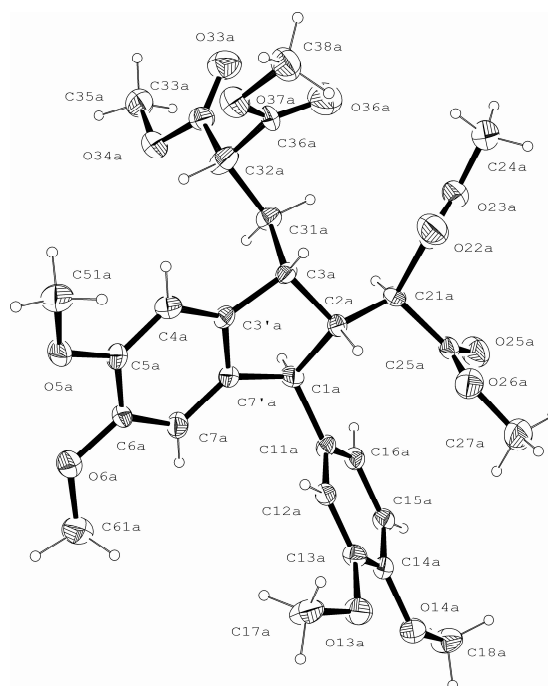

Molecular structure (ORTEP-3<sup>[S5]</sup>) from single crystal X-ray study of **2c**

**Dimethyl ((5*RS*,6*SR*,7*SR*)-7-(2,3-dihydro-1,4-benzodioxin-6-yl)-6-[2-methoxy-1-(methoxycarbonyl)-2-oxoethyl]-6,7-dihydro-5*H*-indeno[5,6-*d*][1,3]dioxol-5-yl)methyl)malonate (**2d**)**

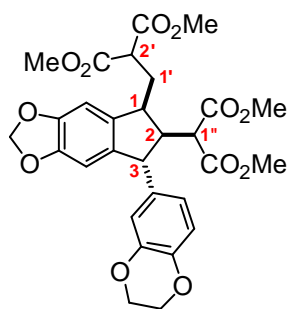

Cross-dimer **2d** was obtained according to method **B** from dimethyl 2-(1,3-benzodioxol-5-yl)cyclopropane-1,1-dicarboxylate (**1b**) (139 mg, 0.5 mmol) and dimethyl [(*E*)-2-(2,3-dihydro-1,4-benzodioxin-6-yl)vinyl]malonate (**3a**) (146 mg, 0.5 mmol) under catalysis by Sn(OTf)<sub>2</sub> (125 mg, 0.3 mmol). Yield 205 mg (72%); white foam; *R*<sub>f</sub> 0.58 (diethyl ether); mp 85–87 °C.

<sup>1</sup>H NMR (CDCl<sub>3</sub>, 600 MHz)  $\delta$  = 1.74 (ddd, <sup>2</sup>*J* = 13.4, <sup>3</sup>*J*<sub>1',2'</sub> = 3.7, <sup>3</sup>*J*<sub>1',1</sub> = 12.4 Hz, 1H, C(1')H<sub>2</sub>), 2.07 (ddd, <sup>2</sup>*J* = 13.4, <sup>3</sup>*J*<sub>1',1</sub> = 3.3, <sup>3</sup>*J*<sub>1',2'</sub> = 11.9 Hz, 1H, C(1')H<sub>2</sub>), 3.12 (s, 3H, OCH<sub>3</sub>), 3.24 (ddd, <sup>3</sup>*J*<sub>1,1'</sub> = 3.3, <sup>3</sup>*J*<sub>1,2</sub> = 6.9, <sup>3</sup>*J*<sub>1,1'</sub> = 12.4 Hz, 1H, C(1)H), 3.33 (ddd, <sup>3</sup>*J*<sub>2,1</sub> = 6.9, <sup>3</sup>*J*<sub>2,3</sub> = 10.7, <sup>3</sup>*J*<sub>2,1''</sub> = 11.0 Hz, 1H, C(2)H), 3.55 (dd, <sup>3</sup>*J*<sub>2',1'</sub> = 3.7 Hz, <sup>3</sup>*J*<sub>2',1''</sub> = 11.9 Hz, 1H, C(2')H), 3.70 (s, 3H, OCH<sub>3</sub>), 3.78 (s, 3H, OCH<sub>3</sub>), 3.79 (d, <sup>3</sup>*J*<sub>1'',2</sub> = 11.0 Hz, 1H, C(1'')H), 3.85 (s, 3H, OCH<sub>3</sub>), 4.02 (d, <sup>3</sup>*J*<sub>3,2</sub> = 10.7 Hz, 1H, C(3)H), 4.24 (s, 4H, OCH<sub>2</sub>CH<sub>2</sub>O), 5.90 (AB-system, <sup>2</sup>*J* = 13.2, OCH<sub>2</sub>O), 6.15 (br. s, 1H, Ar), 6.62 (dd, <sup>3</sup>*J* = 8.2, <sup>4</sup>*J* = 2.0 Hz, 1H, Ar), 6.64 (d, <sup>4</sup>*J* = 2.0 Hz, 1H, Ar), 6.78 (br. s, 1H, Ar), 6.79 (d, <sup>3</sup>*J* = 8.2 Hz, 1H, Ar); <sup>13</sup>C NMR (CDCl<sub>3</sub>, 150 MHz)  $\delta$  = 29.17 (<sup>1</sup>*J*<sub>CH</sub> = 131 Hz, CH<sub>2</sub>), 43.00 (<sup>1</sup>*J*<sub>CH</sub> = 136 Hz, CH), 49.22 (<sup>1</sup>*J*<sub>CH</sub> = 135 Hz, CH), 51.60 (<sup>1</sup>*J*<sub>CH</sub> = 139 Hz, CH), 51.75 (<sup>1</sup>*J*<sub>CH</sub> = 131 Hz, CH), 51.93 (<sup>1</sup>*J*<sub>CH</sub> = 147 Hz, OCH<sub>3</sub>), 52.57 (<sup>1</sup>*J*<sub>CH</sub> = 132 Hz, CH), 52.65 (<sup>1</sup>*J*<sub>CH</sub> = 148 Hz, OCH<sub>3</sub>), 52.67 (<sup>1</sup>*J*<sub>CH</sub> = 148 Hz, 2×OCH<sub>3</sub>), 64.34 (<sup>1</sup>*J*<sub>CH</sub> = 149 Hz, OCH<sub>2</sub>), 64.37 (<sup>1</sup>*J*<sub>CH</sub> = 150 Hz, OCH<sub>2</sub>), 101.05 (OCH<sub>2</sub>O), 105.20 (CH, Ar), 106.15 (CH, Ar), 116.88 (CH, Ar), 117.97 (CH, Ar), 122.22 (CH, Ar), 134.77 (C, Ar), 136.44 (C, Ar), 139.74 (C, Ar), 142.42 (C, Ar), 143.21 (C, Ar), 146.55 (C, Ar), 147.26 (C, Ar), 168.01 (CO<sub>2</sub>Me), 168.39 (CO<sub>2</sub>Me), 169.40 (CO<sub>2</sub>Me), 169.49 (CO<sub>2</sub>Me);

IR (Nujol) 2940, 2880, 1750, 1735, 1720, 1470, 1380, 1320, 1270, 1210, 1170, 1160, 1050, 950, 800, 780 cm<sup>-1</sup>;

MALDI-TOF MS: *m/z* = 593 [M+Na]<sup>+</sup> (calcd. 593 for C<sub>29</sub>H<sub>30</sub>NaO<sub>12</sub>);

Anal. Calcd. for C<sub>29</sub>H<sub>30</sub>O<sub>12</sub>: C, 61.05; H, 5.30. Found: C, 61.21; H, 5.30.

**Dimethyl ((1*RS*,2*SR*,3*SR*)-3-(2,3-dihydro-1,4-benzodioxin-6-yl)-5,6,7-trimethoxy-2-[2-methoxy-1-(methoxycarbonyl)-2-oxoethyl]-2,3-dihydro-1*H*-inden-1-yl)methyl)malonate (**2e**)**

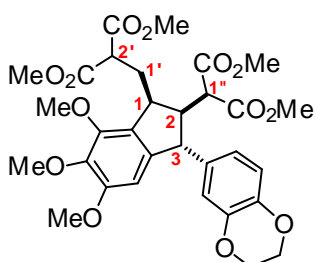

(**2e**)

Cross-dimer **2e** was obtained according to method **B** from dimethyl 2-(2,3,4-trimethoxyphenyl)cyclopropane-1,1-dicarboxylate (**1d**) (162 mg, 0.5 mmol) and dimethyl [(*E*)-2-(2,3-dihydro-1,4-benzodioxin-6-



yl)vinyl]malonate (**3a**) (146 mg, 0.5 mmol) under catalysis by Sn(OTf)<sub>2</sub> (125 mg, 0.3 mmol). Yield 225 mg (73%); white foam; *R*<sub>f</sub> 0.65 (diethyl ether); mp 84–85 °C.

<sup>1</sup>H NMR (CDCl<sub>3</sub>, 600 MHz)  $\delta$  = 1.62–1.68 (m, 1H, C(1')H<sub>2</sub>), 2.10–2.17 (m, 1H, C(1')H<sub>2</sub>), 3.09 (s, 3H, OCH<sub>3</sub>), 3.27 (ddd, <sup>3</sup>*J*<sub>3,2</sub> = 6.8, <sup>3</sup>*J* = 11.2, <sup>3</sup>*J* = 11.4 Hz, 1H, C(2)H), 3.62 (s, 6H, OCH<sub>3</sub>), 3.64–3.69 (m, 2H, CH), 3.73 (d, <sup>3</sup>*J*<sub>1'',2</sub> = 12.0 Hz, 1H, C(1'')H), 3.77 (s, 3H, OCH<sub>3</sub>), 3.79 (s, 3H, OCH<sub>3</sub>), 3.81 (s, 3H, OCH<sub>3</sub>), 3.84 (s, 3H, OCH<sub>3</sub>), 4.01 (d, <sup>3</sup>*J*<sub>3,2</sub> = 11.0 Hz, 1H, C(3)H), 4.18–4.22 (m, 4H, OCH<sub>2</sub>CH<sub>2</sub>O), 5.93 (br. s, 1H, CH, Ar), 6.59 (br. d, <sup>3</sup>*J* = 8.1 Hz, 1H, Ar), 6.62 (br. s, 1H, CH, Ar), 6.75 (d, <sup>3</sup>*J* = 8.1 Hz, 1H, Ar);

<sup>13</sup>C NMR (CDCl<sub>3</sub>, 150 MHz)  $\delta$  = 29.43 (<sup>1</sup>*J*<sub>CH</sub> = 130 Hz, CH<sub>2</sub>), 40.71 (<sup>1</sup>*J*<sub>CH</sub> = 137 Hz, CH), 49.19 (<sup>1</sup>*J*<sub>CH</sub> = 134 Hz, CH), 51.78 (<sup>1</sup>*J*<sub>CH</sub> = 137 Hz, CH), 51.87 (<sup>1</sup>*J*<sub>CH</sub> = 147 Hz, OCH<sub>3</sub>), 52.29 (<sup>1</sup>*J*<sub>CH</sub> = 147 Hz, OCH<sub>3</sub>), 52.34 (<sup>1</sup>*J*<sub>CH</sub> = 137 Hz, CH), 52.47 (<sup>1</sup>*J*<sub>CH</sub> = 147 Hz, OCH<sub>3</sub>), 52.75 (<sup>1</sup>*J*<sub>CH</sub> = 134 Hz, CH), 52.79 (<sup>1</sup>*J*<sub>CH</sub> = 148 Hz, OCH<sub>3</sub>), 56.15 (<sup>1</sup>*J*<sub>CH</sub> = 144 Hz, OCH<sub>3</sub>), 60.73 (<sup>1</sup>*J*<sub>CH</sub> = 145 Hz, OCH<sub>3</sub>), 60.89 (<sup>1</sup>*J*<sub>CH</sub> = 143 Hz, OCH<sub>3</sub>), 64.30 (<sup>1</sup>*J*<sub>CH</sub> = 148 Hz, OCH<sub>2</sub>), 64.34 (<sup>1</sup>*J*<sub>CH</sub> = 148 Hz, OCH<sub>2</sub>), 104.45 (CH, Ar), 116.82 (CH, Ar), 118.16 (CH, Ar), 122.36 (CH, Ar), 128.85 (C, Ar), 134.36 (C, Ar), 140.47 (C, Ar), 142.37 (2×C, Ar), 143.11 (C, Ar), 148.92 (C, Ar), 153.57 (C, Ar), 167.97 (CO<sub>2</sub>Me), 168.31 (CO<sub>2</sub>Me), 169.45 (CO<sub>2</sub>Me), 170.35 (CO<sub>2</sub>Me);

IR (Nujol) 2980, 2950, 2870, 1750, 1740, 1590, 1510, 1470, 1380, 1290, 1170, 1130, 1080, 730 cm<sup>-1</sup>;

MALDI-TOF MS: *m/z* = 616 [M]<sup>+</sup> (calcd. 616 for C<sub>31</sub>H<sub>36</sub>O<sub>13</sub>);

Anal. Calcd. for C<sub>31</sub>H<sub>36</sub>O<sub>13</sub>: C, 60.38; H, 5.88. Found: C, 60.25; H, 5.74.

**Dimethyl**                      **{[(6*RS*,7*SR*,8*SR*)-7-[2-methoxy-1-(methoxycarbonyl)-2-oxoethyl]-8-(4-methoxyphenyl)-2,3,7,8-tetrahydro-6*H*-indeno[5,6-*b*][1,4]dioxin-6-yl)methyl]malonate (2f)**

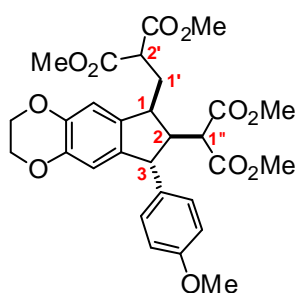

Cross-dimer **2f** was obtained according to method **B** from dimethyl 2-(2,3-dihydro-1,4-benzodioxin-6-yl)cyclopropane-1,1-dicarboxylate (**1a**) (146 mg, 1 mmol) and dimethyl (*E*)-2-(4-methoxystyryl)malonate (**3b**) (132 mg, 0.5 mmol) under catalysis by Sn(OTf)<sub>2</sub> (125 mg, 0.3 mmol). Yield 214 mg (77%); white foam; *R*<sub>f</sub> 0.7 (diethyl ether); mp 152–153 °C.

<sup>1</sup>H NMR (CDCl<sub>3</sub>, 600 MHz)  $\delta$  = 1.73 (ddd, <sup>2</sup>*J* = 13.0, <sup>3</sup>*J*<sub>1',2'</sub> = 3.6, <sup>3</sup>*J*<sub>1',1</sub> = 12.5 Hz, 1H, C(1')H<sub>2</sub>), 2.06 (ddd, <sup>2</sup>*J* = 13.0, <sup>3</sup>*J*<sub>1',1</sub> = 3.4, <sup>3</sup>*J*<sub>1',2'</sub> = 11.8 Hz, 1H, C(1')H<sub>2</sub>), 2.98 (s, 3H, OCH<sub>3</sub>), 3.24 (ddd, <sup>3</sup>*J*<sub>1,1'</sub> = 3.4, <sup>3</sup>*J*<sub>1,2</sub> = 6.9, <sup>3</sup>*J*<sub>1,1'</sub> = 12.5 Hz, 1H, C(1)H), 3.33 (ddd, <sup>3</sup>*J*<sub>2,1</sub> = 6.9, <sup>3</sup>*J*<sub>2,3</sub> = 10.7, <sup>3</sup>*J*<sub>2,1''</sub> = 11.0 Hz, 1H, C(2)H), 3.54 (dd, <sup>3</sup>*J*<sub>2',1'</sub> = 3.6, <sup>3</sup>*J*<sub>2',1'</sub> = 11.8 Hz, 1H, C(2')H), 3.68 (s, 3H, OCH<sub>3</sub>), 3.75 (d, <sup>3</sup>*J*<sub>1'',2</sub> = 11.0 Hz, 1H, C(1'')H), 3.76 (s, 3H, OCH<sub>3</sub>), 3.78 (s, 3H, OCH<sub>3</sub>),

3.83 (s, 3H, OCH<sub>3</sub>), 4.06 (d, <sup>3</sup>J<sub>3,2</sub> = 10.7 Hz, 1H, C(3)H), 4.15–4.21 (m, 4H, OCH<sub>2</sub>CH<sub>2</sub>O), 6.12 (br. s, 1H, Ar), 6.79 (br. s, 1H, Ar), 6.81 (d, <sup>3</sup>J = 8.6 Hz, 2H, Ar), 7.04 (d, <sup>3</sup>J = 8.6 Hz, 2H, Ar);  
<sup>13</sup>C NMR (CDCl<sub>3</sub>, 150 MHz) δ = 28.93 (<sup>1</sup>J<sub>CH</sub> = 131 Hz, CH<sub>2</sub>), 42.75 (<sup>1</sup>J<sub>CH</sub> = 137 Hz, CH), 49.16 (<sup>1</sup>J<sub>CH</sub> = 132 Hz, CH), 51.31 (<sup>1</sup>J<sub>CH</sub> = 139 Hz, CH), 51.45 (<sup>1</sup>J<sub>CH</sub> = 131 Hz, CH), 51.96 (<sup>1</sup>J<sub>CH</sub> = 147 Hz, OCH<sub>3</sub>), 52.57 (<sup>1</sup>J<sub>CH</sub> = 131 Hz, CH), 52.59 (<sup>1</sup>J<sub>CH</sub> = 148 Hz, OCH<sub>3</sub>), 52.65 (<sup>1</sup>J<sub>CH</sub> = 148 Hz, OCH<sub>3</sub>), 52.69 (<sup>1</sup>J<sub>CH</sub> = 148 Hz, OCH<sub>3</sub>), 55.25 (<sup>1</sup>J<sub>CH</sub> = 144 Hz, OCH<sub>3</sub>), 64.19 (<sup>1</sup>J<sub>CH</sub> = 147 Hz, OCH<sub>2</sub>), 64.24 (<sup>1</sup>J<sub>CH</sub> = 147 Hz, OCH<sub>2</sub>), 113.27 (CH, Ar), 113.61 (2×CH, Ar), 114.03 (CH, Ar), 130.23 (2×CH, Ar), 133.46 (C, Ar), 136.27 (C, Ar), 139.99 (C, Ar), 142.27 (C, Ar), 143.13 (C, Ar), 158.49 (C, Ar), 168.02 (CO<sub>2</sub>Me), 168.39 (CO<sub>2</sub>Me), 169.41 (CO<sub>2</sub>Me), 169.54 (CO<sub>2</sub>Me);  
IR (Nujol) 2980, 2950, 2870, 1735, 1470, 1380, 1330, 1310, 1250, 1220, 1170, 1080, 1050, 740 cm<sup>-1</sup>;  
MALDI-TOF MS: *m/z* = 579 [M+Na]<sup>+</sup> (calcd. 579 for C<sub>29</sub>H<sub>32</sub>NaO<sub>11</sub>);  
Anal. Calcd. for C<sub>29</sub>H<sub>32</sub>O<sub>11</sub>: C, 62.58; H, 5.80. Found: C, 62.42; H, 5.73.

**Dimethyl ((1*RS*,2*SR*,3*SR*)-4,5,6-trimethoxy-2-[2-methoxy-1-(methoxycarbonyl)-2-oxoethyl]-3-(4-methoxyphenyl)-2,3-dihydro-1*H*-inden-1-yl)methylmalonate (2g)**

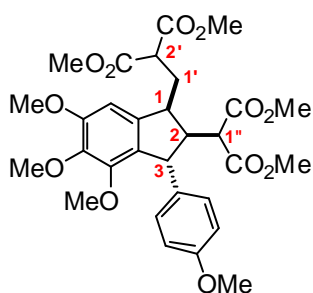

Cross-dimer **2g** was obtained according to method **B** from dimethyl 2-(3,4,5-trimethoxyphenyl)cyclopropane-1,1-dicarboxylate (**1e**) (162 mg, 1 mmol) and dimethyl (*E*)-2-(4-methoxystyryl)malonate (**3b**) (132 mg, 0.5 mmol) under catalysis by Sn(OTf)<sub>2</sub> (125 mg, 0.3 mmol). Yield 238 mg (81%); white foam; *R*<sub>f</sub> 0.32 (diethyl ether : petroleum ether); mp 51-53 °C.

<sup>1</sup>H NMR (CDCl<sub>3</sub>, 600 MHz) δ = 1.81–1.86 (m, 1H, C(1')H<sub>2</sub>), 2.04–2.09 (m, 1H, C(1')H<sub>2</sub>), 3.03 (s, 3H, OCH<sub>3</sub>), 3.15 (s, 3H, OCH<sub>3</sub>), 3.26–3.32 (m, 2H, CH), 3.47 (dd, <sup>3</sup>J<sub>2',1'</sub> = 5.0, <sup>3</sup>J<sub>2',1'</sub> = 10.6 Hz, 1H, C(2')H), 3.65 (s, 3H, OCH<sub>3</sub>), 3.70 (d, <sup>3</sup>J<sub>1'',2</sub> = 9.5 Hz, 1H, C(1'')H), 3.74 (s, 9H, OCH<sub>3</sub>), 3.80 (s, 3H, OCH<sub>3</sub>), 3.86 (s, 3H, OCH<sub>3</sub>), 4.27 (d, <sup>3</sup>J<sub>3,2</sub> = 7.9 Hz, 1H, C(3)H), 6.62 (br. s, 1H, Ar), 6.78 (d, <sup>3</sup>J = 8.4 Hz, 2H, Ar), 7.08 (d, <sup>3</sup>J = 8.4 Hz, 2H, Ar);  
<sup>13</sup>C NMR (CDCl<sub>3</sub>, 150 MHz) δ = 29.05 (<sup>1</sup>J<sub>CH</sub> = 131 Hz, CH<sub>2</sub>), 44.56 (<sup>1</sup>J<sub>CH</sub> = 136 Hz, CH), 49.56 (<sup>1</sup>J<sub>CH</sub> = 136 Hz, CH), 49.99 (<sup>1</sup>J<sub>CH</sub> = 131 Hz, CH), 51.67 (<sup>1</sup>J<sub>CH</sub> = 139 Hz, CH), 52.01 (<sup>1</sup>J<sub>CH</sub> = 147 Hz, OCH<sub>3</sub>), 52.12 (<sup>1</sup>J<sub>CH</sub> = 134 Hz, CH), 52.64 (<sup>1</sup>J<sub>CH</sub> = 148 Hz, 3×OCH<sub>3</sub>), 55.22 (<sup>1</sup>J<sub>CH</sub> = 144 Hz, OCH<sub>3</sub>), 56.10 (<sup>1</sup>J<sub>CH</sub> = 144 Hz, OCH<sub>3</sub>), 59.68 (<sup>1</sup>J<sub>CH</sub> = 144 Hz, OCH<sub>3</sub>), 60.62 (<sup>1</sup>J<sub>CH</sub> = 144 Hz, OCH<sub>3</sub>), 103.46 (CH, Ar), 113.27 (2×CH, Ar), 129.66 (2×CH, Ar), 130.10 (C, Ar), 134.83 (C, Ar), 139.44 (C, Ar), 141.74 (C, Ar), 150.50 (C, Ar), 153.18 (C, Ar), 158.17 (C, Ar), 168.12 (CO<sub>2</sub>Me), 168.71 (CO<sub>2</sub>Me), 169.42 (CO<sub>2</sub>Me), 169.46 (CO<sub>2</sub>Me);

IR (film) 2980, 2950, 2900, 2870, 1750, 1740, 1470, 1460, 1380, 1310, 1260, 1180, 1125, 1050, 735  $\text{cm}^{-1}$ ;

MALDI-TOF MS:  $m/z = 611$   $[\text{M}+\text{Na}]^+$  (calcd. 611 for  $\text{C}_{30}\text{H}_{36}\text{NaO}_{12}$ );

Anal. Calcd. for  $\text{C}_{30}\text{H}_{36}\text{O}_{12}$ : C, 61.22; H, 6.16. Found: C, 61.29; H, 6.18.

**Dimethyl**                      **{[(4*RS*,5*RS*,6*SR*)-5-[2-methoxy-1-(methoxycarbonyl)-2-oxoethyl]-4-(4-methoxyphenyl)-2-methyl-5,6-dihydro-4*H*-cyclopenta[*b*]thien-6-yl]methyl}malonate (**2h**)**

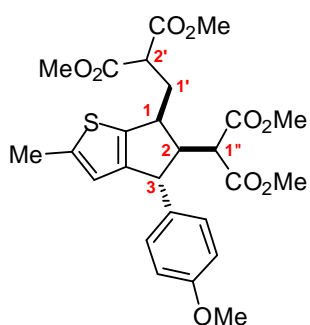

Cross-dimer **2h** was obtained according to method **B** from dimethyl 2-(5-methylthiophen-2-yl)cyclopropane-1,1-dicarboxylate (**1f**) (127 mg, 1 mmol) and dimethyl (*E*)-2-(4-methoxystyryl)malonate (**3b**) (132 mg, 0.5 mmol) under catalysis by  $\text{Sn}(\text{OTf})_2$  (125 mg, 0.3 mmol). Yield 153 mg (59%); yellowish foam;  $R_f$  0.75 (diethyl ether); mp 57-59 °C.

$^1\text{H}$  NMR ( $\text{CDCl}_3$ , 600 MHz)  $\delta = 1.78$  (ddd,  $^2J = 12.8$ ,  $^3J_{1',2'} = 3.5$ ,  $^3J_{1',1} = 12.5$  Hz, 1H, C(1')H<sub>2</sub>), 2.05 (ddd,  $^2J = 12.8$ ,  $^3J_{1',1} = 3.2$ ,  $^3J_{1',2'} = 12.3$  Hz, 1H, C(1')H<sub>2</sub>), 2.36 (s, 3H, CH<sub>3</sub>), 3.03 (s, 3H, OCH<sub>3</sub>), 3.40–3.44 (m, 1H, CH), 3.57–3.62 (m, 1H, CH), 3.67 (dd,  $^3J_{2',1'} = 3.5$ ,  $^3J_{2',1'} = 12.3$  Hz, 1H, C(2')H), 3.70 (s, 3H, OCH<sub>3</sub>), 3.75 (s, 3H, OCH<sub>3</sub>), 3.77 (s, 3H, OCH<sub>3</sub>), 3.79 (d,  $^3J_{1'',2} = 11.6$  Hz, 1H, C(1'')H), 3.82 (s, 3H, OCH<sub>3</sub>), 4.03 (d,  $^3J_{3,2} = 9.6$  Hz, 1H, C(3)H), 6.06 (br. s, 1H, Th), 6.81 (d,  $^3J = 8.6$  Hz, 2H, Ar), 7.07 (d,  $^3J = 8.6$  Hz, 2H, Ar);

$^{13}\text{C}$  NMR ( $\text{CDCl}_3$ , 150 MHz)  $\delta = 15.91$  ( $^1J_{\text{CH}} = 128$  Hz, CH<sub>3</sub>), 29.89 ( $^1J_{\text{CH}} = 131$  Hz, CH<sub>2</sub>), 41.57 ( $^1J_{\text{CH}} = 138$  Hz, CH), 48.94 ( $^1J_{\text{CH}} = 133$  Hz, CH), 49.64 ( $^1J_{\text{CH}} = 131$  Hz, CH), 52.02 ( $^1J_{\text{CH}} = 148$  Hz, OCH<sub>3</sub>), 52.60 ( $^1J_{\text{CH}} = 147$  Hz, OCH<sub>3</sub>), 52.63 ( $^1J_{\text{CH}} = 148$  Hz, OCH<sub>3</sub>), 52.72 ( $^1J_{\text{CH}} = 148$  Hz, OCH<sub>3</sub>), 52.79 ( $^1J_{\text{CH}} = 131$  Hz, CH), 55.13 ( $^1J_{\text{CH}} = 137$  Hz, CH), 55.24 ( $^1J_{\text{CH}} = 144$  Hz, OCH<sub>3</sub>), 113.55 (2×CH, Ar), 120.35 (CH, Ar), 129.62 (2×CH, Ar), 133.72 (C, Ar), 138.99 (C, Ar), 142.88 (C, Ar), 148.91 (C, Ar), 158.45 (C, Ar), 167.84 (CO<sub>2</sub>Me), 168.36 (CO<sub>2</sub>Me), 169.25 (CO<sub>2</sub>Me), 169.40 (CO<sub>2</sub>Me);

IR (film) 3020, 2965, 2860, 1760, 1740, 1610, 1520, 1450, 1310, 1270, 1160, 1040, 840, 805, 770  $\text{cm}^{-1}$ ;

MALDI-TOF MS:  $m/z = 541$   $[\text{M}+\text{Na}]^+$  (calcd. 541 for  $\text{C}_{26}\text{H}_{30}\text{NaO}_9\text{S}$ );

Anal. Calcd. for  $\text{C}_{26}\text{H}_{30}\text{O}_9\text{S}$ : C, 60.22; H, 5.83. Found: C, 60.20; H, 6.06.

**Dimethyl** **{[(1*RS*,2*SR*,3*SR*)-2-[2-methoxy-1-(methoxycarbonyl)-2-oxoethyl]-1-(4-methoxyphenyl)-2,3-dihydro-1*H*-benzo[*b*]cyclopenta[*d*]furan-3-yl]methyl}malonate (2i)**

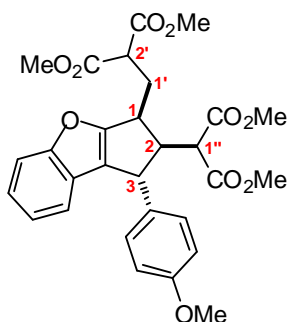

Cross-dimer **2i** was obtained according to method **B** from dimethyl 2-(1-benzofuran-2-yl)cyclopropane-1,1-dicarboxylate (**1g**) (137 mg, 1 mmol) and dimethyl (*E*)-2-(4-methoxystyryl)malonate (**3b**) (132 mg, 0.5 mmol) under catalysis by Sn(OTf)<sub>2</sub> (125 mg, 0.3 mmol). Yield 113 mg (42%); yellowish foam; *R*<sub>f</sub> 0.35 (diethyl ether); mp 118–120 °C.

<sup>1</sup>H NMR (CDCl<sub>3</sub>, 600 MHz)  $\delta$  = 1.94 (ddd, <sup>2</sup>*J* = 13.1, <sup>3</sup>*J*<sub>1',2'</sub> = 3.5, <sup>3</sup>*J*<sub>1',1</sub> = 12.2 Hz, 1H, C(1')H<sub>2</sub>), 2.18 (ddd, <sup>2</sup>*J* = 13.1, <sup>3</sup>*J*<sub>1',1</sub> = 3.4, <sup>3</sup>*J*<sub>1',2'</sub> = 11.2 Hz, 1H, C(1')H<sub>2</sub>), 3.13 (s, 3H, OCH<sub>3</sub>), 3.59–3.63 (m, 1H, C(1)H), 3.72–3.76 (m, 1H, C(2)H), 3.70 (s, 3H, OCH<sub>3</sub>), 3.76 (dd, <sup>3</sup>*J*<sub>2',1'</sub> = 3.5, <sup>3</sup>*J*<sub>2',1'</sub> = 11.2 Hz, 1H, C(2')H), 3.795 (s, 3H, OCH<sub>3</sub>), 3.803 (s, 3H, OCH<sub>3</sub>), 3.83 (s, 3H, OCH<sub>3</sub>), 3.85 (d, <sup>3</sup>*J*<sub>1'',2</sub> = 11.4 Hz, 1H, C(1'')H), 4.23 (d, <sup>3</sup>*J*<sub>3,2</sub> = 8.7, <sup>5</sup>*J* = 1.6 Hz, 1H, C(3)H), 6.82 (br. d, <sup>3</sup>*J* = 8.2 Hz, 1H, CH, Ar), 6.84 (d, <sup>3</sup>*J* = 8.7 Hz, 2H, Ar), 7.04 (dd, <sup>3</sup>*J* = 7.8 Hz, <sup>3</sup>*J* = 8.2 Hz, 1H, Ar), 7.18 (d, <sup>3</sup>*J* = 8.7 Hz, 2H, Ar), 7.17–7.21 (m, 1H, Ar), 7.46 (br. d, <sup>3</sup>*J* = 8.2 Hz, 1H, CH, Ar);

<sup>13</sup>C NMR (CDCl<sub>3</sub>, 150 MHz)  $\delta$  = 29.36 (<sup>1</sup>*J*<sub>CH</sub> = 133 Hz, CH<sub>2</sub>), 38.93 (<sup>1</sup>*J*<sub>CH</sub> = 141 Hz, CH), 44.87 (<sup>1</sup>*J*<sub>CH</sub> = 132 Hz, CH), 49.67 (<sup>1</sup>*J*<sub>CH</sub> = 134 Hz, CH), 52.16 (<sup>1</sup>*J*<sub>CH</sub> = 148 Hz, OCH<sub>3</sub>), 52.66 (<sup>1</sup>*J*<sub>CH</sub> = 134 Hz, CH), 52.69 (<sup>1</sup>*J*<sub>CH</sub> = 148 Hz, OCH<sub>3</sub>), 52.71 (<sup>1</sup>*J*<sub>CH</sub> = 148 Hz, OCH<sub>3</sub>), 52.84 (<sup>1</sup>*J*<sub>CH</sub> = 148 Hz, OCH<sub>3</sub>), 54.74 (<sup>1</sup>*J*<sub>CH</sub> = 137 Hz, CH), 55.25 (<sup>1</sup>*J*<sub>CH</sub> = 144 Hz, OCH<sub>3</sub>), 112.03 (CH, Ar), 113.71 (2×CH, Ar), 119.11 (CH, Ar), 122.80 (CH, Ar), 123.35 (CH, Ar), 123.76 (C, Ar), 125.10 (C, Ar), 129.44 (2×CH, Ar), 132.72 (C, Ar), 158.62 (C, Ar), 159.81 (C, Ar), 162.24 (C, Ar), 167.71 (CO<sub>2</sub>Me), 168.35 (CO<sub>2</sub>Me), 169.17 (CO<sub>2</sub>Me), 169.28 (CO<sub>2</sub>Me);

IR (Nujol) 2970, 2950, 2870, 1760, 1740, 1470, 1450, 1270, 1160, 1050, 800, 770 cm<sup>-1</sup>;

MALDI-TOF MS: *m/z* = 561 [M+Na]<sup>+</sup> (calcd. 561 for C<sub>29</sub>H<sub>30</sub>NaO<sub>10</sub>);

Anal. Calcd. for C<sub>29</sub>H<sub>30</sub>O<sub>10</sub>: C, 64.68; H, 5.61. Found: C, 64.62; H, 5.37.

**Dimethyl (*E*)-(3,4-dimethoxystyryl)malonate (3c)**

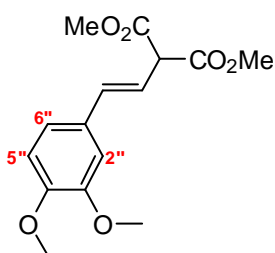

Sn(OTf)<sub>2</sub> (33 mg, 10 mol%) was added to a preheated up to 110 °C (oil bath) and vigorously stirred solution of cyclopropane **1c** (230 mg, 0.79 mmol) in chlorobenzene (10 mL) containing molecular sieves 4 Å under argon atmosphere. The resulting mixture was stirred at this temperature for 2.5 h, allowed to cool to room temperature and poured into saturated aqueous solution of NaHCO<sub>3</sub> (10 mL). After extraction with CH<sub>2</sub>Cl<sub>2</sub> (3×5 mL), the combined organic fractions were washed with aqueous solution of Trilon B (3×5 mL) and water (2×5 mL).

The organic layer was then dried with Na<sub>2</sub>SO<sub>4</sub>. The solvent was evaporated under vacuum, and the residue was purified by column chromatography (SiO<sub>2</sub>, eluent: diethyl ether : petroleum ether, 2:1) to yield **3c** (145 mg, 63%) as white solid; mp 73–75 °C; *R*<sub>f</sub> 0.40 (diethyl ether: petroleum ether, 1:1).

<sup>1</sup>H NMR (CDCl<sub>3</sub>, 600 MHz) δ 3.79 (s, 6H, 2×OCH<sub>3</sub>), 3.89 (s, 3H, OCH<sub>3</sub>), 3.91 (s, 3H, OCH<sub>3</sub>), 4.21 (d, <sup>3</sup>*J* = 9.2 Hz, 1H, C(2)H), 6.27 (dd, <sup>3</sup>*J* = 15.8, <sup>3</sup>*J* = 9.2 Hz, 1H, C(1')H), 6.53 (d, <sup>3</sup>*J* = 15.8 Hz, 1H, C(2')H), 6.81 (d, <sup>3</sup>*J* = 8.3 Hz, 1H, C(5'')H), 6.93 (dd, <sup>3</sup>*J* = 8.3, <sup>4</sup>*J* = 2.0 Hz, 1H, C(6'')H), 6.98 (d, <sup>4</sup>*J* = 2.0 Hz, 1H, C(2'')H); <sup>13</sup>C NMR (CDCl<sub>3</sub>, 150 MHz) δ 52.83 (<sup>1</sup>*J*<sub>CH</sub> = 148 Hz, 2×OCH<sub>3</sub>), 55.56 (<sup>1</sup>*J*<sub>CH</sub> = 133 Hz, CH), 55.88 (OCH<sub>3</sub>), 55.92 (OCH<sub>3</sub>), 108.78 (CH), 111.04 (CH), 118.52 (CH), 120.21 (CH), 129.08 (C, Ar), 135.01 (CH, Ar), 149.10 (C, Ar), 149.34 (C, Ar), 168.55 (2×CO<sub>2</sub>Me);

IR (Nujol) 3008, 2956, 2838, 1747, 1727, 1514, 1520, 1464, 1433, 1309, 1267, 1191, 1157, 1141, 1020, 968, 804 cm<sup>-1</sup>;

ESI-MS: *m/z* (%) = 295 [M+H]<sup>+</sup> (calcd. 295 for C<sub>15</sub>H<sub>19</sub>O<sub>6</sub>);

Anal. Calcd. for C<sub>15</sub>H<sub>18</sub>O<sub>6</sub>: C, 61.22; H, 6.16. Found: C, 61.67; H, 5.79.

## Cell assays

### HEK-293, MCF7 and SiHa cell lines

The cytotoxicity of tested compounds was assessed using the MTT (3-(4,5-dimethylthiazol-2-yl)-2,5-diphenyltetrazolium bromide) assay<sup>[S6]</sup> with some modifications. 4000 cells per well were plated out in 100 mL of DMEM media containing 10% FBS in 96-well plate and incubated at 37 °C in 5% CO<sub>2</sub> incubator for 24 h. Then 10 mL of water-DMSO solution of tested compound was added to the cells (DMSO concentration in the media was kept below 1%) in such way that effective concentrations of studied compounds were in a range of 50 nM to 100 mM (eight dilutions). Doxorubicin (3 nM to 6 mM) was used as a control. After incubation for 72 h 10 mL MTT solution in PBS (5 mg/ml) was added, cells were incubated for 2 h. Medium was removed and 100 mL of DMSO was added. Samples were incubated for 15 min with shaking to completely solubilize formazan. Cell survival was measured spectrophotometrically at 565 nm.

### MDA-MB-231-EGFP and MCF10A cell lines

MDA-MB-231-EGFP and MCF10A cells were seeded 10K and 5K (respectively) per well in 100  $\mu$ L in central 10 columns of 96-well plates. PBS was added to outer 2 columns of plates. Plates were incubated at 37 °C overnight. The next day, 9 serial dilutions of each inhibitor were made in appropriate media at 2X the desired final concentration. 100  $\mu$ L of media (for control) or inhibitor dilution was added to appropriate wells (Final concentrations: 100  $\mu$ M, 50  $\mu$ M, 10  $\mu$ M, 5  $\mu$ M, 1  $\mu$ M, 500 nM, 100 nM, 50 nM, 10 nM, 0 nM = control). Plates were incubated at 37 °C for 48 hours. Plates were taken from the incubator, media was removed and excess media was removed by aggressively patting dry. 100  $\mu$ L of 1% Methylene Blue in 50% methanol: 50% water was added to each well. Plates were incubated on rocker at room temperature for 5 minutes to fix and stain cells. Stain was removed and plates were submerged in distilled water to rinse 6 times, changing the water after the third rinse. Plates were air-dried on the benchtop. 100  $\mu$ L of 1% SDS in PBS was added to each well and placed on rocker to solubilize cells until uniform color was reached. The absorbance of each plate was read at 650 nm. Background absorbance of 1% SDS in PBS only was subtracted from each value. IC<sub>50</sub> was determined using Four Parameter Logistic Standard Curves Analysis in SigmaPlot Data Analysis Software.

**Table** Cytotoxicity of dimers **2a-i**

| <b>2</b> | IC <sub>50</sub> |      |                |                |
|----------|------------------|------|----------------|----------------|
|          | HEK-293          | MCF7 | SiHa           | MDA Mb-231     |
| <b>a</b> | 8.7              | 24.5 | - <sup>a</sup> | 33.5           |
| <b>b</b> | 13.2             | 31.7 | 55.0           | 35.1           |
| <b>c</b> | 43               | 91.4 | 59.0           | - <sup>a</sup> |
| <b>d</b> | 12.6             | 48.3 | - <sup>a</sup> | - <sup>a</sup> |
| <b>e</b> | - <sup>a</sup>   | 44.0 | - <sup>b</sup> | - <sup>b</sup> |
| <b>f</b> | - <sup>a</sup>   | 88.2 | - <sup>b</sup> | - <sup>a</sup> |
| <b>g</b> | 75.9             | 62.7 | - <sup>b</sup> | - <sup>b</sup> |
| <b>h</b> | - <sup>a</sup>   | 53.5 | - <sup>b</sup> | - <sup>b</sup> |
| <b>i</b> | - <sup>a</sup>   | 61.4 | - <sup>a</sup> | - <sup>b</sup> |

<sup>a</sup> IC<sub>50</sub> > 100  $\mu$ M. <sup>b</sup> Not tested.

## Results of geometry optimization for two diastereomers of 2c at B3LYP/6-311G\*\* level

### 1,2-*cis*-2,3-*trans*-2c

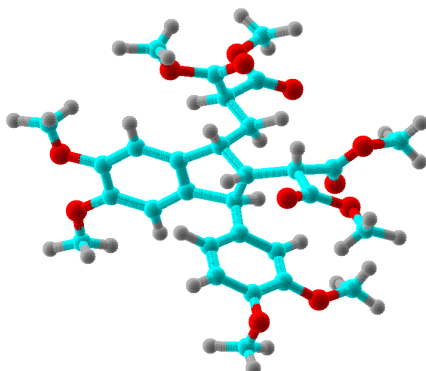

E = -2068.0821428 (rel E = 0 kJ/mol)

Standard orientation:

| Center Number | Atomic Number | Atomic Type | Coordinates (Angstroms) |           |           |
|---------------|---------------|-------------|-------------------------|-----------|-----------|
|               |               |             | X                       | Y         | Z         |
| 1             | 6             | 0           | 2.382150                | -1.753874 | -1.683798 |
| 2             | 6             | 0           | 2.417314                | -3.068931 | -1.236604 |
| 3             | 6             | 0           | 1.409514                | -3.542352 | -0.352852 |
| 4             | 6             | 0           | 0.400954                | -2.684042 | 0.069121  |
| 5             | 6             | 0           | 0.394665                | -1.356415 | -0.371506 |
| 6             | 6             | 0           | 1.370856                | -0.895789 | -1.236301 |
| 7             | 6             | 0           | -0.582244               | -0.259379 | 0.019007  |
| 8             | 6             | 0           | 1.222638                | 0.582807  | -1.521020 |
| 9             | 6             | 0           | -0.239500               | 0.870053  | -1.015652 |
| 10            | 6             | 0           | -2.037463               | -0.705449 | 0.033663  |
| 11            | 6             | 0           | -2.813016               | -0.545442 | 1.191995  |
| 12            | 6             | 0           | -4.145821               | -0.941781 | 1.239003  |
| 13            | 6             | 0           | -4.735154               | -1.537202 | 0.099423  |
| 14            | 6             | 0           | -3.962873               | -1.708845 | -1.045536 |
| 15            | 6             | 0           | -2.627802               | -1.297221 | -1.078006 |
| 16            | 8             | 0           | 3.379026                | -3.976674 | -1.565694 |
| 17            | 8             | 0           | 1.533463                | -4.845957 | 0.024566  |
| 18            | 6             | 0           | 2.369708                | 1.428088  | -0.915315 |
| 19            | 6             | 0           | -0.483686               | 2.314705  | -0.528677 |
| 20            | 8             | 0           | -4.964724               | -0.785580 | 2.316449  |
| 21            | 8             | 0           | -6.043975               | -1.894165 | 0.226448  |
| 22            | 6             | 0           | 4.430208                | -3.548587 | -2.421382 |
| 23            | 6             | 0           | 0.540170                | -5.389249 | 0.879320  |
| 24            | 6             | 0           | -6.681190               | -2.501124 | -0.885665 |
| 25            | 6             | 0           | -4.426748               | -0.172688 | 3.480702  |
| 26            | 6             | 0           | -0.328914               | 3.319240  | -1.671830 |
| 27            | 8             | 0           | -0.133008               | 3.050819  | -2.829382 |
| 28            | 8             | 0           | -0.438198               | 4.575306  | -1.201899 |
| 29            | 6             | 0           | -0.323601               | 5.625268  | -2.179767 |
| 30            | 6             | 0           | -1.853284               | 2.505299  | 0.121849  |
| 31            | 8             | 0           | -2.042134               | 2.586311  | 1.309666  |
| 32            | 8             | 0           | -2.824037               | 2.564280  | -0.804967 |
| 33            | 6             | 0           | -4.168583               | 2.725818  | -0.313002 |
| 34            | 6             | 0           | 2.714854                | 1.169158  | 0.566920  |
| 35            | 6             | 0           | 3.729073                | 0.037508  | 0.734694  |

|    |   |   |           |           |           |
|----|---|---|-----------|-----------|-----------|
| 36 | 8 | 0 | 4.724428  | -0.087891 | 0.064951  |
| 37 | 8 | 0 | 3.374607  | -0.794425 | 1.725084  |
| 38 | 6 | 0 | 4.265387  | -1.900110 | 1.969763  |
| 39 | 6 | 0 | 3.231053  | 2.447464  | 1.238061  |
| 40 | 8 | 0 | 2.934266  | 3.566161  | 0.902781  |
| 41 | 8 | 0 | 4.019905  | 2.171204  | 2.289780  |
| 42 | 6 | 0 | 4.519177  | 3.308750  | 3.020202  |
| 43 | 1 | 0 | 3.149298  | -1.384728 | -2.350825 |
| 44 | 1 | 0 | -0.378510 | -3.034061 | 0.732723  |
| 45 | 1 | 0 | -0.342391 | 0.088236  | 1.032529  |
| 46 | 1 | 0 | 1.249194  | 0.787716  | -2.594036 |
| 47 | 1 | 0 | -0.890784 | 0.717770  | -1.878853 |
| 48 | 1 | 0 | -2.365345 | -0.072059 | 2.054853  |
| 49 | 1 | 0 | -4.393937 | -2.166923 | -1.925708 |
| 50 | 1 | 0 | -2.050559 | -1.454996 | -1.981820 |
| 51 | 1 | 0 | 2.152616  | 2.489706  | -1.034333 |
| 52 | 1 | 0 | 3.278155  | 1.242376  | -1.494327 |
| 53 | 1 | 0 | 0.230717  | 2.596459  | 0.246474  |
| 54 | 1 | 0 | 5.091083  | -4.407281 | -2.528444 |
| 55 | 1 | 0 | 4.051033  | -3.259246 | -3.408246 |
| 56 | 1 | 0 | 4.984905  | -2.710779 | -1.985214 |
| 57 | 1 | 0 | 0.820581  | -6.429880 | 1.035017  |
| 58 | 1 | 0 | 0.512198  | -4.873451 | 1.846394  |
| 59 | 1 | 0 | -0.454172 | -5.345817 | 0.420487  |
| 60 | 1 | 0 | -7.704078 | -2.699250 | -0.569155 |
| 61 | 1 | 0 | -6.694993 | -1.835896 | -1.757053 |
| 62 | 1 | 0 | -6.198980 | -3.446112 | -1.161803 |
| 63 | 1 | 0 | -5.248924 | -0.122675 | 4.192830  |
| 64 | 1 | 0 | -3.613400 | -0.769686 | 3.909314  |
| 65 | 1 | 0 | -4.060439 | 0.838260  | 3.272198  |
| 66 | 1 | 0 | -0.441386 | 6.552471  | -1.624013 |
| 67 | 1 | 0 | 0.653513  | 5.589117  | -2.663208 |
| 68 | 1 | 0 | -1.102876 | 5.526291  | -2.936927 |
| 69 | 1 | 0 | -4.789613 | 2.824176  | -1.200230 |
| 70 | 1 | 0 | -4.464594 | 1.850074  | 0.264410  |
| 71 | 1 | 0 | -4.238513 | 3.618430  | 0.309912  |
| 72 | 1 | 0 | 1.825489  | 0.892562  | 1.140265  |
| 73 | 1 | 0 | 3.893288  | -2.375502 | 2.874410  |
| 74 | 1 | 0 | 5.285781  | -1.542559 | 2.110233  |
| 75 | 1 | 0 | 4.232803  | -2.600796 | 1.134387  |
| 76 | 1 | 0 | 5.139828  | 2.894162  | 3.810854  |
| 77 | 1 | 0 | 3.691901  | 3.882954  | 3.439356  |
| 78 | 1 | 0 | 5.107110  | 3.951768  | 2.364414  |

---



1,2-cis-2,3-cis-2c

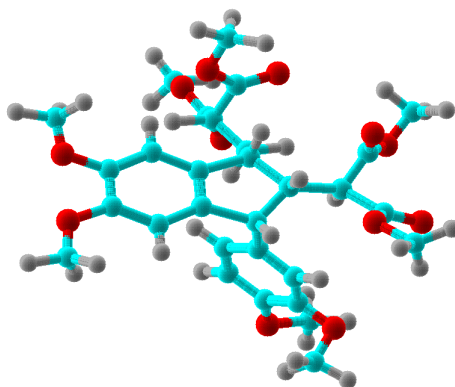

E = -2068.0760338 (rel E = 16.0 kJ/mol)

Standard orientation:

| Center Number | Atomic Number | Atomic Type | Coordinates (Angstroms) |           |           |
|---------------|---------------|-------------|-------------------------|-----------|-----------|
|               |               |             | X                       | Y         | Z         |
| 1             | 6             | 0           | -2.399687               | 2.092868  | -0.656639 |
| 2             | 6             | 0           | -2.289578               | 3.478984  | -0.610318 |
| 3             | 6             | 0           | -1.008672               | 4.090257  | -0.679211 |
| 4             | 6             | 0           | 0.126257                | 3.298577  | -0.814903 |
| 5             | 6             | 0           | 0.000493                | 1.906145  | -0.868892 |
| 6             | 6             | 0           | -1.244974               | 1.305787  | -0.771378 |
| 7             | 6             | 0           | 1.110258                | 0.893952  | -1.076605 |
| 8             | 6             | 0           | -1.137970               | -0.206966 | -0.824377 |
| 9             | 6             | 0           | 0.277003                | -0.385027 | -1.474483 |
| 10            | 6             | 0           | 2.087629                | 0.767297  | 0.089136  |
| 11            | 6             | 0           | 3.430054                | 0.469072  | -0.171721 |
| 12            | 6             | 0           | 1.712375                | 0.966476  | 1.421691  |
| 13            | 6             | 0           | 2.633191                | 0.811150  | 2.454485  |
| 14            | 6             | 0           | 4.364251                | 0.329578  | 0.850768  |
| 15            | 6             | 0           | 3.957504                | 0.476819  | 2.186296  |
| 16            | 6             | 0           | -1.316244               | -0.885975 | 0.555355  |
| 17            | 6             | 0           | -2.750088               | -0.813229 | 1.105720  |
| 18            | 6             | 0           | -3.712711               | -1.588667 | 0.214493  |
| 19            | 8             | 0           | -3.604492               | -2.760926 | -0.046965 |
| 20            | 8             | 0           | -4.687092               | -0.800953 | -0.279035 |
| 21            | 6             | 0           | -5.634539               | -1.453921 | -1.148823 |
| 22            | 6             | 0           | -2.818632               | -1.357592 | 2.532794  |
| 23            | 8             | 0           | -1.873806               | -1.582029 | 3.241554  |
| 24            | 8             | 0           | -4.100759               | -1.519462 | 2.916406  |
| 25            | 6             | 0           | -4.298414               | -2.017555 | 4.253774  |
| 26            | 6             | 0           | 0.938598                | -1.756982 | -1.265842 |
| 27            | 6             | 0           | 2.234820                | -2.000908 | -2.047337 |
| 28            | 6             | 0           | -0.020902               | -2.865867 | -1.725389 |
| 29            | 8             | 0           | -0.632267               | -2.844415 | -2.764621 |
| 30            | 8             | 0           | 2.386404                | -1.159473 | -3.088792 |
| 31            | 8             | 0           | 3.012461                | -2.880712 | -1.783902 |
| 32            | 6             | 0           | 3.546770                | -1.397212 | -3.909642 |
| 33            | 8             | 0           | -0.089963               | -3.856393 | -0.826207 |
| 34            | 6             | 0           | -1.000243               | -4.933857 | -1.141068 |
| 35            | 8             | 0           | -3.339479               | 4.340319  | -0.510170 |
| 36            | 8             | 0           | -1.009814               | 5.450428  | -0.620843 |
| 37            | 8             | 0           | 5.663118                | 0.014488  | 0.521145  |
| 38            | 8             | 0           | 4.847913                | 0.350121  | 3.228510  |

|    |   |   |           |           |           |
|----|---|---|-----------|-----------|-----------|
| 39 | 6 | 0 | -4.648435 | 3.796445  | -0.468063 |
| 40 | 6 | 0 | 0.237816  | 6.122480  | -0.681442 |
| 41 | 6 | 0 | 6.625196  | 1.043050  | 0.791022  |
| 42 | 6 | 0 | 5.302034  | -0.990405 | 3.467803  |
| 43 | 1 | 0 | -3.374579 | 1.624643  | -0.630424 |
| 44 | 1 | 0 | 1.105524  | 3.753752  | -0.886196 |
| 45 | 1 | 0 | 1.707154  | 1.171671  | -1.949033 |
| 46 | 1 | 0 | -1.878314 | -0.629500 | -1.511576 |
| 47 | 1 | 0 | 0.108370  | -0.290894 | -2.548503 |
| 48 | 1 | 0 | 3.782976  | 0.348802  | -1.189508 |
| 49 | 1 | 0 | 0.696735  | 1.256427  | 1.659029  |
| 50 | 1 | 0 | 2.340820  | 0.949788  | 3.488917  |
| 51 | 1 | 0 | -0.649420 | -0.441738 | 1.293667  |
| 52 | 1 | 0 | -1.052040 | -1.942855 | 0.496514  |
| 53 | 1 | 0 | -3.093846 | 0.222447  | 1.161939  |
| 54 | 1 | 0 | -6.331007 | -0.676868 | -1.454719 |
| 55 | 1 | 0 | -5.125118 | -1.879296 | -2.014078 |
| 56 | 1 | 0 | -6.154628 | -2.247462 | -0.611064 |
| 57 | 1 | 0 | -5.376103 | -2.089967 | 4.379707  |
| 58 | 1 | 0 | -3.830503 | -2.996247 | 4.366813  |
| 59 | 1 | 0 | -3.870384 | -1.328914 | 4.983528  |
| 60 | 1 | 0 | 1.192821  | -1.944023 | -0.223005 |
| 61 | 1 | 0 | 3.520478  | -0.628398 | -4.678396 |
| 62 | 1 | 0 | 4.457290  | -1.321906 | -3.313588 |
| 63 | 1 | 0 | 3.494652  | -2.390595 | -4.356828 |
| 64 | 1 | 0 | -0.828336 | -5.684609 | -0.373509 |
| 65 | 1 | 0 | -0.783671 | -5.333837 | -2.131630 |
| 66 | 1 | 0 | -2.026539 | -4.568792 | -1.098623 |
| 67 | 1 | 0 | -5.320878 | 4.649631  | -0.393458 |
| 68 | 1 | 0 | -4.789936 | 3.146892  | 0.403634  |
| 69 | 1 | 0 | -4.879571 | 3.231253  | -1.378536 |
| 70 | 1 | 0 | 0.006128  | 7.183590  | -0.604320 |
| 71 | 1 | 0 | 0.752910  | 5.933215  | -1.630551 |
| 72 | 1 | 0 | 0.892782  | 5.833111  | 0.148503  |
| 73 | 1 | 0 | 7.589889  | 0.645645  | 0.476275  |
| 74 | 1 | 0 | 6.654196  | 1.291243  | 1.854464  |
| 75 | 1 | 0 | 6.397231  | 1.943423  | 0.209757  |
| 76 | 1 | 0 | 5.992831  | -0.931281 | 4.308629  |
| 77 | 1 | 0 | 5.814985  | -1.396508 | 2.592585  |
| 78 | 1 | 0 | 4.460356  | -1.638443 | 3.733716  |

---

## References

- [S1] (a) E. J. Corey and M. Chaykovsky, *J. Am. Chem. Soc.*, 1965, **86**, 1353; (b) W. Fraser, C. J. Suckling and H. C. S. Wood, *J. Chem. Soc., Perkin Trans. 1*, 1990, 3137.
- [S2] Yu. A. Volkova, E. M. Budynina, A. E. Kaplun, O. A. Ivanova, A. O. Chagarovskiy, D. A. Skvortsov, V. B. Rybakov, I. V. Trushkov and M. Ya. Melnikov, *Chem. Eur. J.*, 2013, **19**, 6586.
- [S3] O. A. Ivanova, E. M. Budynina, A. O. Chagarovskiy, A. E. Kaplun, I. V. Trushkov and M. Ya. Melnikov, *Adv. Synth. Catal.*, 2011, **353**, 1125-1134.
- [S4] M. J. Frisch, G. W. Trucks, H. B. Schlegel, G. E. Scuseria, M. A. Robb, J. R. Cheeseman, V. G. Zakrzewski, J. A. Montgomery, R. E. Stratmann, J. C. Burant, S. Dapprich, J. M. Millam, A. D. Daniels, K. N. Kudin, M. C. Strain, O. Farkas, J. Tomasi, V. Barone, M. Cossi, R. Cammi, B. Mennucci, C. Pomelli, C. Adamo, S. Clifford, J. Ochterski, G. A. Petersson, P. Y. Ayala, Q. Cui, K. Morokuma, P. Salvador, J. J. Dannenberg, D. K. Malick, A. D. Rabuck, K. Raghavachari, J. B. Foresman, J. Cioslowski, J. V. Ortiz, A. G. Baboul, B. B. Stefanov, G. Liu, A. Liashenko, P. Piskorz, I. Komaromi, R. Gomperts, R. L. Martin, D. J. Fox, T. Keith, M. A. Al-Laham, C. Y. Peng, A. Nanayakkara, M. Challacombe, P. M. W. Gill, B. Johnson, W. Chen, M. W. Wong, J. L. Andres, C. Gonzalez, M. Head-Gordon, E. S. Replogle and J. A. Pople, *Gaussian 98, Revision A.11*, Gaussian, Inc., Pittsburgh PA, 2001.
- [S5] L. J. Farrugia, *J. Appl. Cryst.*, 1997, **30**, 565.
- [S6] M. Ferrari, M.C. Fornasiero and A.M. Isetta, *J. Immunol. Methods*, 1990, **131**, 165-172.

### Dimethyl 2-(2,3,4-trimethoxyphenyl)cyclopropane-1,1-dicarboxylate (1d)

$^1\text{H}$  NMR ( $\text{CDCl}_3$ , 600 MHz)

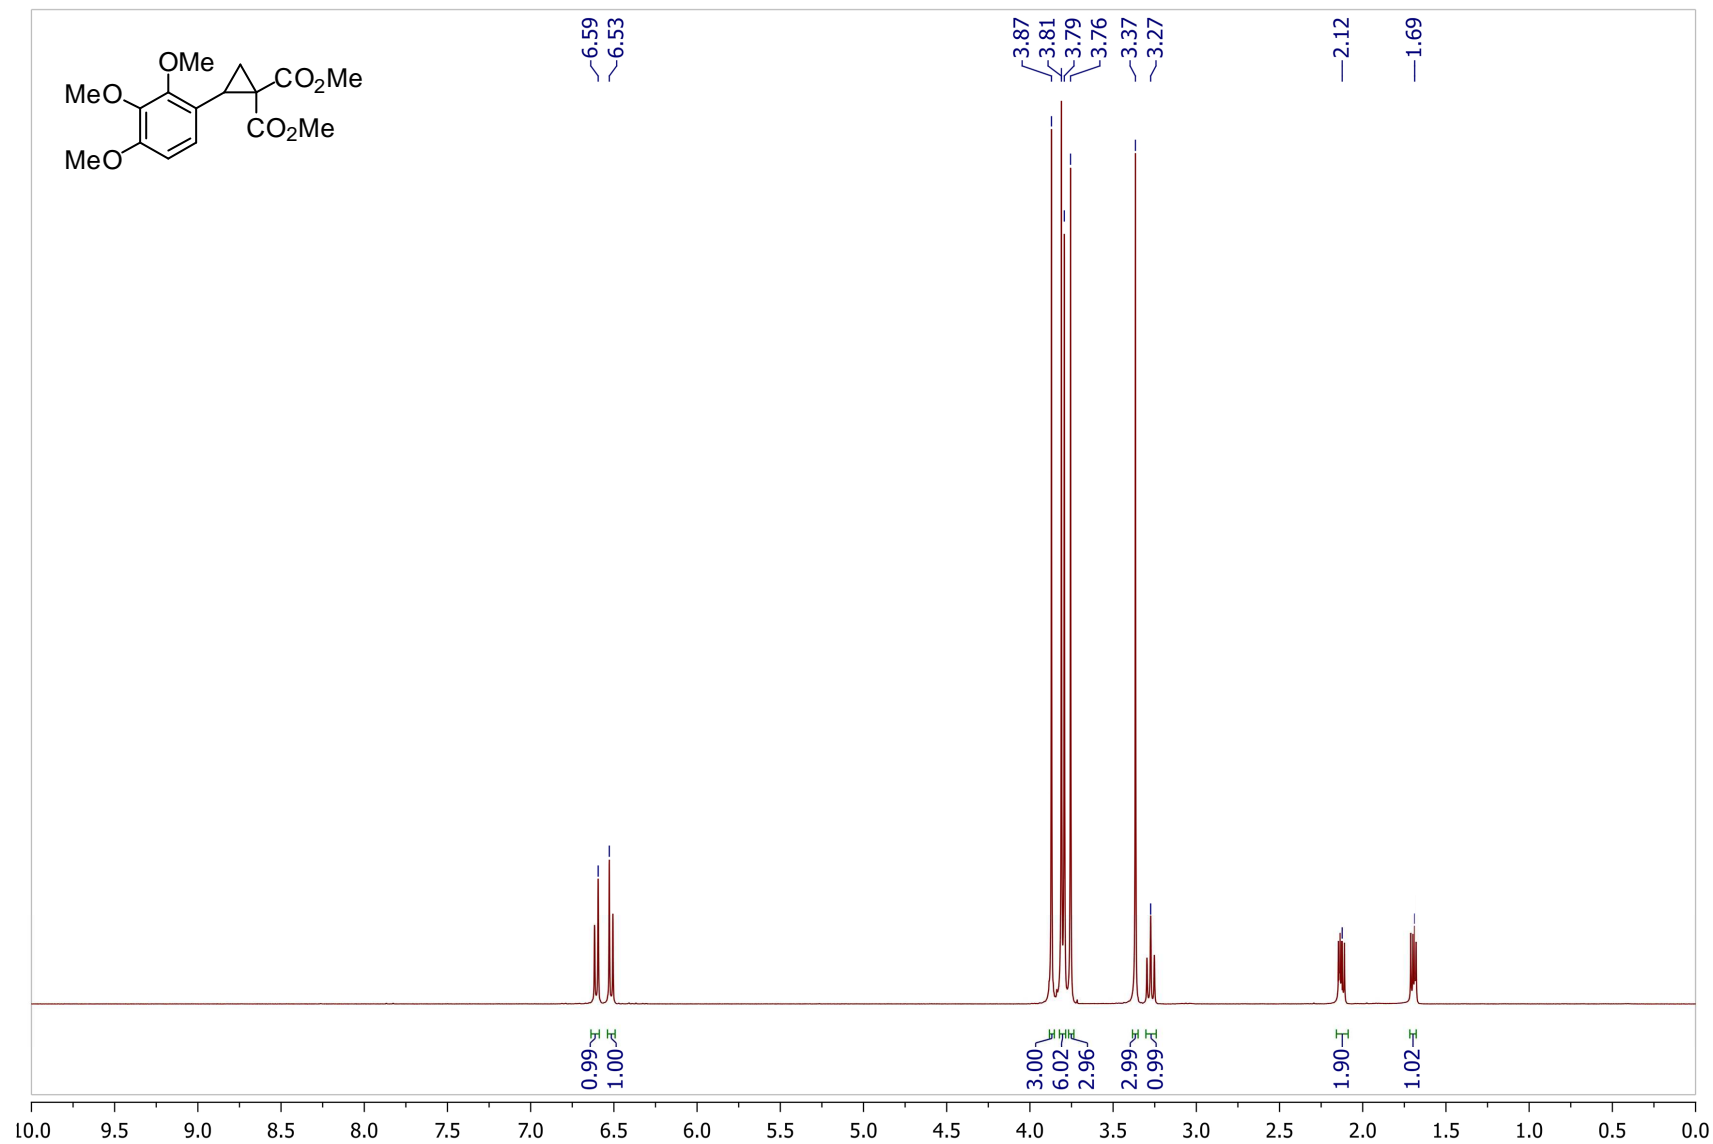

### Dimethyl 2-(2,3,4-trimethoxyphenyl)cyclopropane-1,1-dicarboxylate (1d)

$^{13}\text{C}$  NMR ( $\text{CDCl}_3$ , 150 MHz)

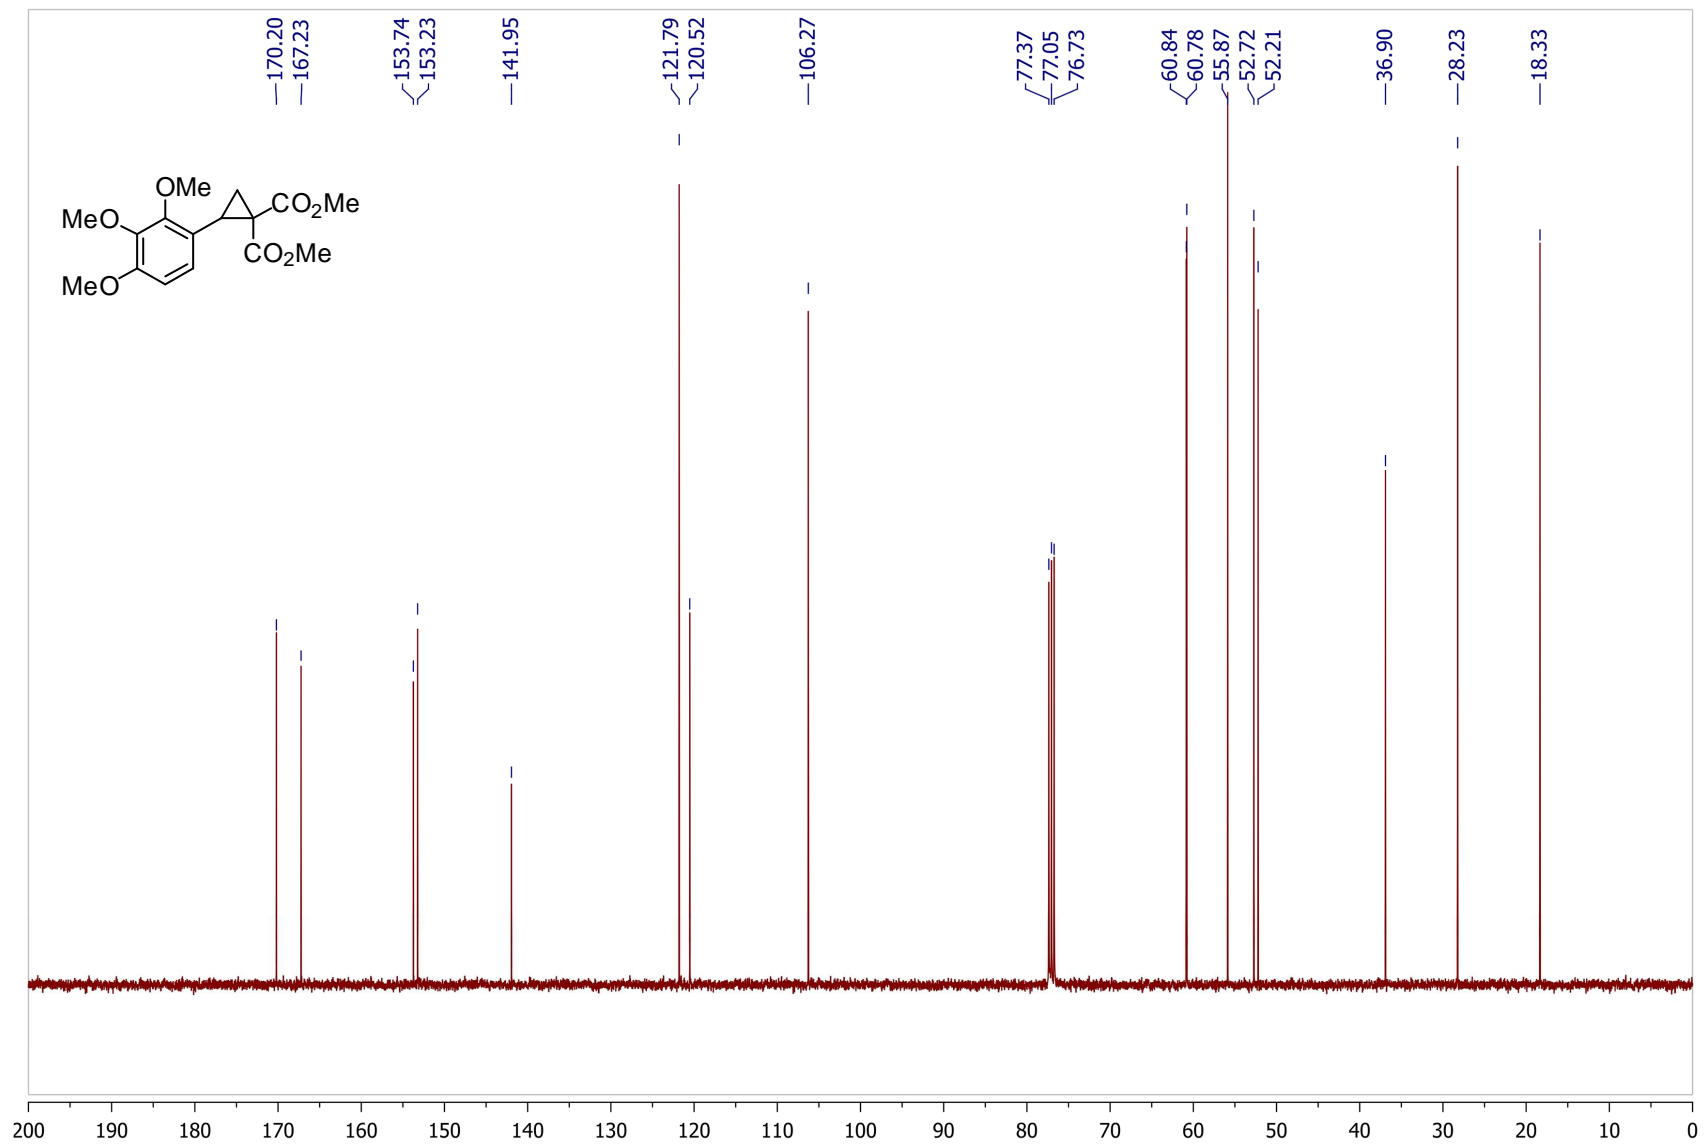

**Dimethyl {[(6*RS*,7*SR*,8*SR*)-8-(2,3-dihydro-1,4-benzodioxin-6-yl)-7-[2-methoxy-1-(methoxycarbonyl)-2-oxoethyl]-2,3,7,8-tetrahydro-6H-indeno[5,6-b][1,4]dioxin-6-yl]-methyl}malonate (2a)**

<sup>1</sup>H NMR (CDCl<sub>3</sub>, 600 MHz)

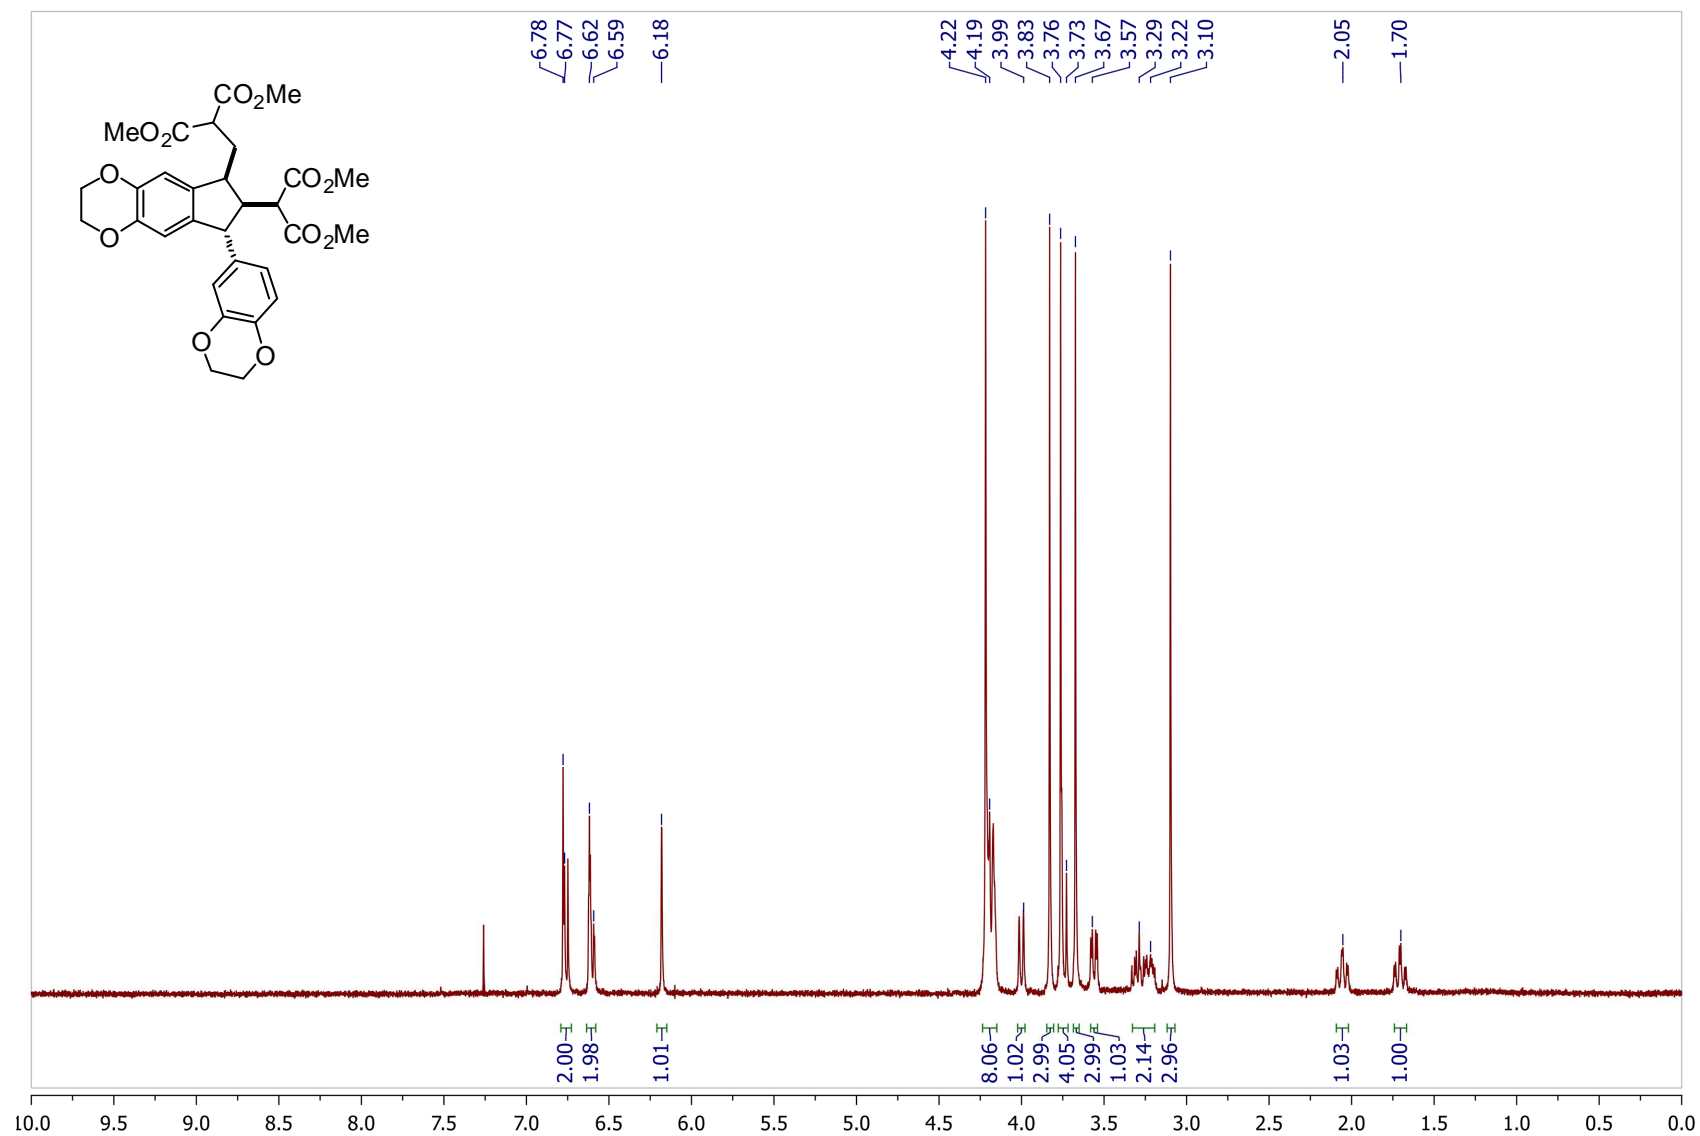

**Dimethyl {[(6*RS*,7*SR*,8*SR*)-8-(2,3-dihydro-1,4-benzodioxin-6-yl)-7-[2-methoxy-1-(methoxycarbonyl)-2-oxoethyl]-2,3,7,8-tetrahydro-6H-indeno[5,6-b][1,4]dioxin-6-yl]-methyl}malonate (2a)**

$^{13}\text{C}$  NMR ( $\text{CDCl}_3$ , 150 MHz)

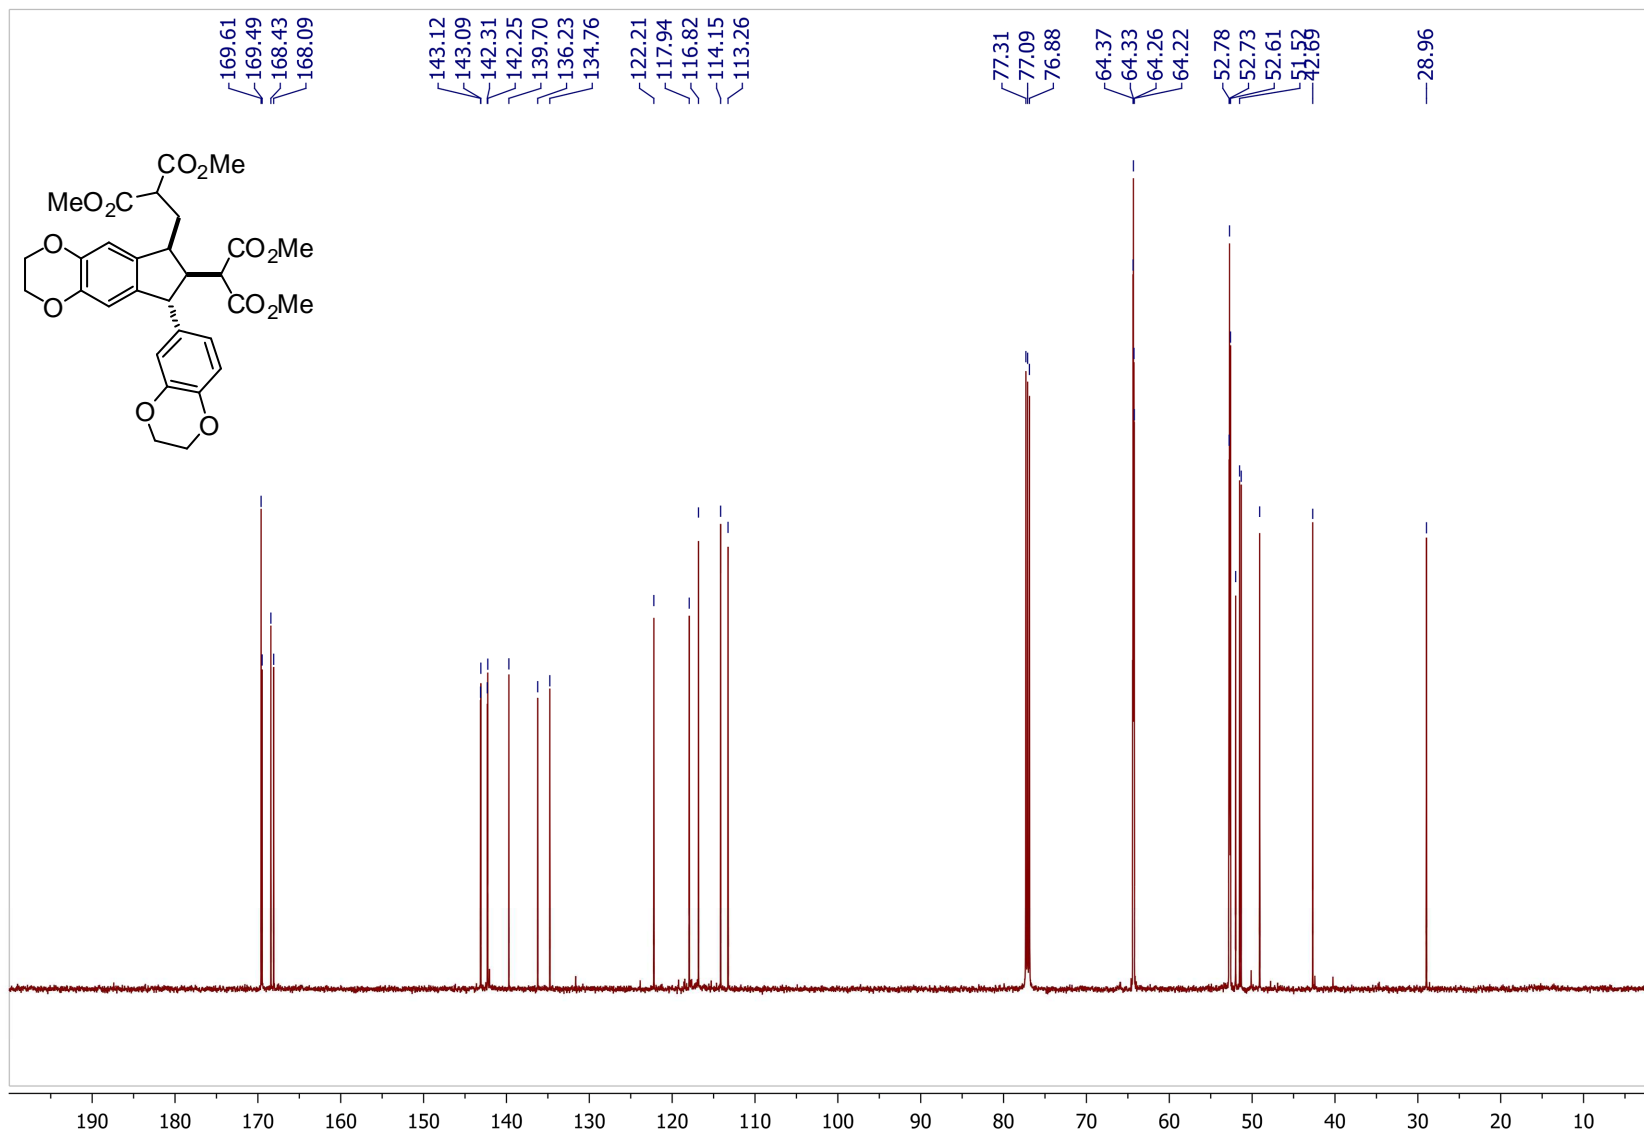

**Dimethyl ((5*RS*,6*SR*,7*SR*)-7-(1,3-benzodioxol-5-yl)-6-[2-methoxy-1-(methoxycarbonyl)-2-oxoethyl]-6,7-dihydro-5*H*-indeno[5,6-*d*][1,3]dioxol-5-yl)methyl)malonate (2b)**

<sup>1</sup>H NMR (CDCl<sub>3</sub>, 600 MHz)

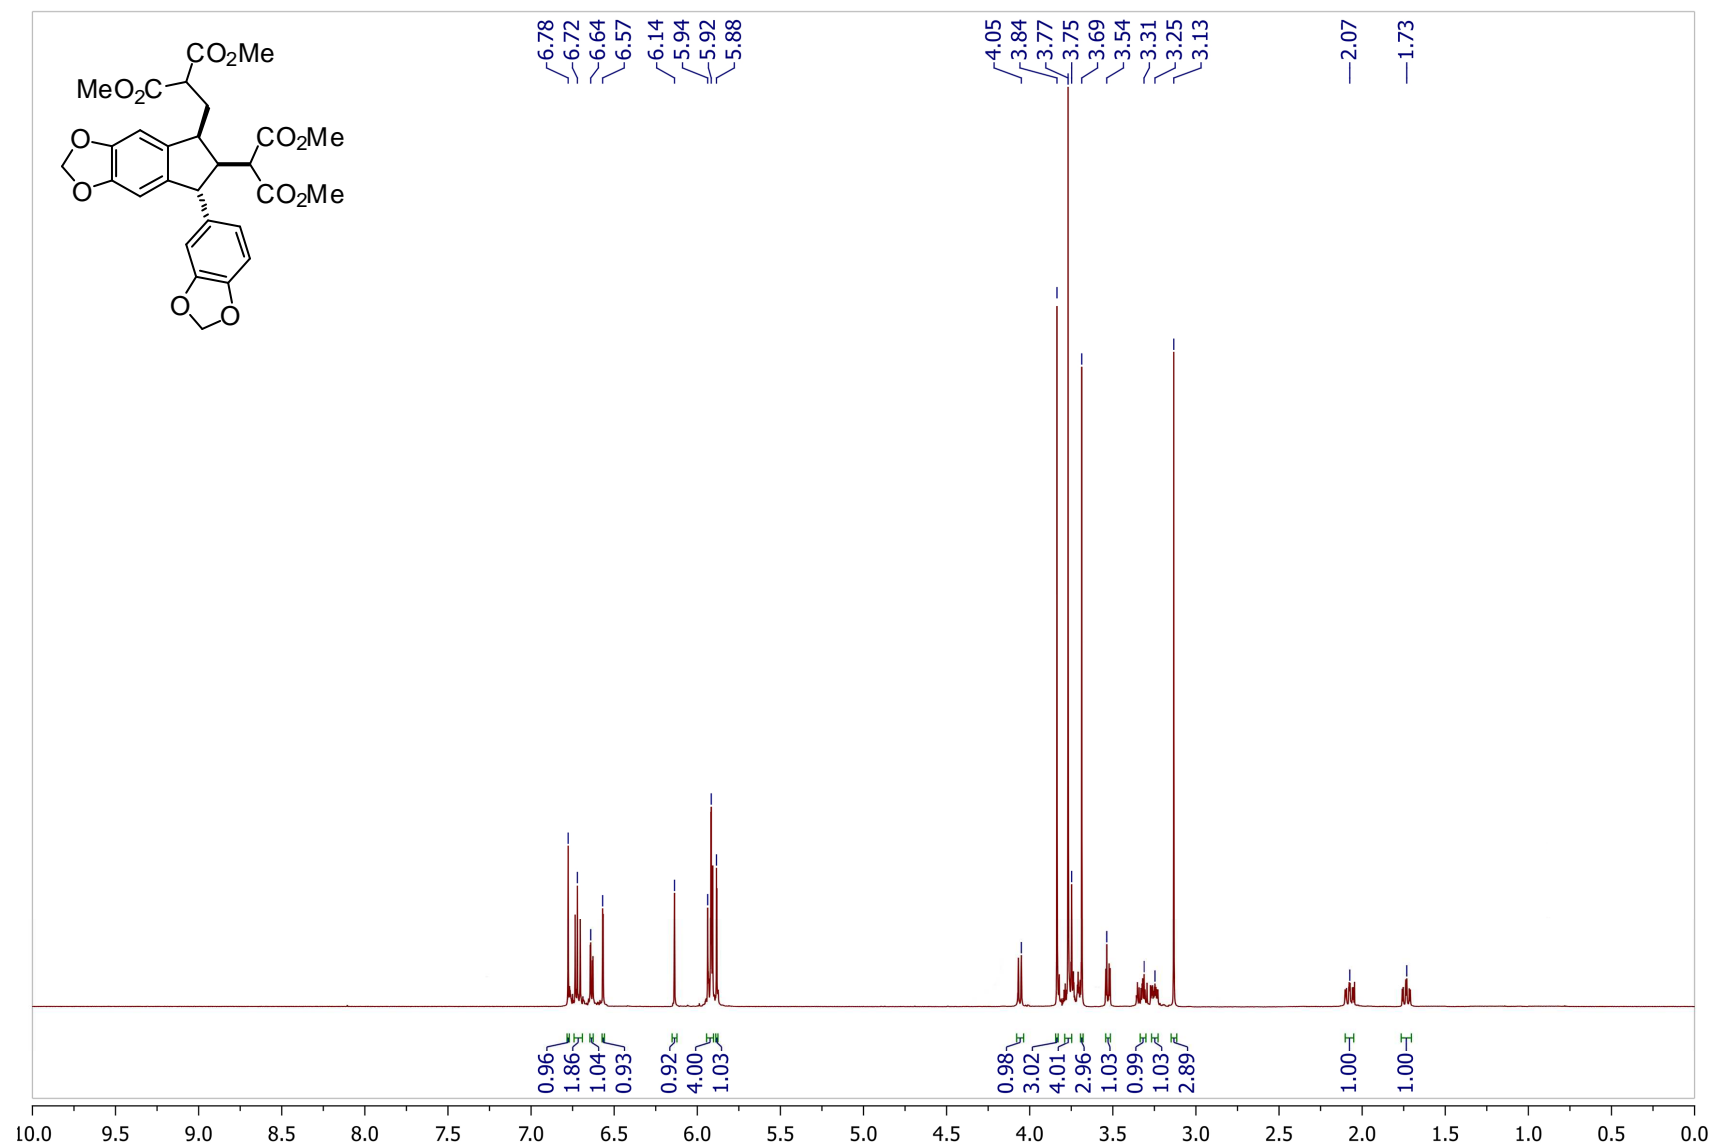



**Dimethyl ((5*RS*,6*SR*,7*SR*)-7-(1,3-benzodioxol-5-yl)-6-[2-methoxy-1-(methoxycarbonyl)-2-oxoethyl]-6,7-dihydro-5*H*-indeno[5,6-*d*][1,3]dioxol-5-yl)methyl)malonate (2b)**

COSY  $^1\text{H}$ - $^1\text{H}$

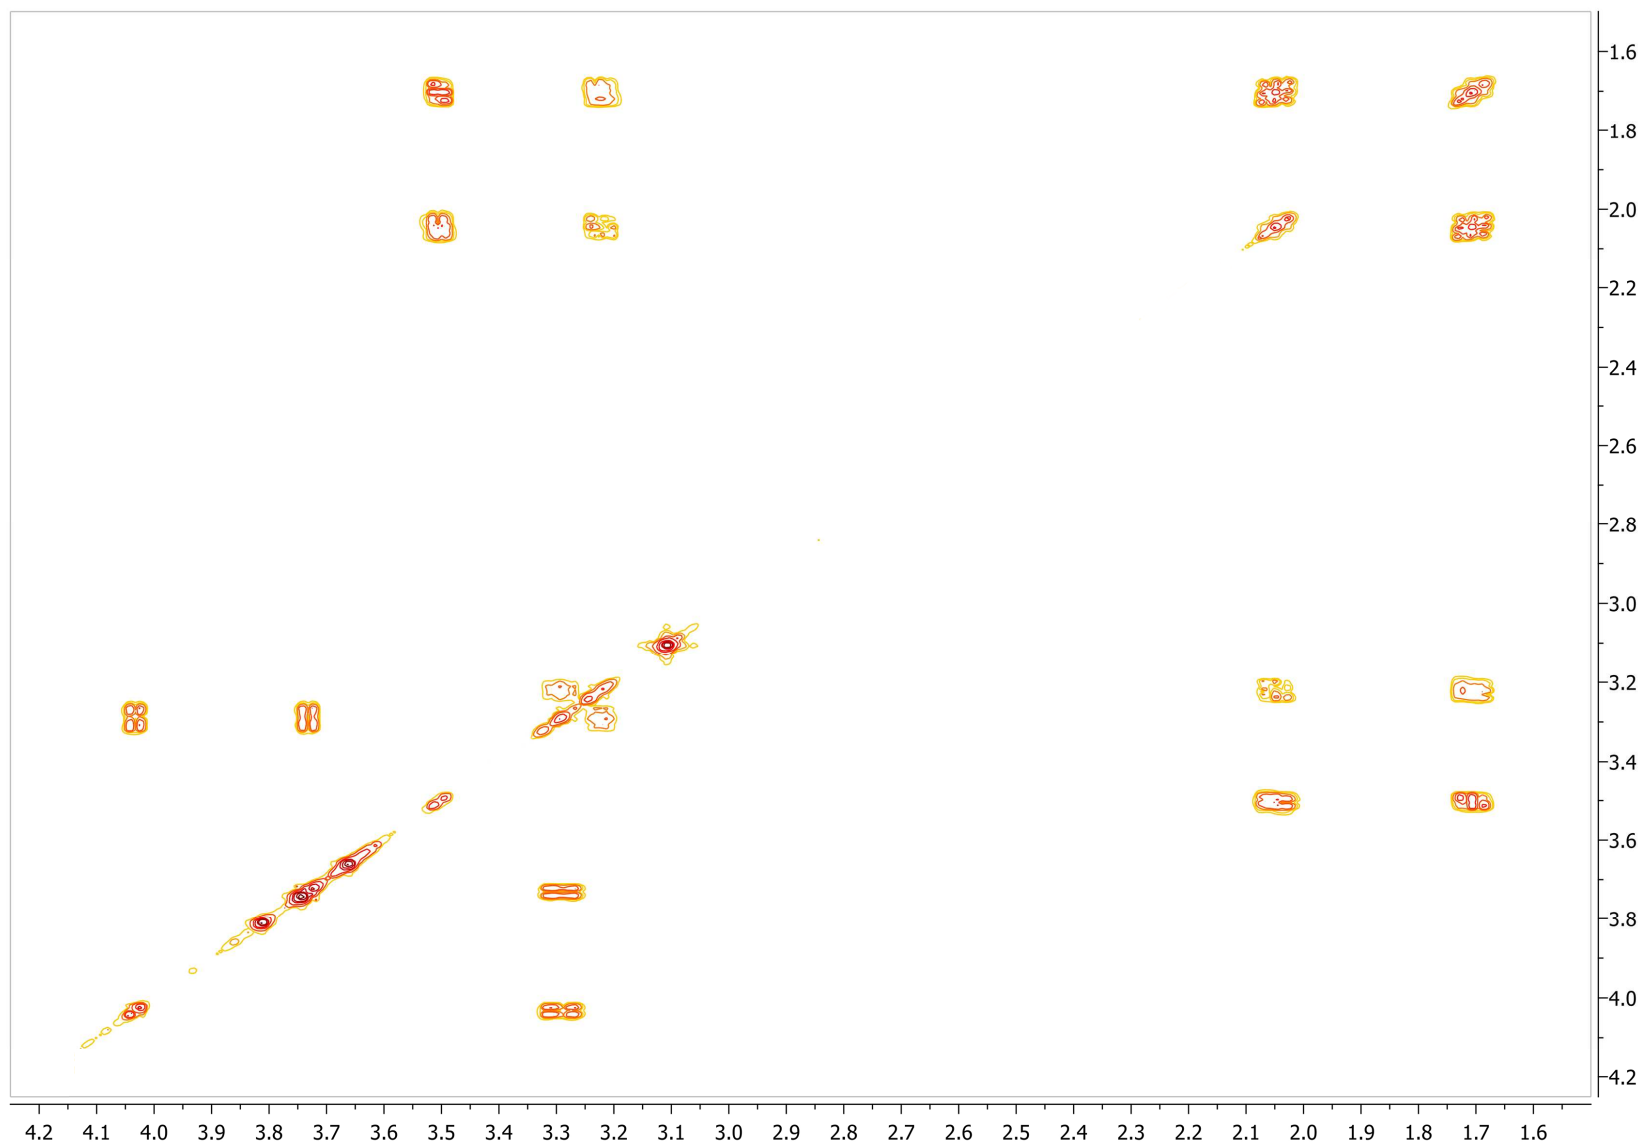

**Dimethyl ((5*RS*,6*SR*,7*SR*)-7-(1,3-benzodioxol-5-yl)-6-[2-methoxy-1-(methoxycarbonyl)-2-oxoethyl]-6,7-dihydro-5*H*-indeno[5,6-*d*][1,3]dioxol-5-yl)methyl)malonate (2b)**

<sup>13</sup>C NMR (CDCl<sub>3</sub>, 150 MHz)

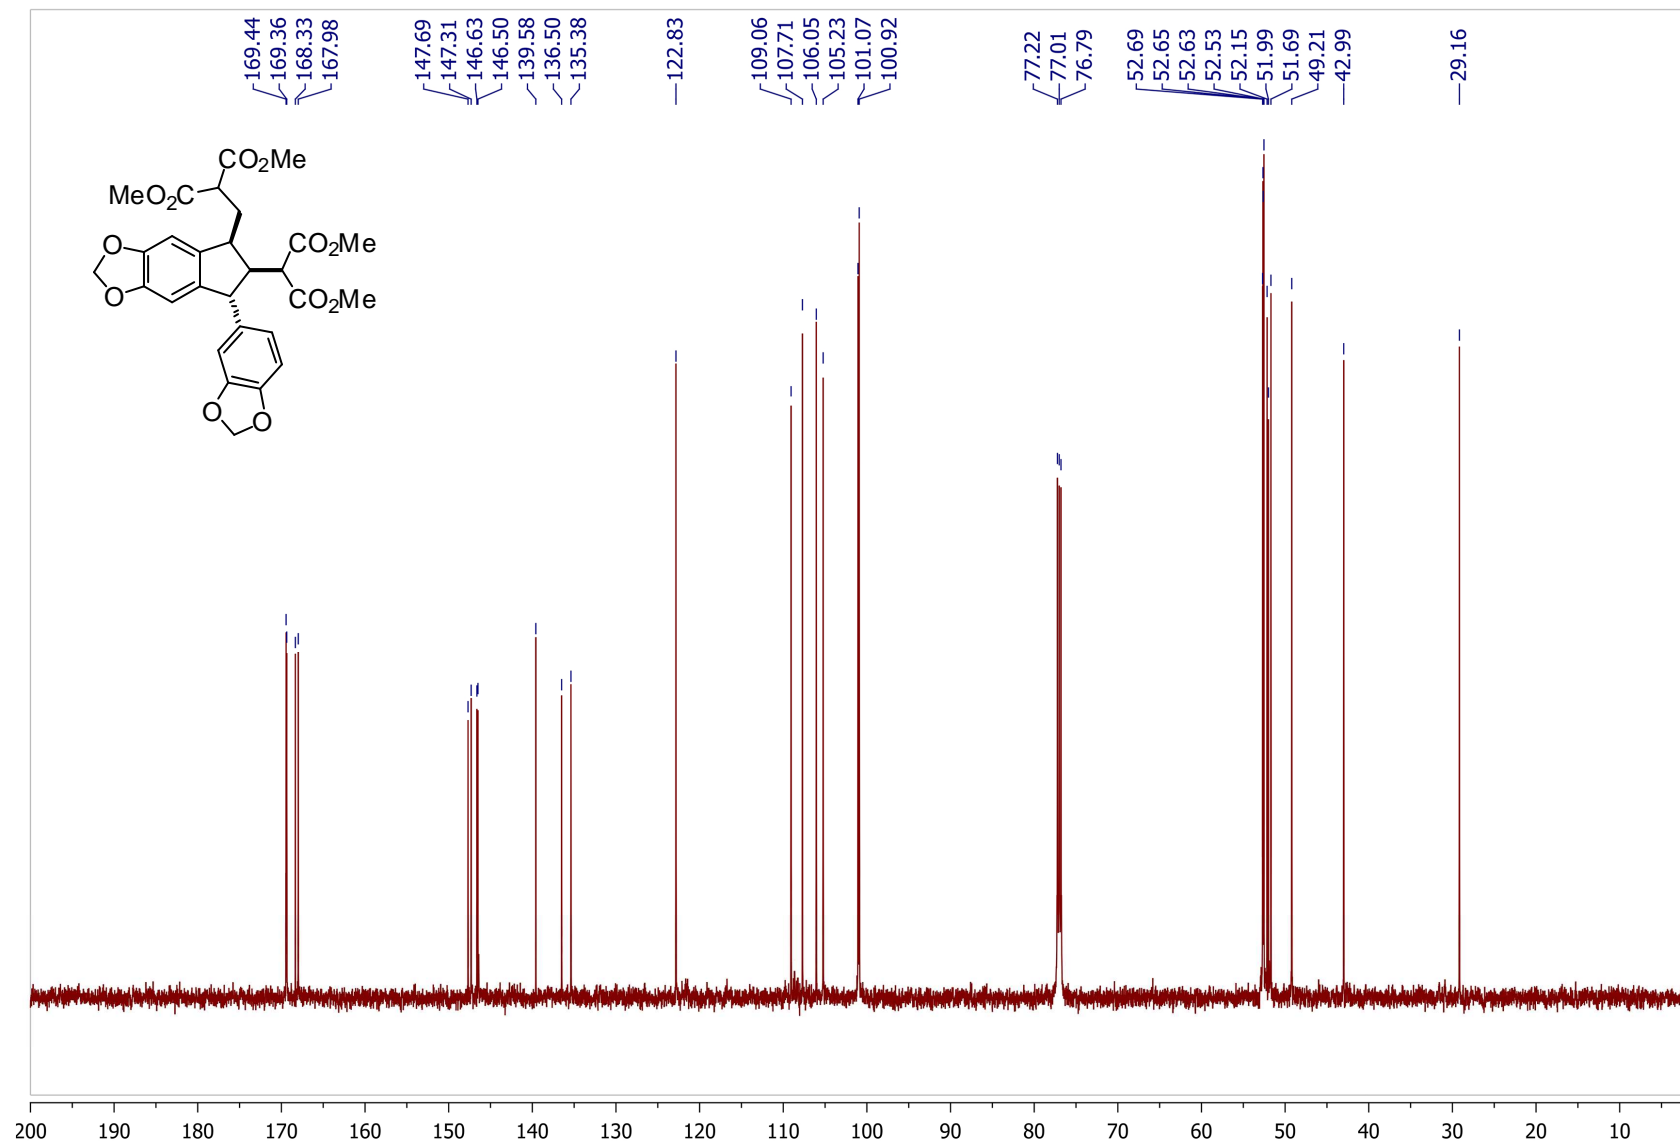

**Dimethyl ({1*RS*,2*SR*,3*SR*}-3-(3,4-dimethoxyphenyl)-5,6-dimethoxy-2-[2-methoxy-1-(methoxycarbonyl)-2-oxoethyl]-2,3-dihydro-1*H*-inden-1-yl)methylmalonate (2c)**

<sup>1</sup>H NMR (CDCl<sub>3</sub>, 600 MHz)

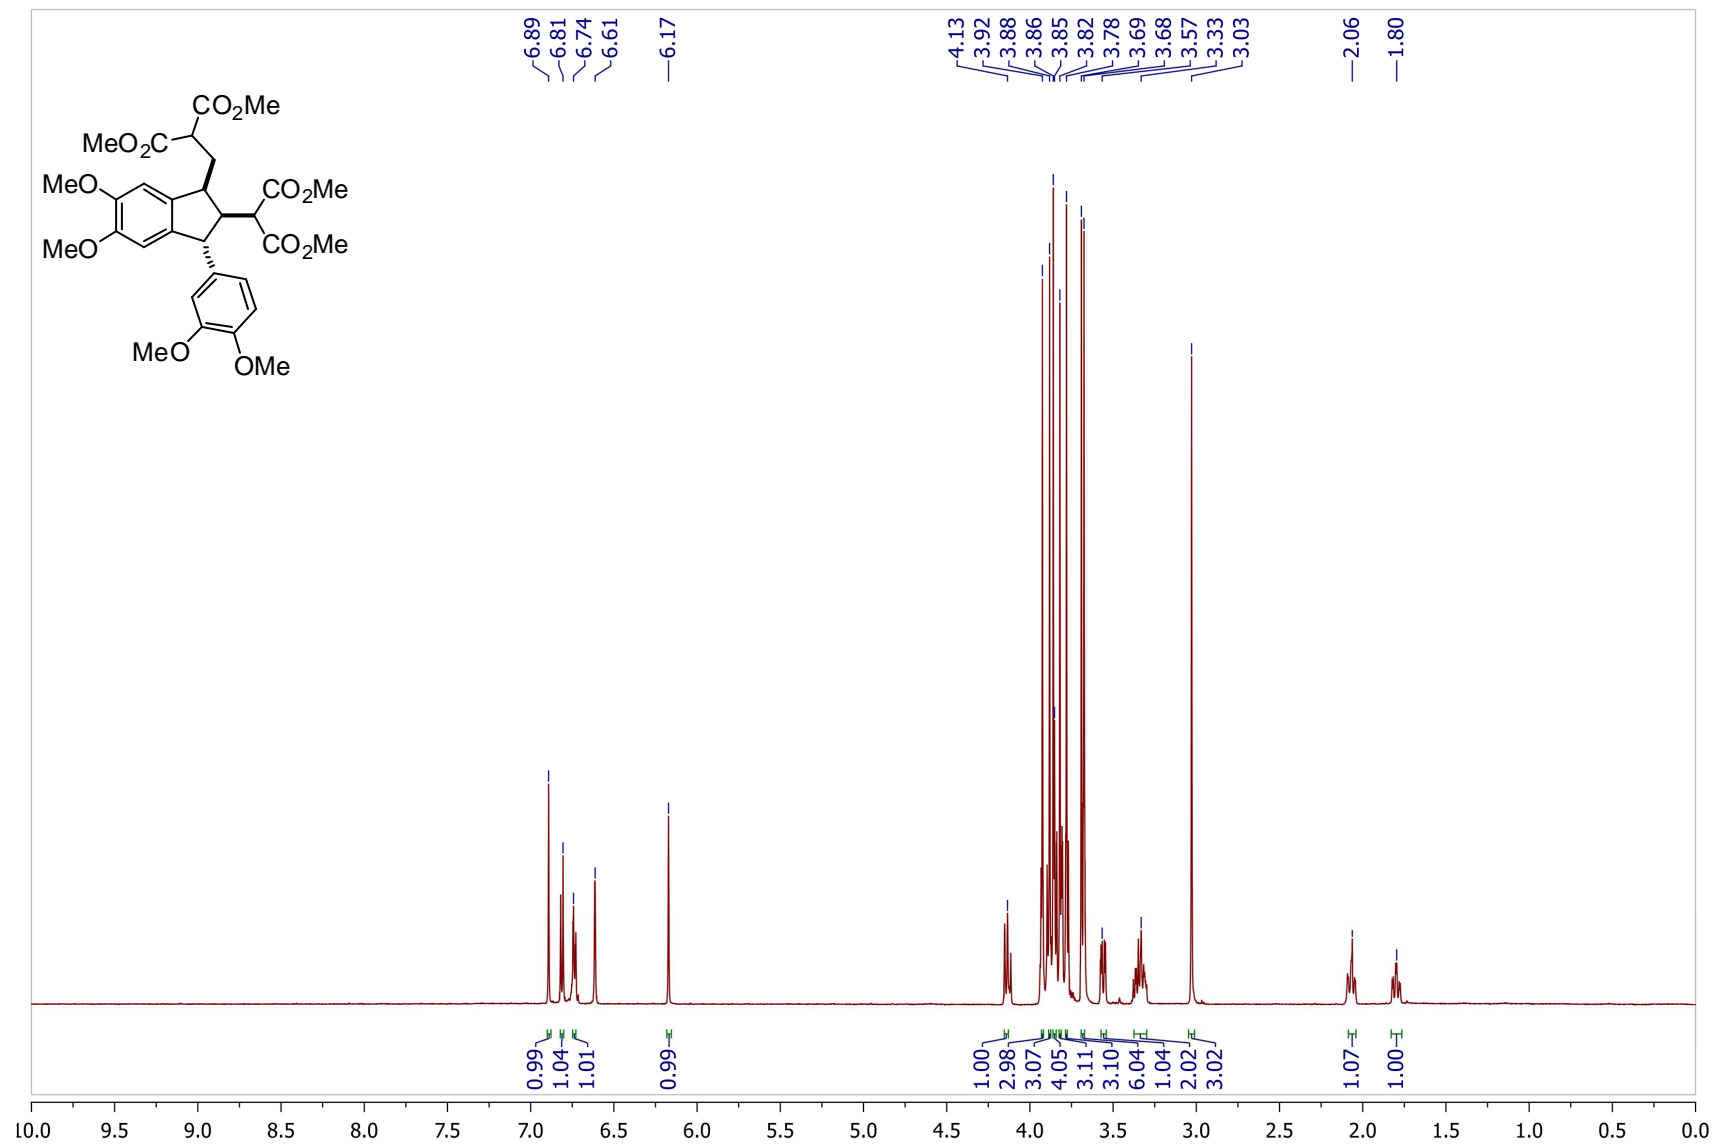

**Dimethyl ({1*RS*,2*SR*,3*SR*}-3-(3,4-dimethoxyphenyl)-5,6-dimethoxy-2-[2-methoxy-1-(methoxycarbonyl)-2-oxoethyl]-2,3-dihydro-1*H*-inden-1-yl)methyl)malonate (2c)**

<sup>13</sup>C NMR (CDCl<sub>3</sub>, 150 MHz)

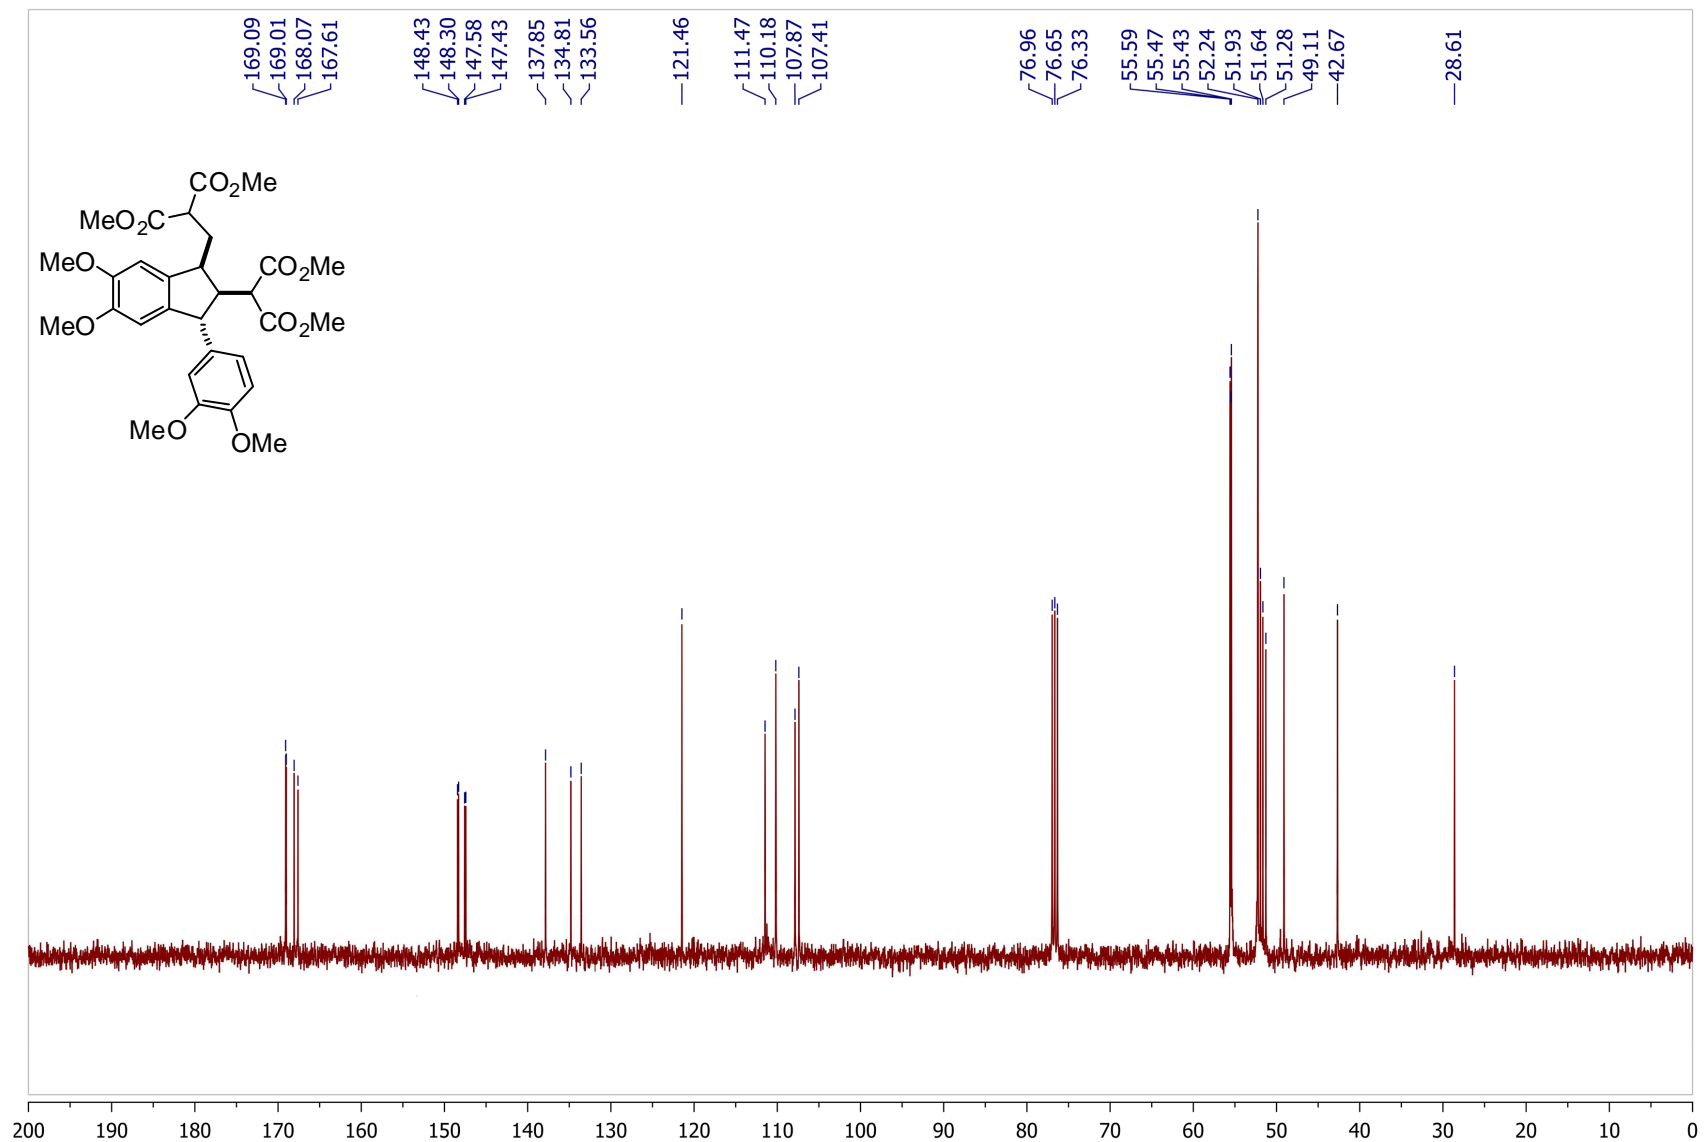

**Dimethyl ((5*RS*,6*SR*,7*SR*)-7-(2,3-dihydro-1,4-benzodioxin-6-yl)-6-[2-methoxy-1-(methoxycarbonyl)-2-oxoethyl]-6,7-dihydro-5*H*-indeno[5,6-*d*][1,3]dioxol-5-yl)methyl)malonate (2d)**

<sup>1</sup>H NMR (CDCl<sub>3</sub>, 600 MHz)

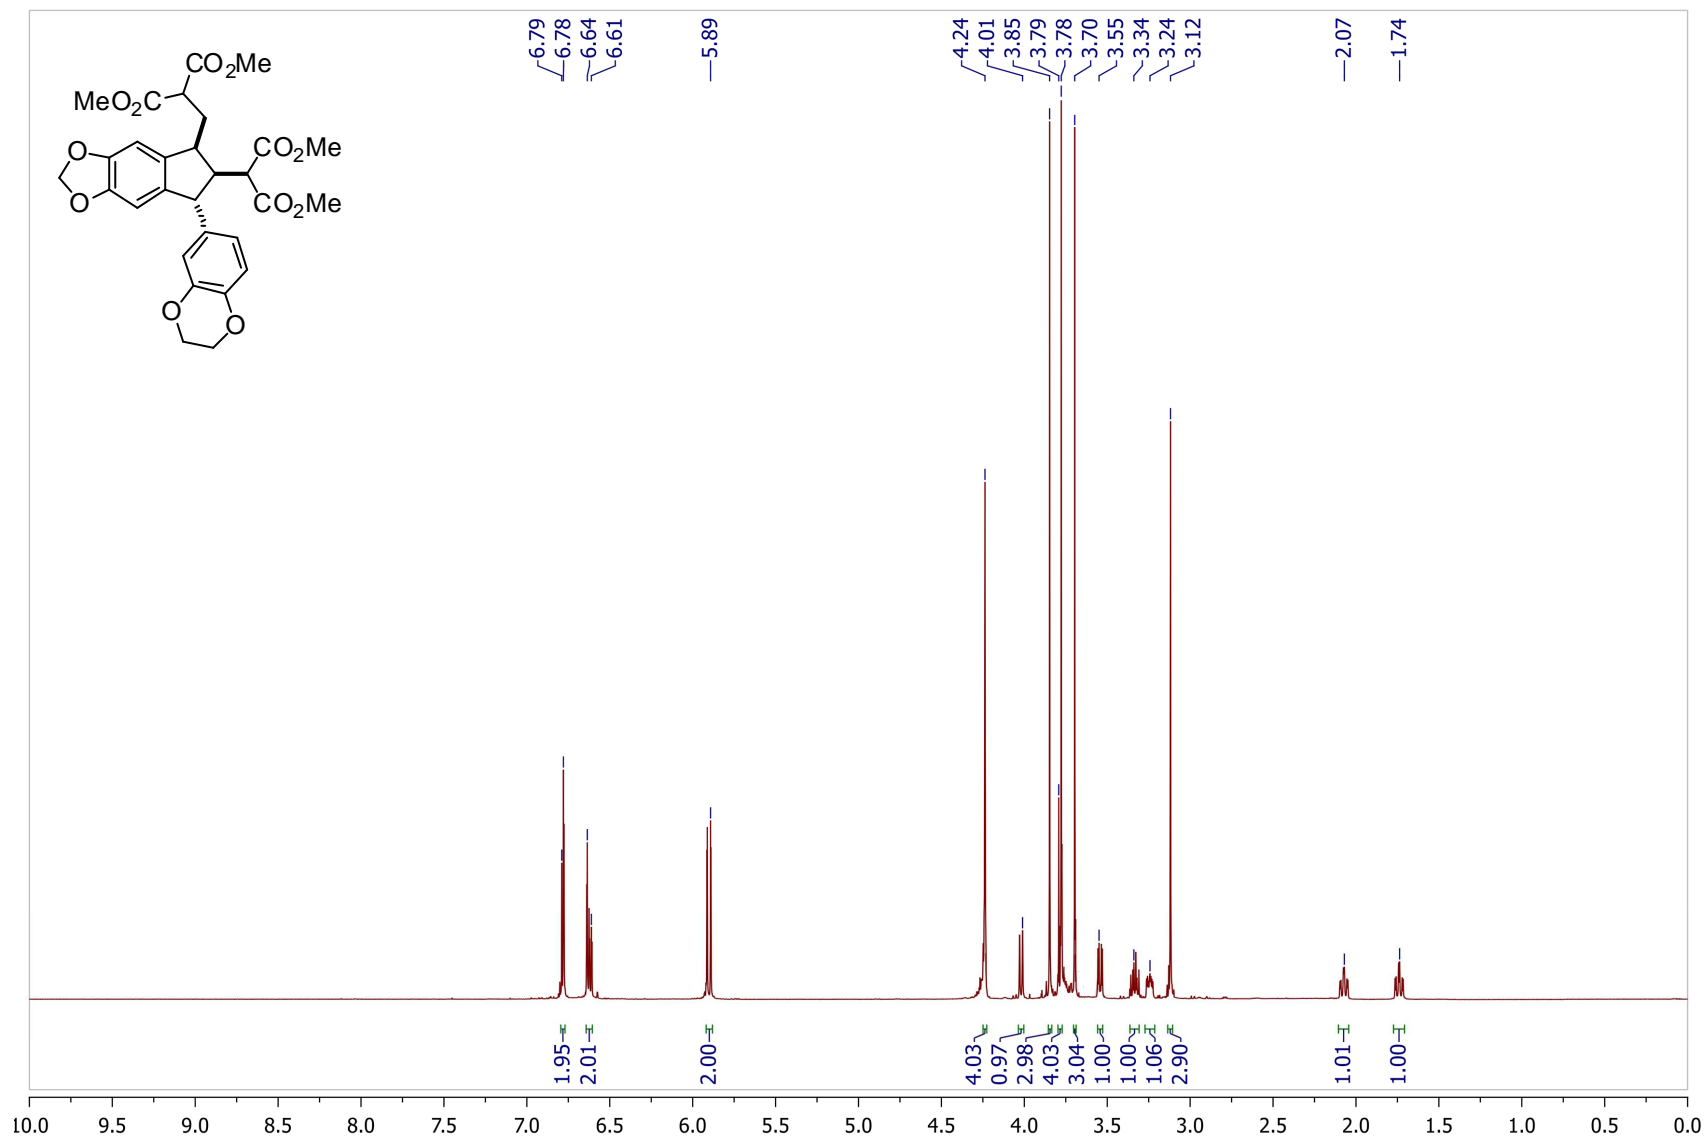

**Dimethyl ((5*RS*,6*SR*,7*SR*)-7-(2,3-dihydro-1,4-benzodioxin-6-yl)-6-[2-methoxy-1-(methoxycarbonyl)-2-oxoethyl]-6,7-dihydro-5*H*-indeno[5,6-*d*][1,3]dioxol-5-yl)methyl)malonate (2d)**

<sup>13</sup>C NMR (CDCl<sub>3</sub>, 150 MHz)

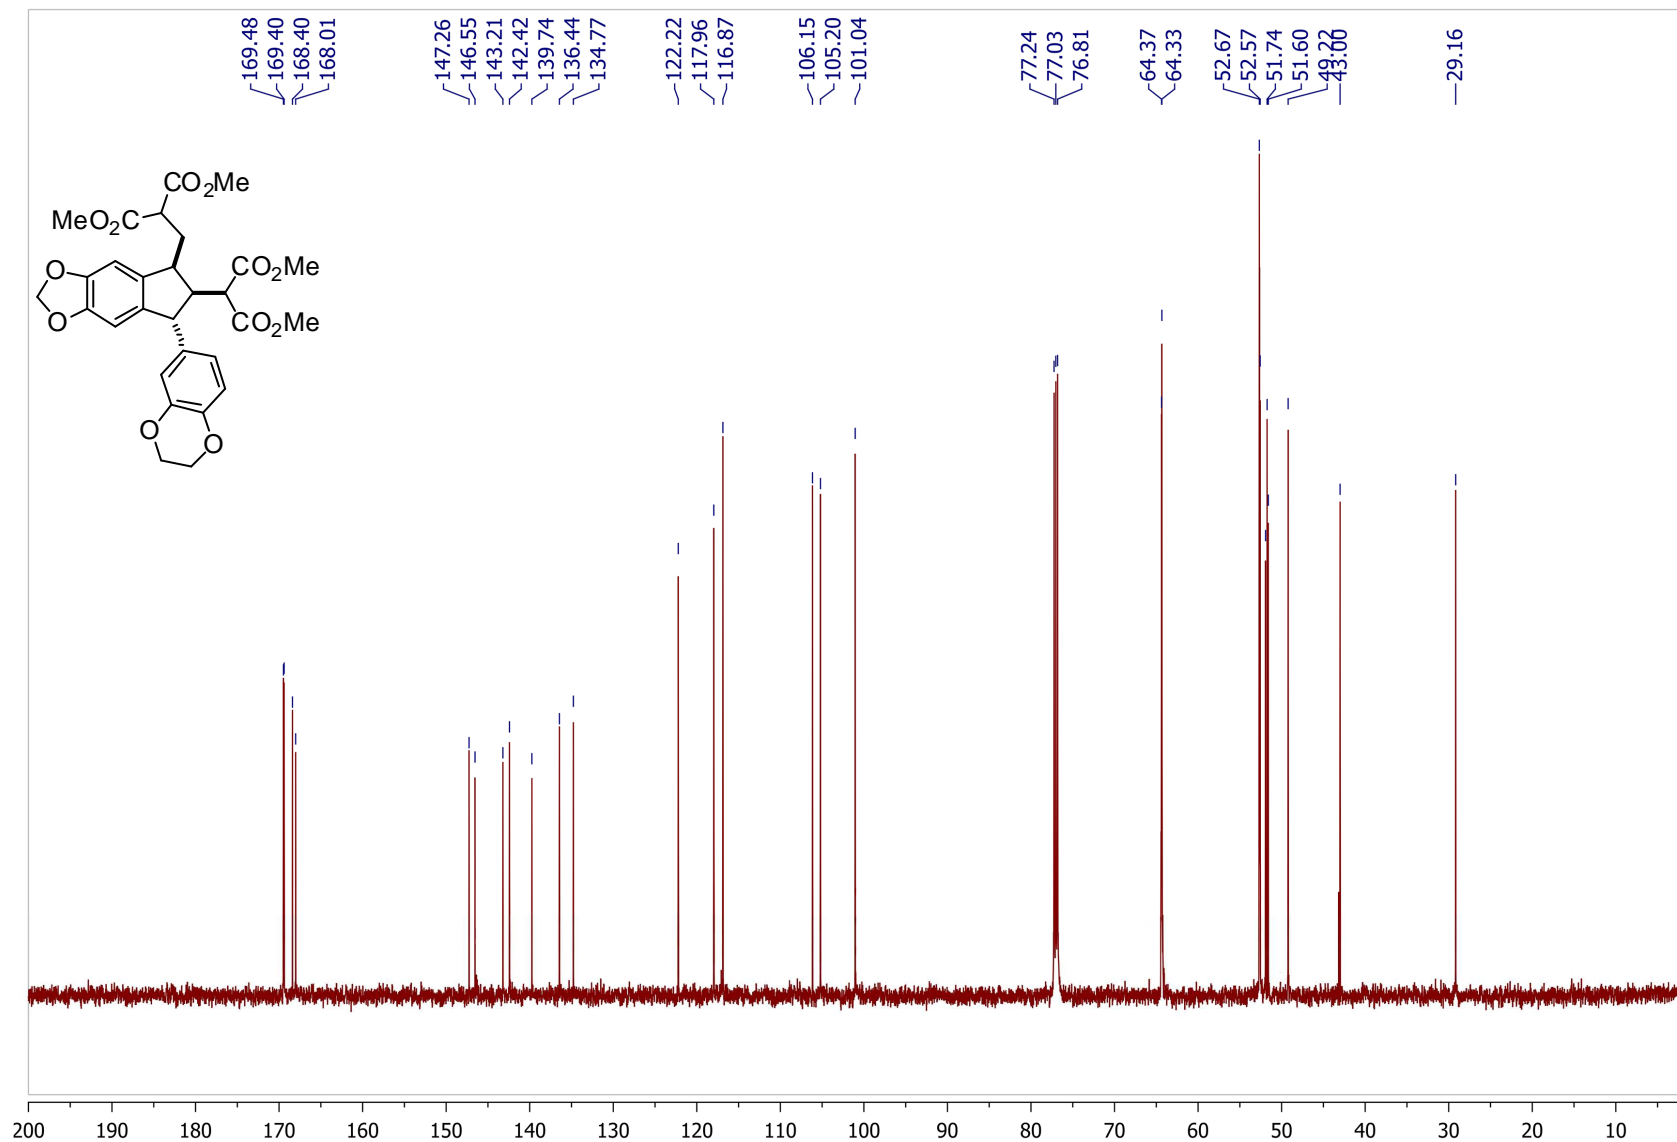

**Dimethyl ((1*RS*,2*SR*,3*SR*)-3-(2,3-dihydro-1,4-benzodioxin-6-yl)-5,6,7-trimethoxy-2-[2-methoxy-1-(methoxycarbonyl)-2-oxoethyl]-2,3-dihydro-1*H*-inden-1-yl)methyl)malonate (2e)**

<sup>1</sup>H NMR (CDCl<sub>3</sub>, 600 MHz)

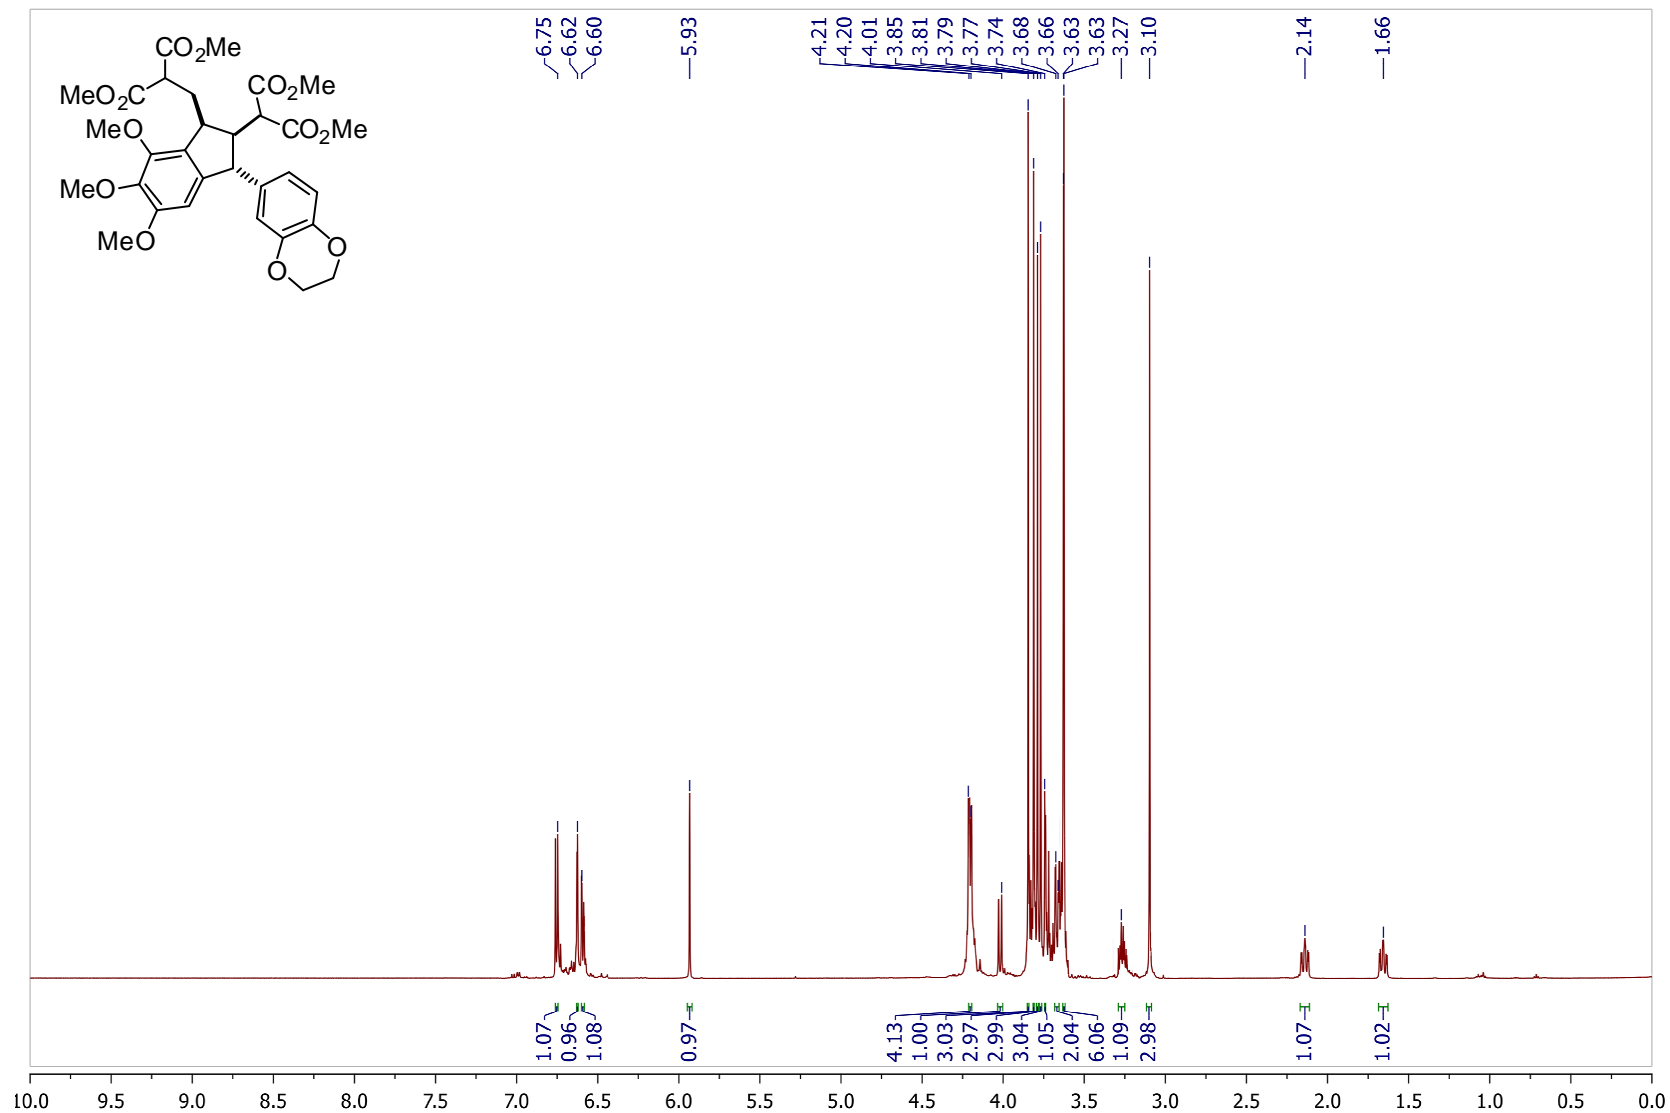

**Dimethyl ((1*RS*,2*SR*,3*SR*)-3-(2,3-dihydro-1,4-benzodioxin-6-yl)-5,6,7-trimethoxy-2-[2-methoxy-1-(methoxycarbonyl)-2-oxoethyl]-2,3-dihydro-1*H*-inden-1-yl)methyl)malonate (2e)**

COSY  $^1\text{H}$ - $^1\text{H}$

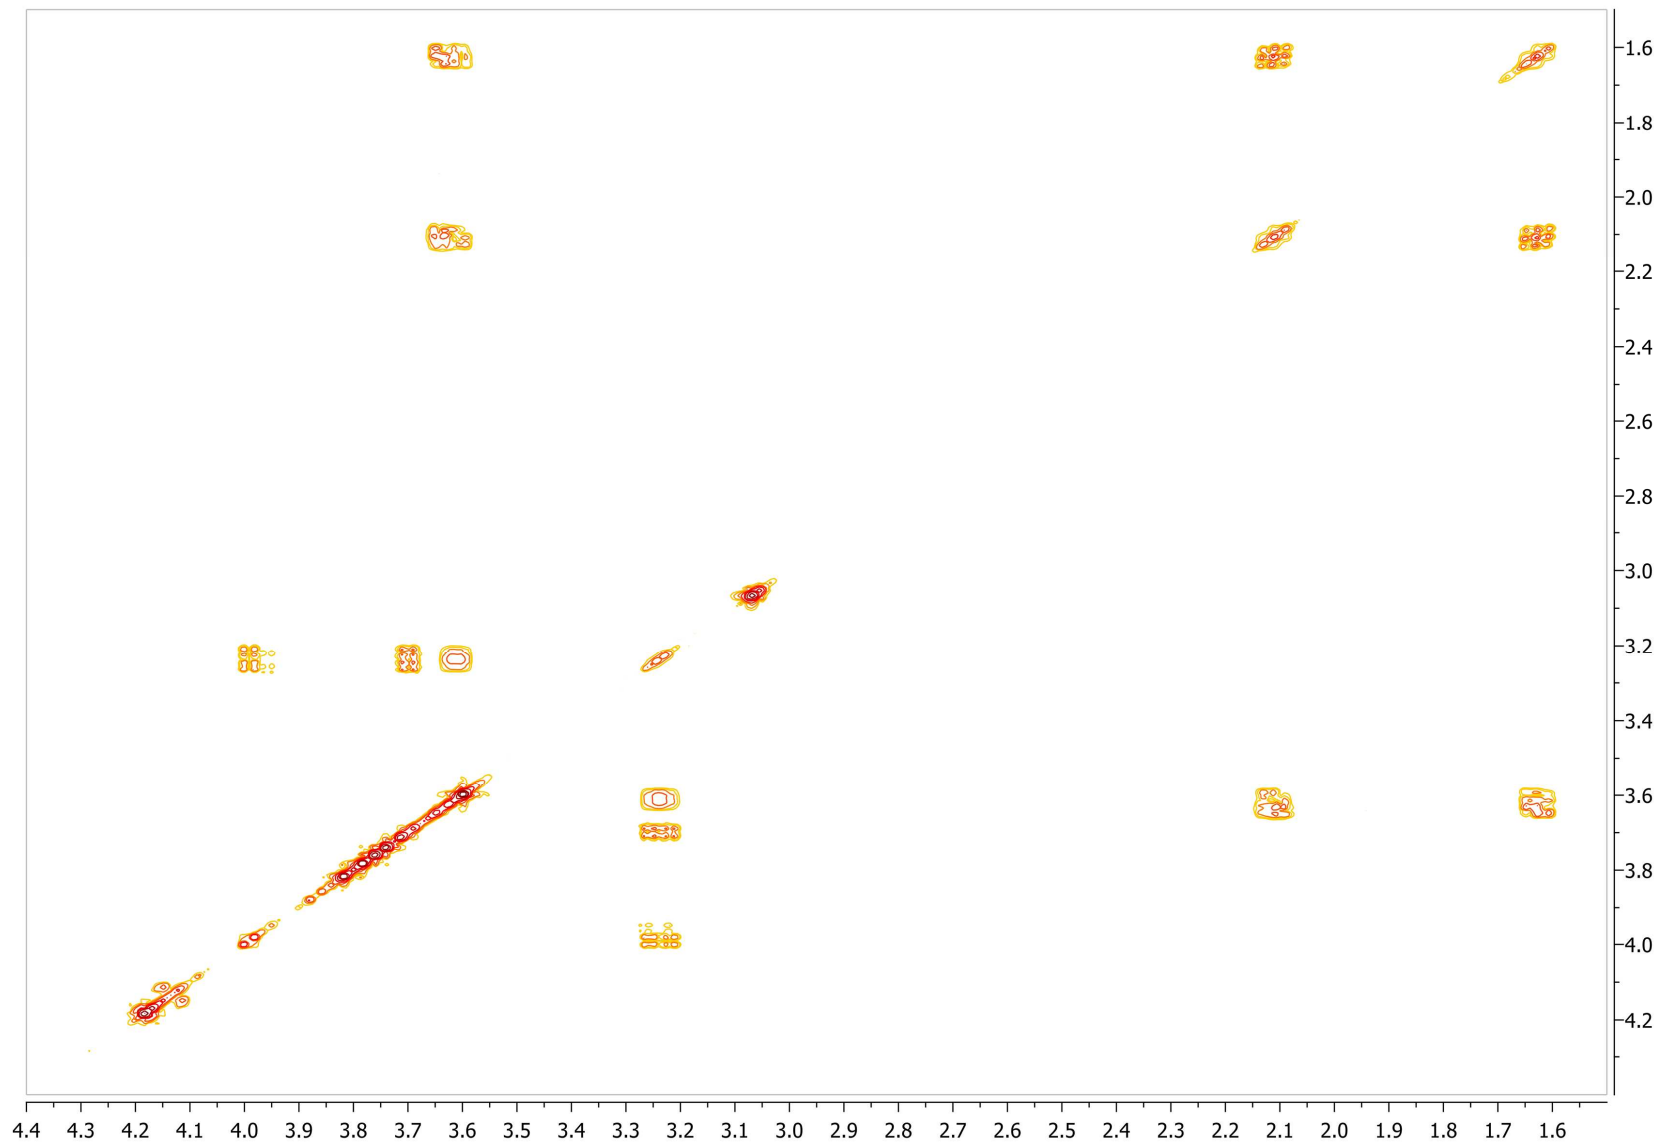



**Dimethyl ((1*RS*,2*SR*,3*SR*)-3-(2,3-dihydro-1,4-benzodioxin-6-yl)-5,6,7-trimethoxy-2-[2-methoxy-1-(methoxycarbonyl)-2-oxoethyl]-2,3-dihydro-1*H*-inden-1-yl)methyl)malonate (2e)**

$^{13}\text{C}$  NMR ( $\text{CDCl}_3$ , 150 MHz)

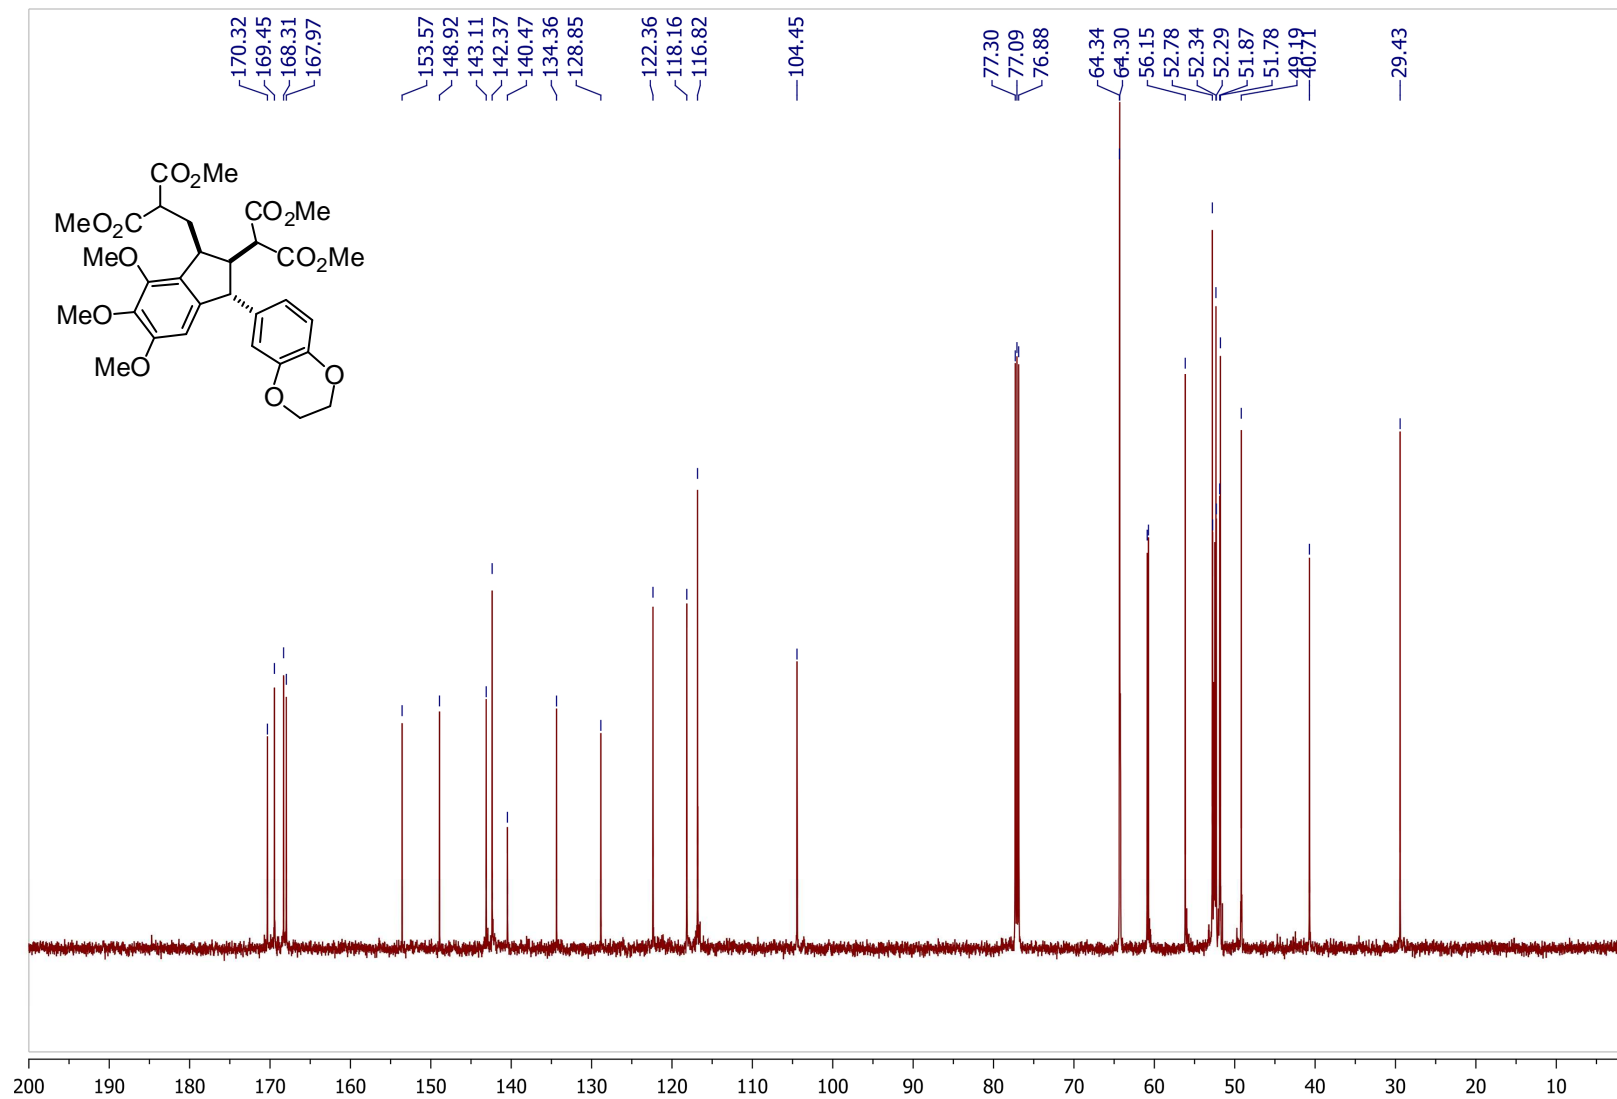

**Dimethyl {[(6*RS*,7*SR*,8*SR*)-7-[2-methoxy-1-(methoxycarbonyl)-2-oxoethyl]-8-(4-methoxyphenyl)-2,3,7,8-tetrahydro-6H-indeno[5,6-b][1,4]dioxin-6-yl)methyl}malonate (2f)**

<sup>1</sup>H NMR (CDCl<sub>3</sub>, 600 MHz)

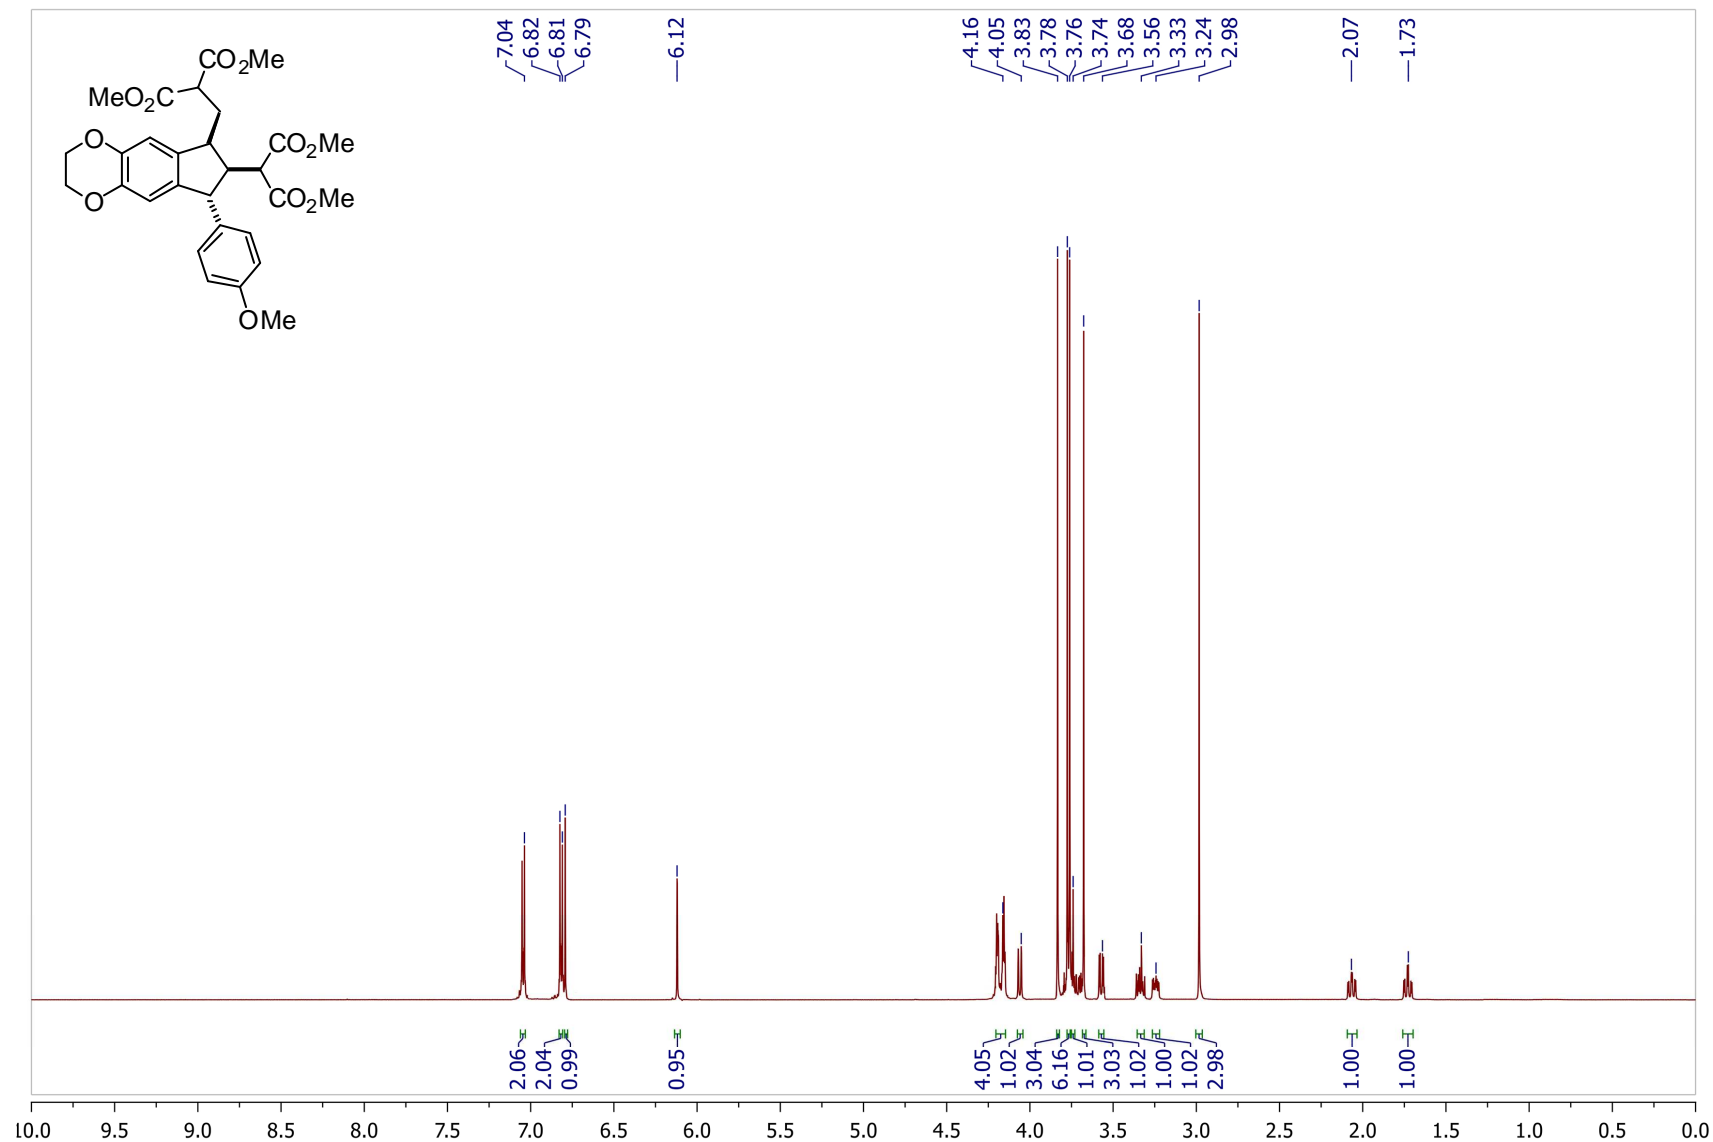

**Dimethyl {[*(6R,7SR,8SR)*-7-[2-methoxy-1-(methoxycarbonyl)-2-oxoethyl]-8-(4-methoxyphenyl)-2,3,7,8-tetrahydro-6H-indeno[5,6-b][1,4]dioxin-6-yl]methyl}malonate (2f)**

$^{13}\text{C}$  NMR ( $\text{CDCl}_3$ , 150 MHz)

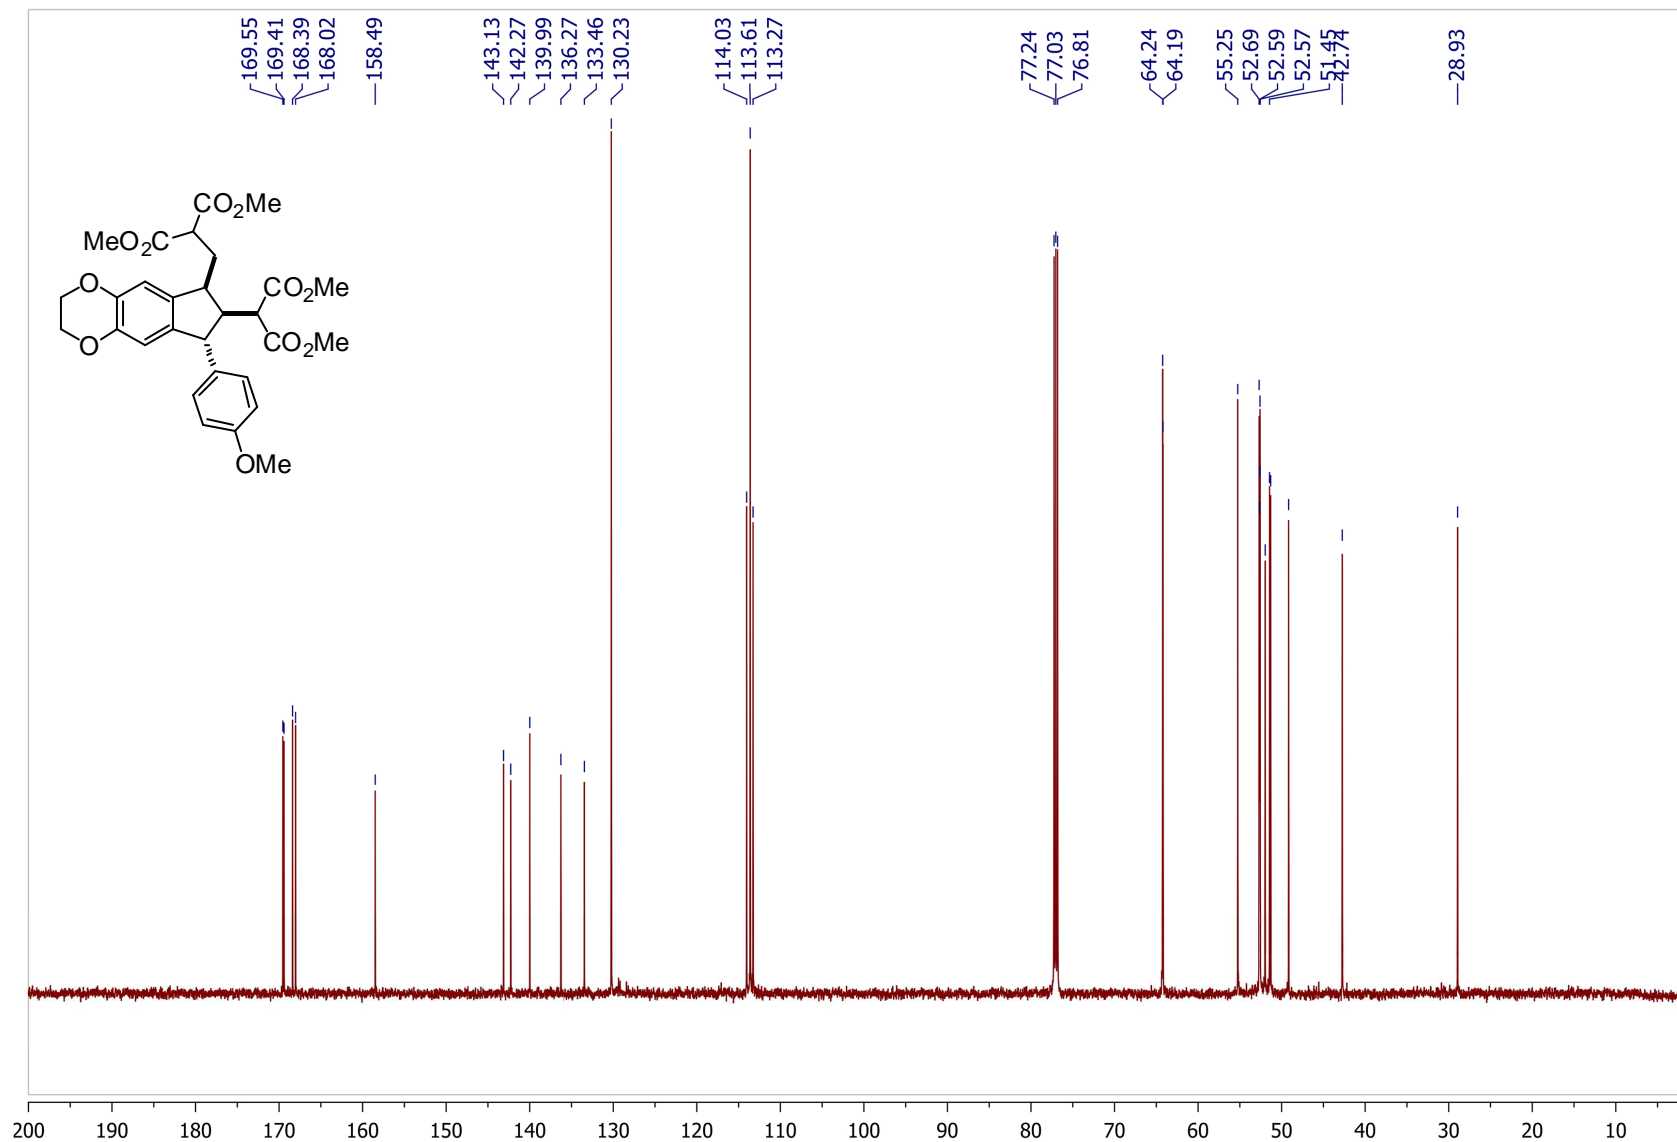

**Dimethyl ({(1*RS*,2*SR*,3*SR*)-4,5,6-trimethoxy-2-[2-methoxy-1-(methoxycarbonyl)-2-oxoethyl]- 3-(4-methoxyphenyl)-2,3-dihydro-1*H*-inden-1-yl)methyl}malonate (2g)**

<sup>1</sup>H NMR (CDCl<sub>3</sub>, 600 MHz)

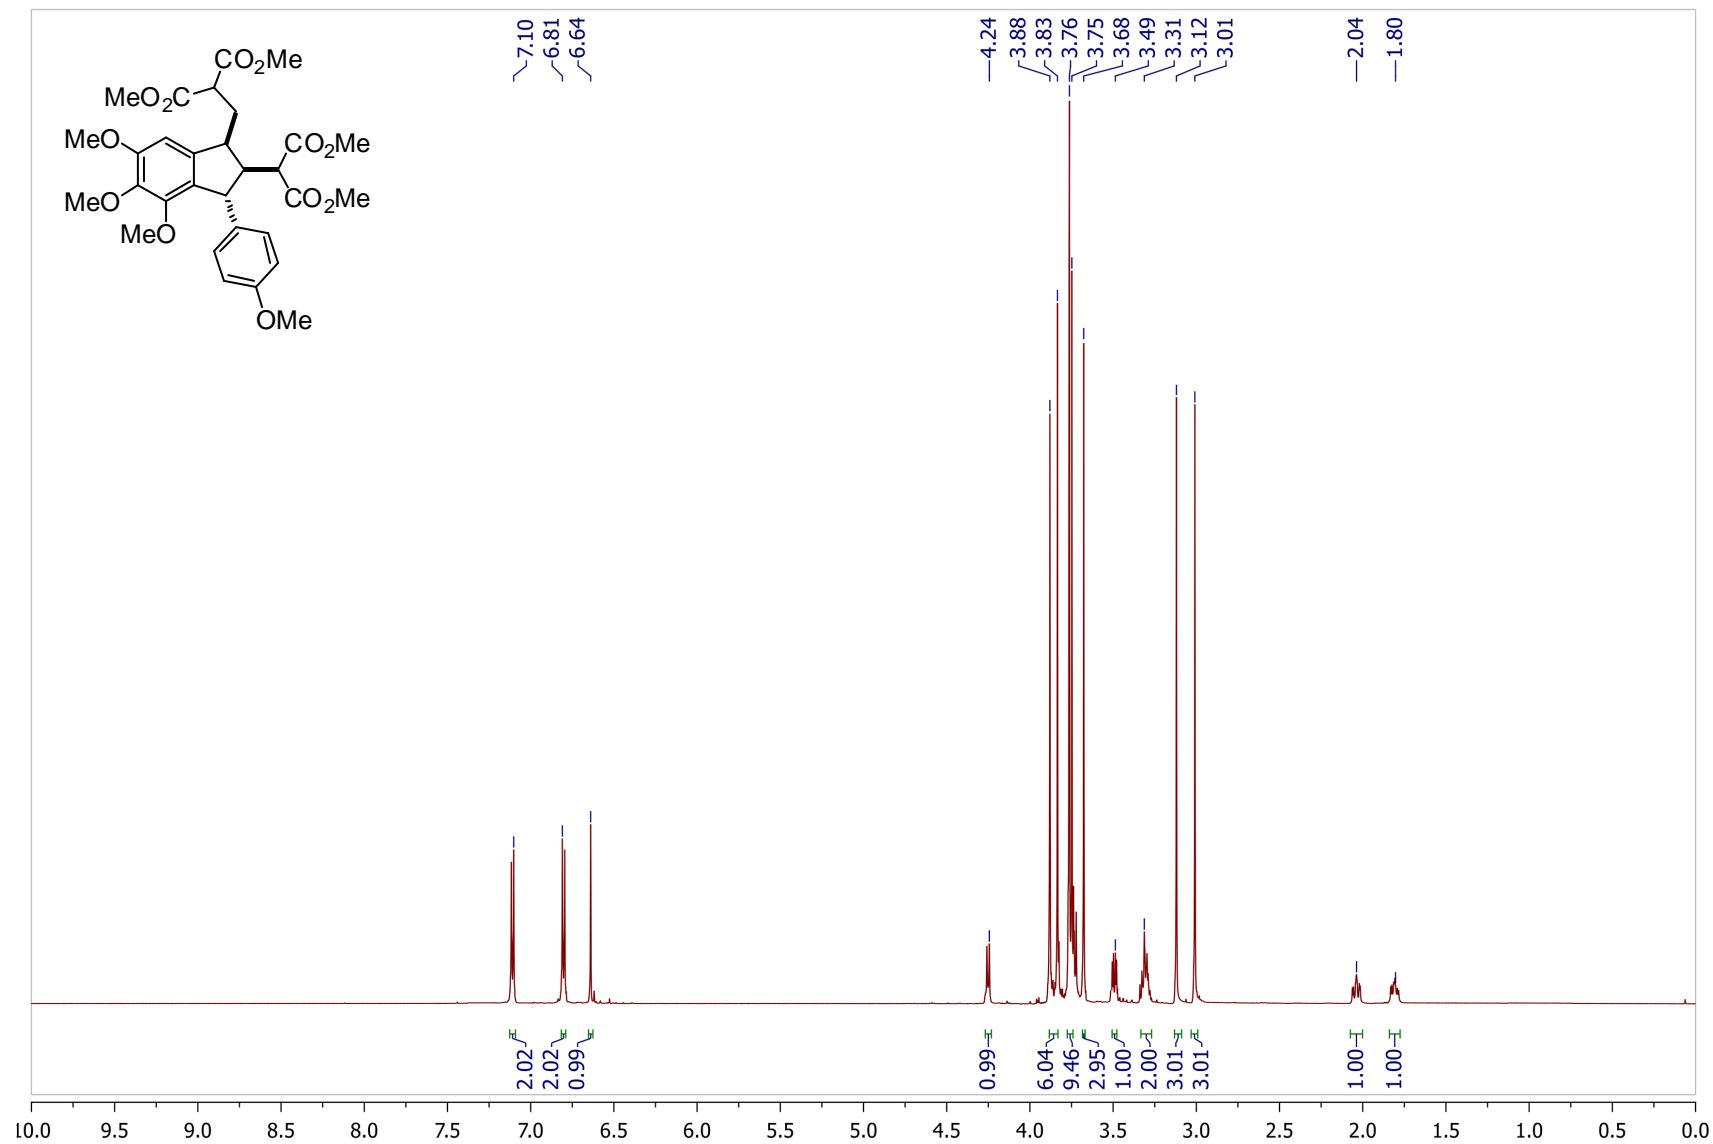

**Dimethyl ((1*RS*,2*SR*,3*SR*)-4,5,6-trimethoxy-2-[2-methoxy-1-(methoxycarbonyl)-2-oxoethyl]- 3-(4-methoxyphenyl)-2,3-dihydro-1*H*-inden-1-yl)methylmalonate (2g)**

<sup>13</sup>C NMR (CDCl<sub>3</sub>, 150 MHz)

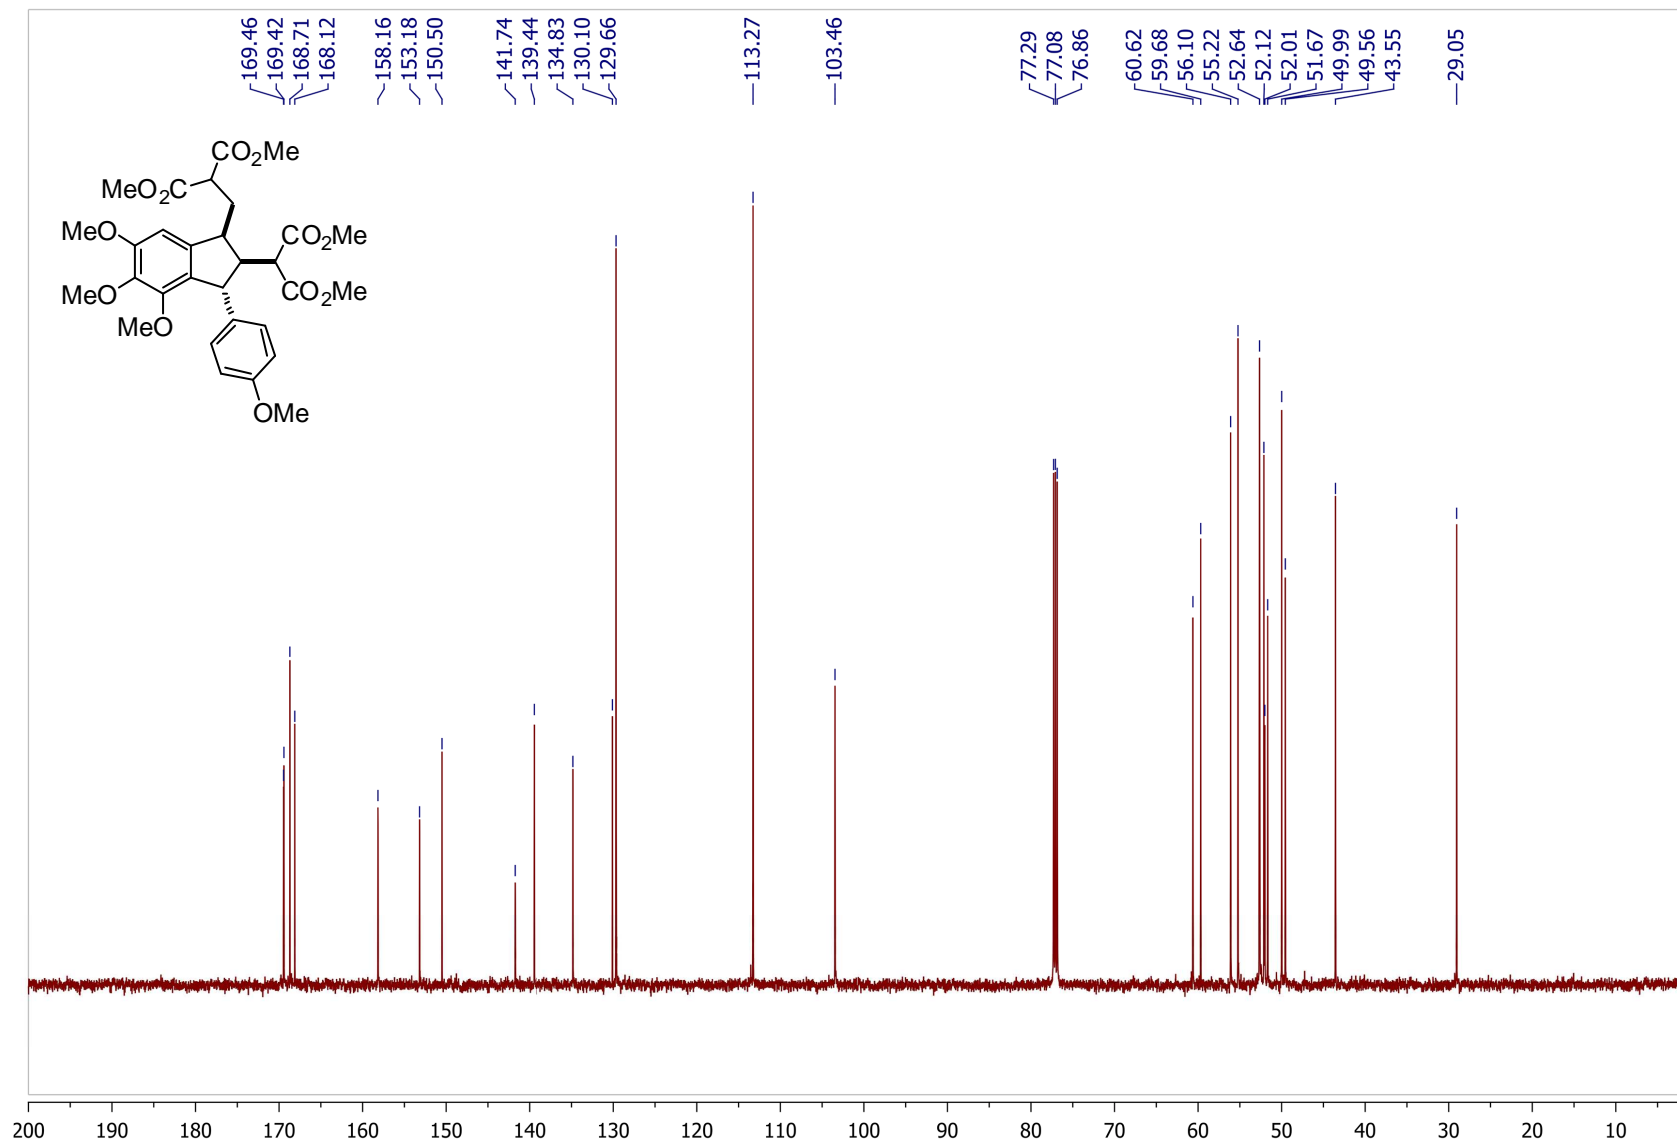

**Dimethyl [(4*RS*,5*RS*,6*SR*)-5-[2-methoxy-1-(methoxycarbonyl)-2-oxoethyl]-4-(4-methoxyphenyl)-2-methyl-5,6-dihydro-4*H*-cyclopenta[*b*]thien-6-yl]methyl}malonate (2h)**

<sup>1</sup>H NMR (CDCl<sub>3</sub>, 600 MHz)

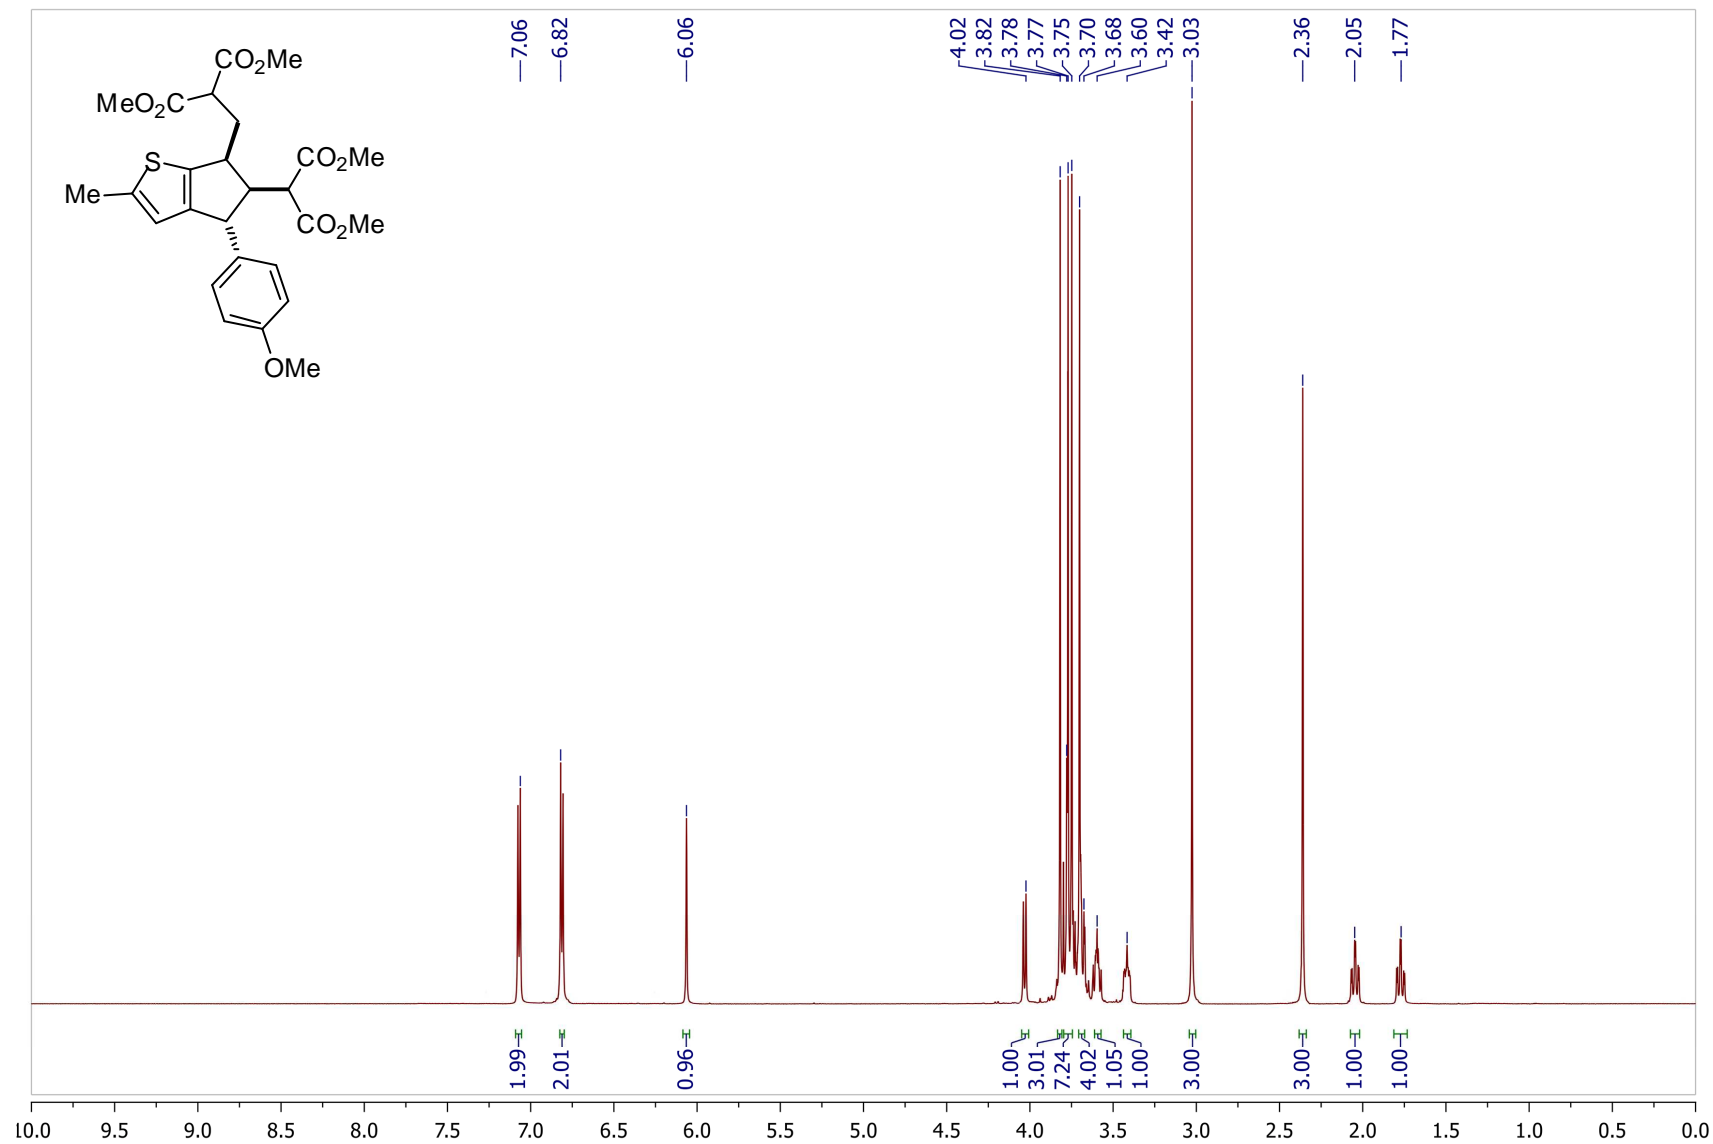

**Dimethyl [(4*RS*,5*RS*,6*SR*)-5-[2-methoxy-1-(methoxycarbonyl)-2-oxoethyl]-4-(4-methoxyphenyl)-2-methyl-5,6-dihydro-4*H*-cyclopenta[*b*]thien-6-yl]methyl}malonate (2h)**

<sup>13</sup>C NMR (CDCl<sub>3</sub>, 150 MHz)

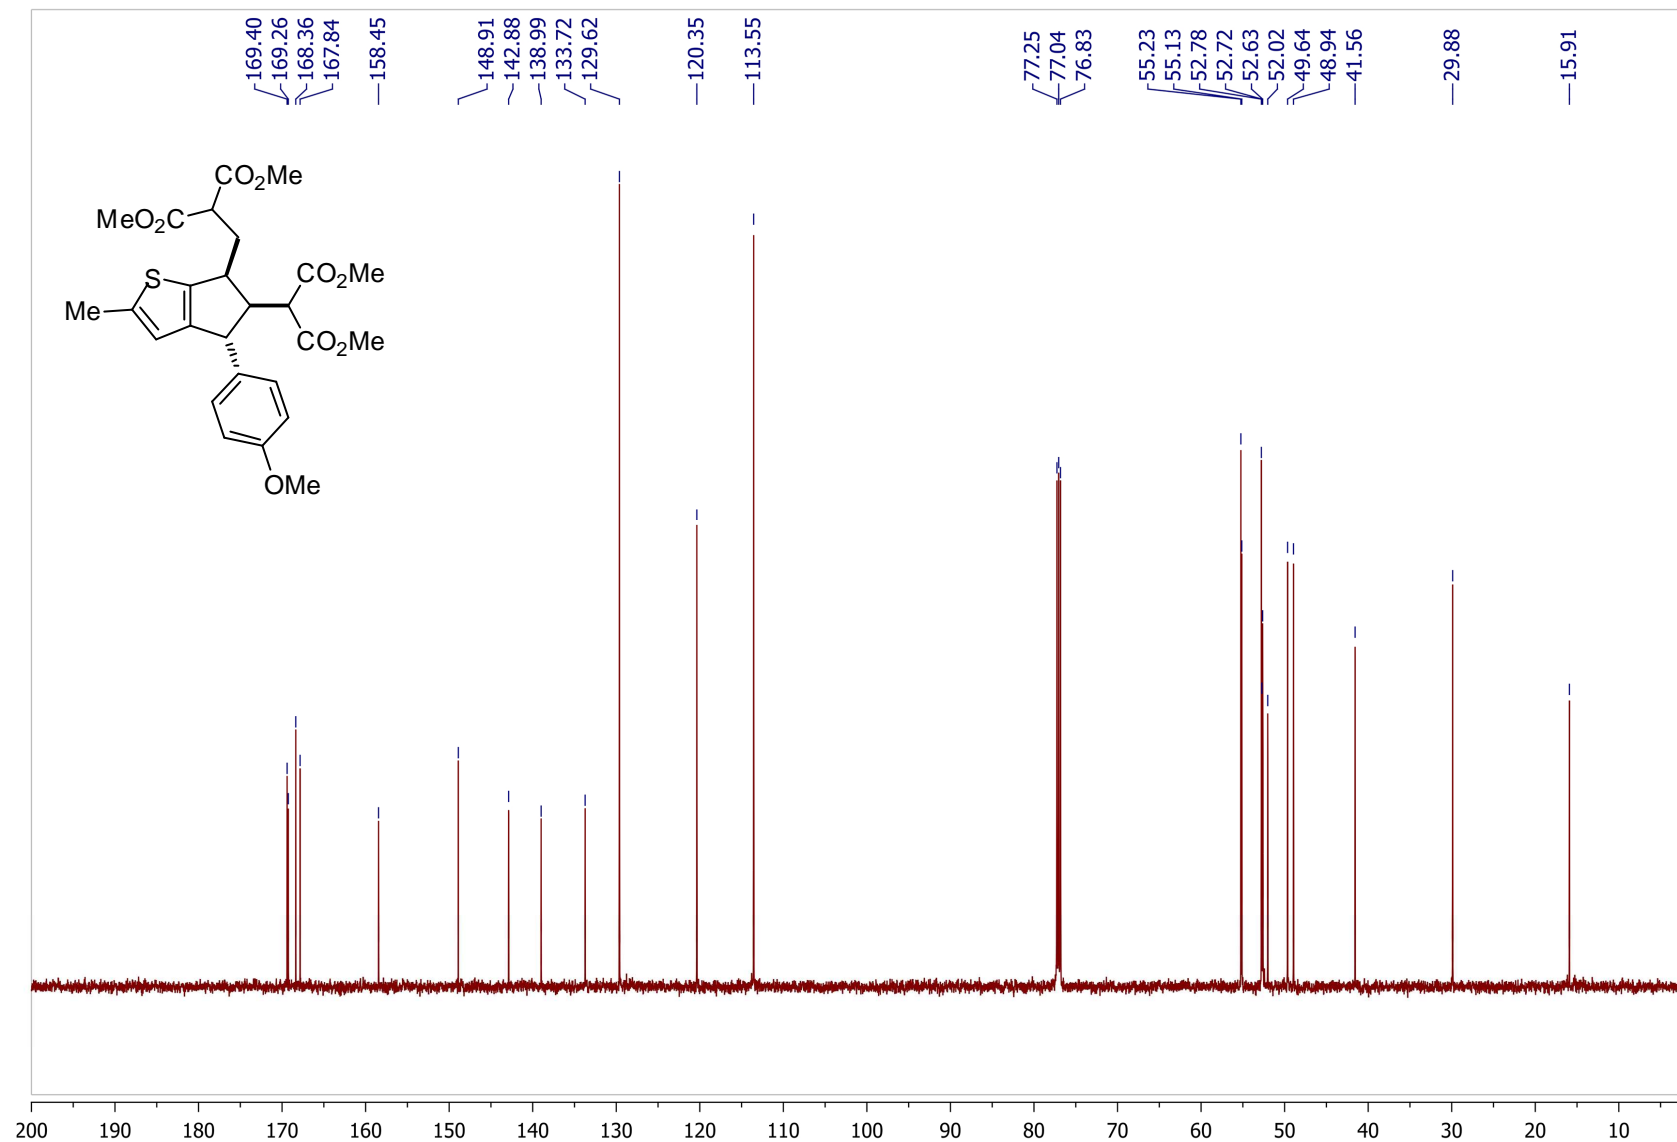

**Dimethyl {[*(1R,2SR,3SR)*-2-[2-methoxy-1-(methoxycarbonyl)-2-oxoethyl]-1-(4-methoxyphenyl)-2,3-dihydro-1*H*-benzo[*b*]cyclopenta[*d*]furan-3-yl]methyl}malonate (2i)**

<sup>1</sup>H NMR (CDCl<sub>3</sub>, 600 MHz)

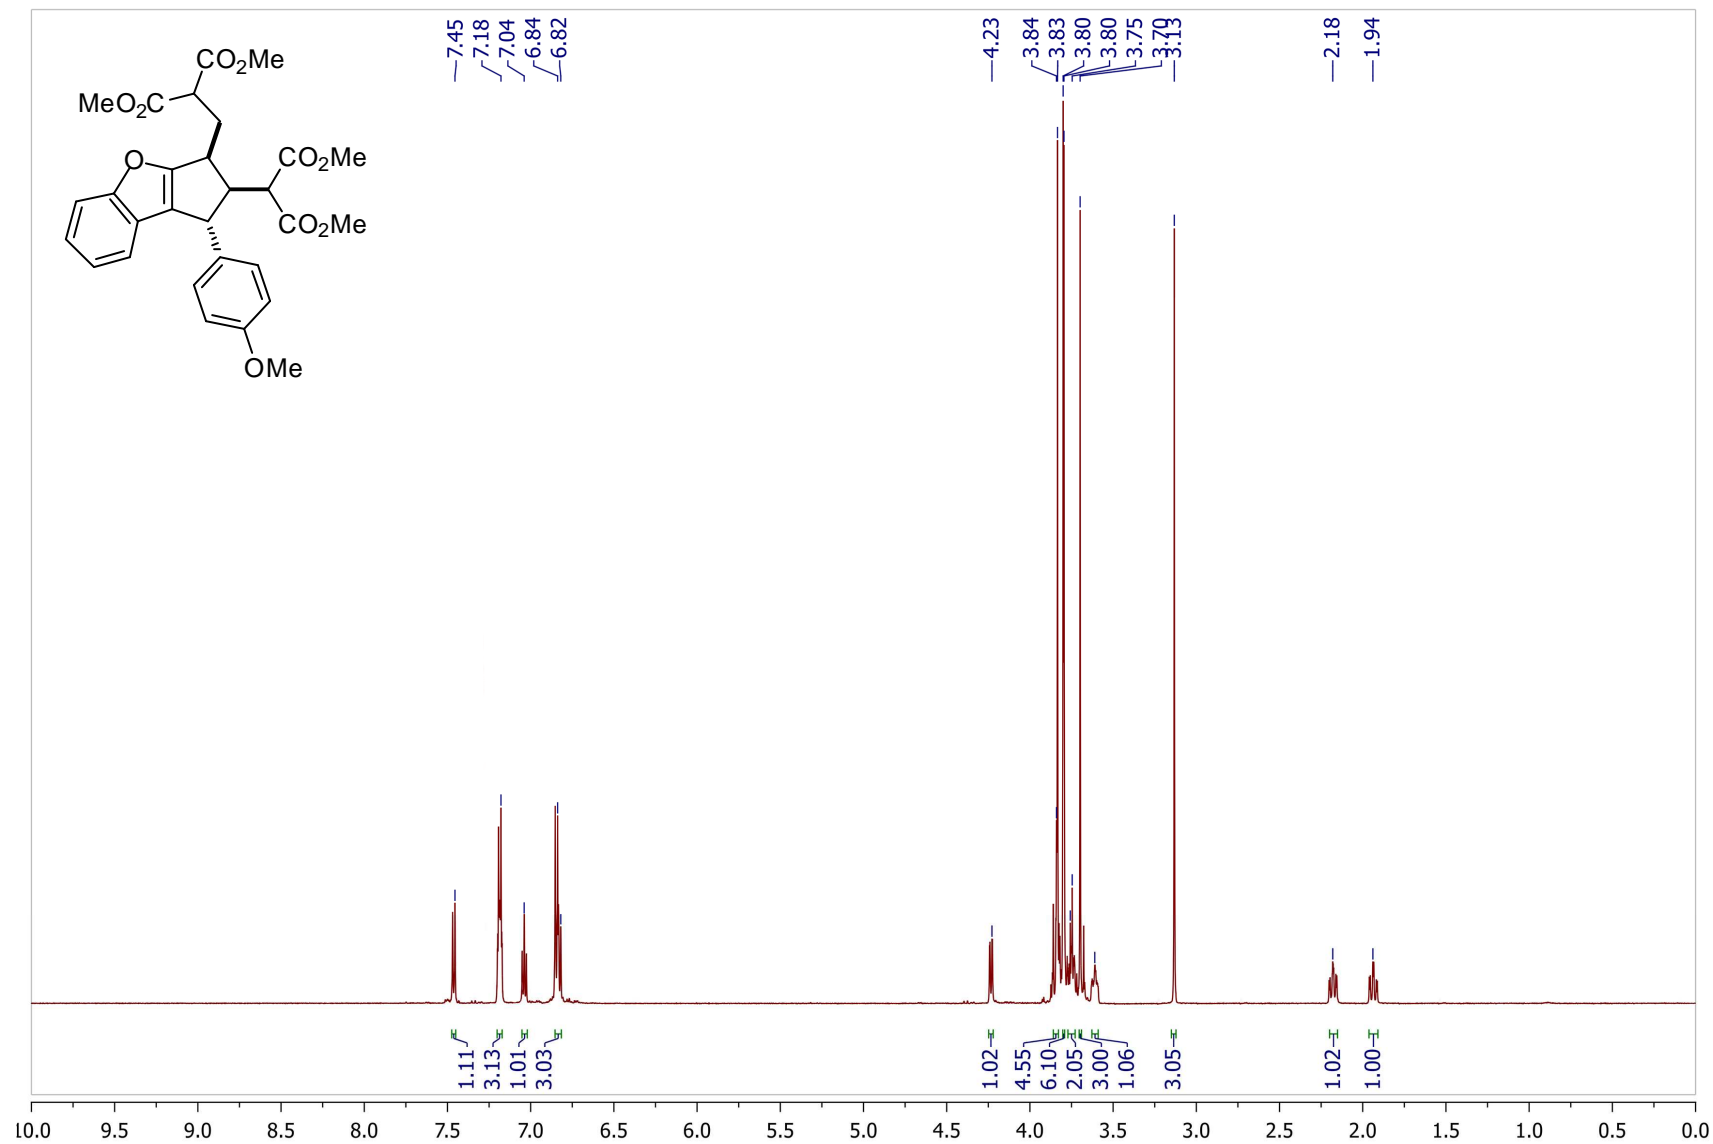



**Dimethyl {[*(1R,2S,3S)*]-2-[2-methoxy-1-(methoxycarbonyl)-2-oxoethyl]-1-(4-methoxyphenyl)-2,3-dihydro-1*H*-benzo[*b*]cyclopenta[*d*]furan-3-yl]methyl}malonate (2i)**

<sup>13</sup>C NMR (CDCl<sub>3</sub>, 150 MHz)

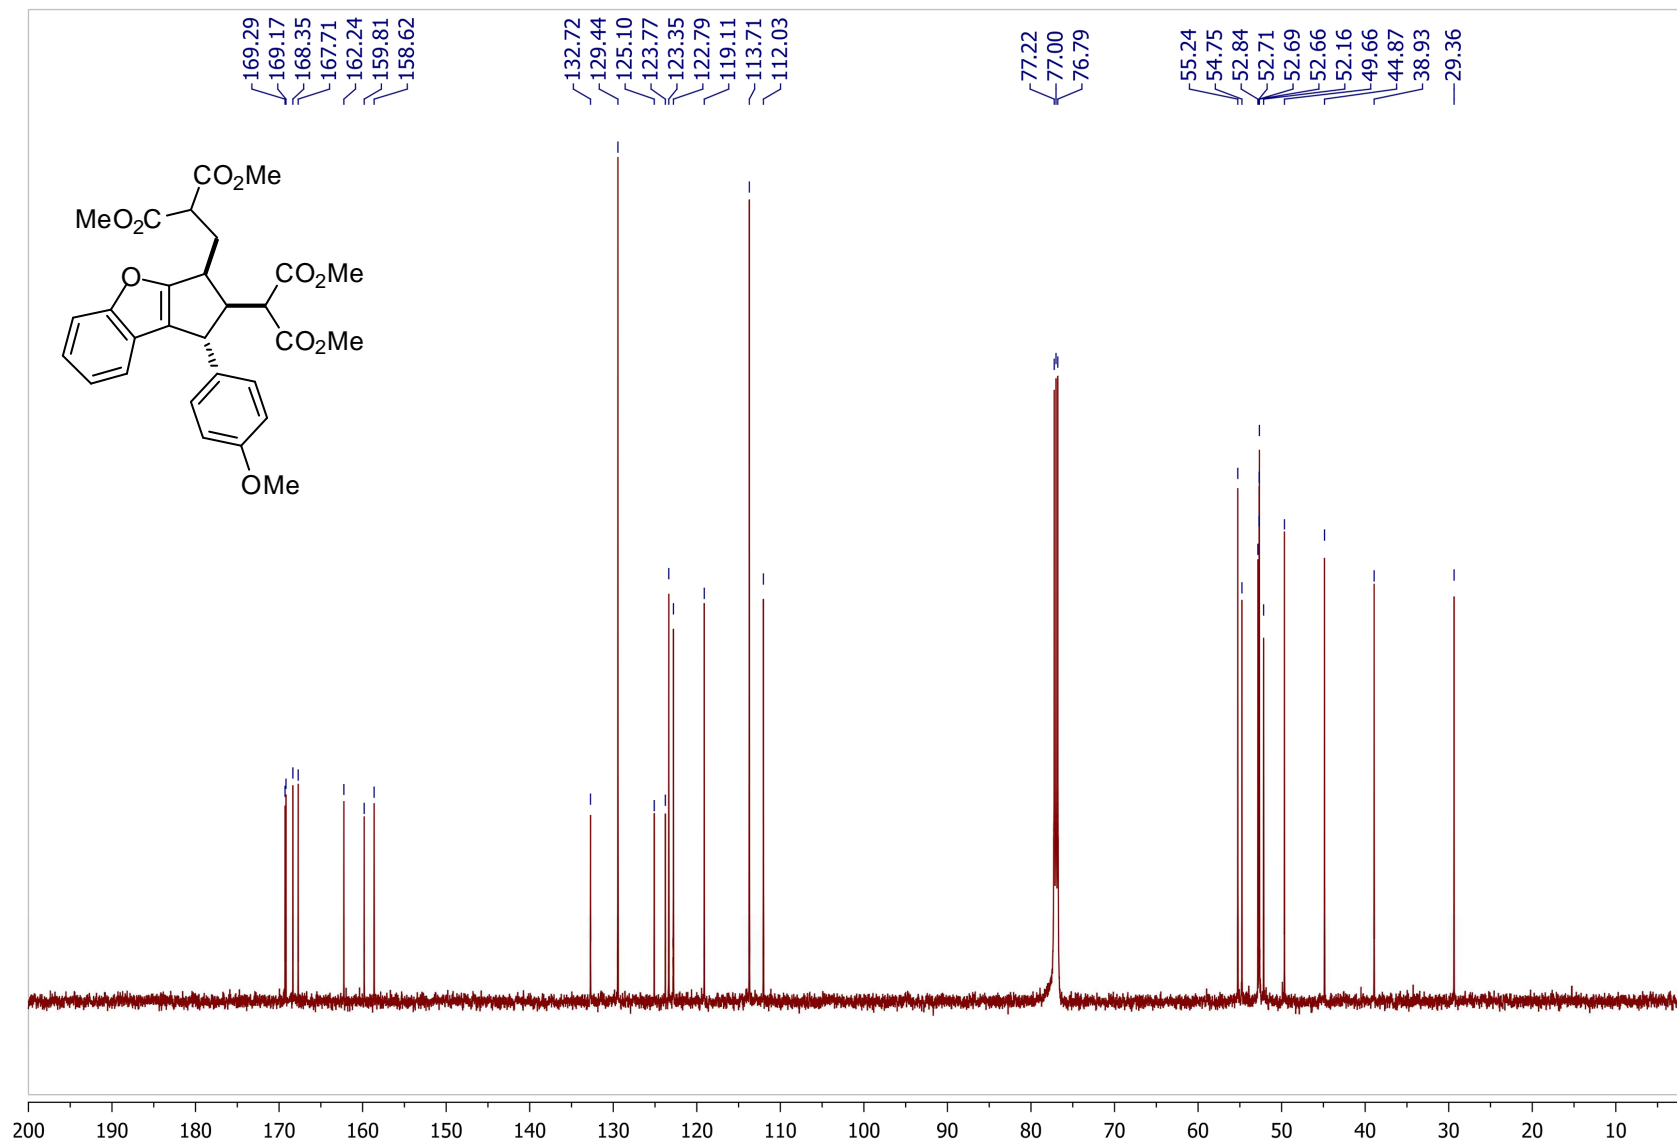

Supplement: c3cc44475a.pdf [file c3cc44475a.pdf]
